# Supplementary material for: Revealing prognostic insights of programmed cell death (PCD)-associated genes in advanced non-small cell lung cancer
Source: publisher site journal article supplement (doi:10.18632/aging.205807), 2024-05-08
Supplement: Supplementary file [file aging-v16i9-205807-supplementary-material-SD3.pdf]

**SUPPLEMENTARY TABLES**

**Supplementary Table 2. The sample information in TCGA-Advanced NSCLC cohort.**

| TCGA_Advanced NSCLC    |                     |                    |         |                     |                    |         |
|------------------------|---------------------|--------------------|---------|---------------------|--------------------|---------|
|                        | Cluster1<br>(N=153) | Cluster2<br>(N=44) | P-value | High_risk<br>(N=98) | Low_risk<br>(N=99) | P-value |
| <b>Age:</b>            |                     |                    | 0.213   |                     |                    | 1.000   |
| <=65                   | 65 (42.5%)          | 24 (54.5%)         |         | 44 (44.9%)          | 45 (45.5%)         |         |
| >65                    | 88 (57.5%)          | 20 (45.5%)         |         | 54 (55.1%)          | 54 (54.5%)         |         |
| <b>Gender:</b>         |                     |                    | 0.010   |                     |                    | 0.267   |
| Female                 | 52 (34.0%)          | 25 (56.8%)         |         | 34 (34.7%)          | 43 (43.4%)         |         |
| Male                   | 101 (66.0%)         | 19 (43.2%)         |         | 64 (65.3%)          | 56 (56.6%)         |         |
| <b>Stage:</b>          |                     |                    | 0.953   |                     |                    | 0.239   |
| III                    | 128 (83.7%)         | 36 (81.8%)         |         | 78 (79.6%)          | 86 (86.9%)         |         |
| IV                     | 25 (16.3%)          | 8 (18.2%)          |         | 20 (20.4%)          | 13 (13.1%)         |         |
| <b>T_stage:</b>        |                     |                    | 0.665   |                     |                    | 0.769   |
| T1                     | 14 (9.15%)          | 6 (13.6%)          |         | 9 (9.18%)           | 11 (11.1%)         |         |
| T2                     | 68 (44.4%)          | 19 (43.2%)         |         | 42 (42.9%)          | 45 (45.5%)         |         |
| T3                     | 39 (25.5%)          | 8 (18.2%)          |         | 27 (27.6%)          | 20 (20.2%)         |         |
| T4                     | 30 (19.6%)          | 10 (22.7%)         |         | 19 (19.4%)          | 21 (21.2%)         |         |
| TX                     | 2 (1.31%)           | 1 (2.27%)          |         | 1 (1.02%)           | 2 (2.02%)          |         |
| <b>M_stage:</b>        |                     |                    | 0.254   |                     |                    | 0.052   |
| Deficient              | 2 (1.31%)           | 1 (2.27%)          |         | 3 (3.06%)           | 0 (0.00%)          |         |
| M0                     | 107 (69.9%)         | 25 (56.8%)         |         | 58 (59.2%)          | 74 (74.7%)         |         |
| M1                     | 24 (15.7%)          | 8 (18.2%)          |         | 20 (20.4%)          | 12 (12.1%)         |         |
| MX                     | 20 (13.1%)          | 10 (22.7%)         |         | 17 (17.3%)          | 13 (13.1%)         |         |
| <b>N_stage:</b>        |                     |                    | 0.896   |                     |                    | 0.418   |
| N0                     | 22 (14.4%)          | 8 (18.2%)          |         | 16 (16.3%)          | 14 (14.1%)         |         |
| N1                     | 35 (22.9%)          | 11 (25.0%)         |         | 23 (23.5%)          | 23 (23.2%)         |         |
| N2                     | 87 (56.9%)          | 22 (50.0%)         |         | 56 (57.1%)          | 53 (53.5%)         |         |
| N3                     | 5 (3.27%)           | 2 (4.55%)          |         | 1 (1.02%)           | 6 (6.06%)          |         |
| NX                     | 4 (2.61%)           | 1 (2.27%)          |         | 2 (2.04%)           | 3 (3.03%)          |         |
| <b>Tissue_origin:</b>  |                     |                    | 0.871   |                     |                    | 0.139   |
| Lower lobe             | 51 (33.3%)          | 15 (34.1%)         |         | 26 (26.5%)          | 40 (40.4%)         |         |
| Middle lobe            | 9 (5.88%)           | 1 (2.27%)          |         | 4 (4.08%)           | 6 (6.06%)          |         |
| Other                  | 17 (11.1%)          | 4 (9.09%)          |         | 11 (11.2%)          | 10 (10.1%)         |         |
| Upper lobe             | 76 (49.7%)          | 24 (54.5%)         |         | 57 (58.2%)          | 43 (43.4%)         |         |
| <b>Race:</b>           |                     |                    | 0.127   |                     |                    | 0.897   |
| Asian                  | 2 (1.31%)           | 3 (6.82%)          |         | 2 (2.04%)           | 3 (3.03%)          |         |
| Black or African       |                     |                    |         |                     |                    |         |
| American               | 14 (9.15%)          | 3 (6.82%)          |         | 9 (9.18%)           | 8 (8.08%)          |         |
| Unknown                | 39 (25.5%)          | 7 (15.9%)          |         | 21 (21.4%)          | 25 (25.3%)         |         |
| white                  | 98 (64.1%)          | 31 (70.5%)         |         | 66 (67.3%)          | 63 (63.6%)         |         |
| <b>Smoking_Status:</b> |                     |                    | 0.756   |                     |                    | 0.125   |
| non-smoke              | 36 (23.5%)          | 12 (27.3%)         |         | 29 (29.6%)          | 19 (19.2%)         |         |
| Smoke                  | 117 (76.5%)         | 32 (72.7%)         |         | 69 (70.4%)          | 80 (80.8%)         |         |
| <b>OS.time</b>         |                     | 692                |         | 389                 |                    |         |
| <b>OS_status:</b>      | 468 [215;951]       | [407;1177]         | 0.030   | [144;728]           | 716 [420;1177]     | <0.001  |
|                        |                     |                    | 0.139   |                     |                    | 0.003   |

|             |             |            |       |            |            |       |
|-------------|-------------|------------|-------|------------|------------|-------|
| Alive       | 62 (40.5%)  | 24 (54.5%) |       | 32 (32.7%) | 54 (54.5%) |       |
| Dead        | 91 (59.5%)  | 20 (45.5%) |       | 66 (67.3%) | 45 (45.5%) |       |
| <b>TMB:</b> |             |            | 0.541 |            |            | 0.422 |
| NA          | 1 (0.65%)   | 1 (2.27%)  |       | 0 (0.00%)  | 2 (2.02%)  |       |
| TMB<10      | 144 (94.1%) | 41 (93.2%) |       | 92 (93.9%) | 93 (93.9%) |       |
| TMB>=10     | 8 (5.23%)   | 2 (4.55%)  |       | 6 (6.12%)  | 4 (4.04%)  |       |

---
