# Supplementary material for: Revealing prognostic insights of programmed cell death (PCD)-associated genes in advanced non-small cell lung cancer
Source: publisher site journal article supplement (doi:10.18632/aging.205807), 2024-05-08
Supplement: Supplementary file [file aging-v16i9-205807-supplementary-material-SD7.pdf]

**Supplementary Table 6. Interaction between target protein and candidate small molecules according to the molecular docking analysis.**

| <b>2Q8R:ZINC150338726(navitoclax)</b> |          |        |     |     |     |             |          |             |
|---------------------------------------|----------|--------|-----|-----|-----|-------------|----------|-------------|
| Ligand                                | Receptor |        |     |     |     | Interaction | Distance | E(kcal/mol) |
| S                                     | 86       | OE1    | GLN | 20  | (H) | H-donor     | 3.87     | -0.5        |
| O                                     | 100      | O      | HOH | 112 | (G) | H-acceptor  | 2.93     | -0.6        |
| O                                     | 101      | O      | HOH | 117 | (H) | H-acceptor  | 2.91     | -1.3        |
| 6-ring                                |          | CB     | GLN | 20  | (H) | pi-H        | 4.26     | -0.5        |
| <b>4BD9:ZINC150338726(navitoclax)</b> |          |        |     |     |     |             |          |             |
| Ligand                                | Receptor |        |     |     |     | Interaction | Distance | E(kcal/mol) |
| O                                     | 52       | CA     | GLU | 136 | (B) | H-acceptor  | 3.46     | -0.6        |
| <b>5WN9:ZINC150338726(navitoclax)</b> |          |        |     |     |     |             |          |             |
| Ligand                                | Receptor |        |     |     |     | Interaction | Distance | E(kcal/mol) |
| 6-ring                                |          | CA     | LEU | 184 | (H) | pi-H        | 4.01     | -0.5        |
| <b>7BQV:ZINC000066099927(AZD1480)</b> |          |        |     |     |     |             |          |             |
| Ligand                                | Receptor |        |     |     |     | Interaction | Distance | E(kcal/mol) |
| N                                     | 37       | 5-ring | TRP | 380 | (A) | H-pi        | 3.71     | -0.7        |
| 6-ring                                |          | O      | HOH | 602 | (B) | pi-H        | 3.3      | -0.9        |
| <b>7X4N:ZINC13476439(MG-132)</b>      |          |        |     |     |     |             |          |             |
| Ligand                                | Receptor |        |     |     |     | Interaction | Distance | E(kcal/mol) |
| N                                     | 38       | OE2    | GLU | 411 | (A) | H-donor     | 3.28     | -1          |
| O                                     | 18       | NE     | ARG | 105 | (A) | H-acceptor  | 3.16     | -2          |
