# Supplementary material for: Revealing prognostic insights of programmed cell death (PCD)-associated genes in advanced non-small cell lung cancer
Source: Aging (Albany NY). 2024 May 8;16(9):8110–41. doi: 10.18632/aging.205807 (PMC11131998; doi:10.18632/aging.205807)
Supplement: Supplementary Table 1 [file aging-16-205807-s002.xlsx]

## Sheet: Sheet1
Supplementary Table 1. The programmed cell death (PCD) genes acquired from Zou et al. 2022.
Apoptosis	Autophagy	Lysosome-dependent cell death	Necroptosis	Ferroptosis	Pyroptosis	Entotic cell death	Cuproptosis	Parthanatos	Netotic cell death	Alkaliptosis	Oxeiptosis
AATF	ABL1	ABCA2	GLUD1	ABCC1	BAK1	AMPK	FDX1	PARP	ELANE	IKBKB	PGAM5
ABL1	ABL2	ABCB9	GLUD2	ACACA	BAX	ATG5	LIAS	MIF	MMP1	NFKB1	KEAP1
ACAA2	ACER2	ACP2	ALOX15	ACO1	CASP1	ATG7	LIPT1	AIFM1	MPO	CA9	AIFM1
ACKR3	ADRA1A	ACP5	FTH1	ACSF2	CASP3	BECN1	DLD	HSP70	CAMP	CHUK	NRF2
ACVR1	ADRB2	ADGRE2	PYG	ACSL1	CASP4	CDC	DLAT	PAAN	PADI4	IKBKG	AIRE
ACVR1B	AKT1	AGA	CAPN1	ACSL3	CASP5	CDH1	PDHA1	ARH3	EIPA	NFKB1A
ADORA1	AMBRA1	AP1B1	CASP1	ACSL4	CASP6	CTNNA1	PDHB	RNF146	NCX1	RELA
AEN	ATF6	AP1G1	GLNA	ACSL5	CASP8	CYBB	MTF1	ADPRHL2	MIA
AGT	ATG101	AP1M1	BAX	ACSL6	CASP9	MYH14	GLS	OGG1
AGTR2	ATG13	AP1M2	BCL2	AIFM2	CHMP2A	PI3KC3	CDKN2A
AIFM1	ATG14	AP1S1	FADD	AKR1C1	CHMP2B	RHOA	GCSH
AKT1	ATG2A	AP1S2	RIPK1	AKR1C2	CHMP3	RNF146	ATP7A
ANXA6	ATG2B	AP1S3	TNF	AKR1C3	CHMP4A	ROCK	ATP7B
APAF1	ATG5	AP3B1	TNFRSF1A	ALOX12	CHMP4B	RUBCN	SLC31A1
APPL1	ATG7	AP3B2	TRADD	ALOX15	CHMP4C	UVRAG
AR	ATM	AP3D1	TRAF2	ALOX5	CHMP6
ARHGEF2	ATP13A2	AP3M1	PPIA	ATG5	CHMP7
ARL6IP5	ATP6V0A1	AP3M2	CAPN2	ATG7	CYCS
ARMC10	ATP6V0A2	AP3S1	HSP90A	ATP5MC3	ELANE
ARRB2	ATP6V0B	AP3S2	IL1A	BACH1	GPX4
ASAH2	ATP6V0C	AP4B1	TNFSF6	CARS	GSDMB
ATF3	ATP6V0D1	AP4E1	TNFRSF6	CBS	GSDMC
ATF4	ATP6V0D2	AP4M1	CASP8	CD44	GSDMD
ATM	ATP6V0E1	AP4S1	JNK	CHAC1	GSDME
ATP2A1	ATP6V0E2	ARF1	JAK2	CISD1	GZMB
ATP2A3	ATP6V1A	ARL8B	CAMK2	CP	HMGB1
ATP5IF1	ATP6V1B1	ARSA	IL1B	CRYAB	IL18
AVP	ATP6V1B2	ARSB	IFNG	CS	IL1A
BAD	ATP6V1C1	ARSG	STAT3	CYBB	IL1B
BAG3	ATP6V1C2	ASAH1	IRF9	DPP4	IRF1
BAG5	ATP6V1D	ATP10B	TNFSF10	EMC2	IRF2
BAG6	ATP6V1E1	ATP13A2	TNFRSF10A	FADS2	NLRC4
BAK1	ATP6V1E2	ATP6AP1	TNFRSF10B	FANCD2	NLRP1
BAX	ATP6V1G1	ATP6V0A1	CFLAR	FDFT1	NLRP2
BBC3	ATP6V1G2	ATP6V0A2	XIAP	FTH1	NLRP3
BCAP	ATP6V1H	ATP6V0A4	BID	FTL	NLRP6
BCL10	AUP1	ATP6V0B	AIFM1	FTMT	NLRP7
BCL2	BAD	ATP6V0C	TRPM7	G6PD	NOD1
BCL2A1	BAG3	ATP6V0D1	IFNAR1	GCLC	PLCG1
BCL2L1	BCL2	ATP6V0D2	IFNAR2	GCLM	PJVK
BCL2L10	BCL2L11	ATP6V1H	IFNGR1	GLS2	PRKACA
BCL2L11	BECN1	BLK	IFNGR2	GOT1	PYCARD
BCL2L12	BMF	BLOC1S1	TLR3	GPX4	SCAF11
BCL2L14	BNIP3	BLOC1S2	TIRP	GSS	TINAP
BCL2L2	BNIP3L	BORCS5	IFNA	HMGCR	TNF
BCL3	BOK	BORCS6	IFNB	HMOX1	TP53
BCLAF1	C9orf72	BTK	TRIF	HSBP1	TP63
BDKRB2	CALCOCO2	C12orf4	VDAC1	HSPB1	AIM2
BDNF	CAMKK2	CBL	SLC25A4S	IREB2	GSDMA
BECN1	CAPN1	CD164	PPID	KEAP1	IL6
BID	CAPNS1	CD300A	CYLD	LPCAT3	NOD2
BIK	CASP1	CD63	RIPK3	MAP1LC3A	TIRAP
BIRC6	CASP3	CD68	MLKL	MAP1LC3B
BLOC1S2	CDC37	CD84	TRAF5	MAP1LC3C
BMF	CDK5	CHGA	TLR4	MT1G
BMP4	CDK5R1	CLN3	RBCK1	NCOA4
BMP5	CHMP4A	CLN5	HMGB1	NFE2L2
BMPR1B	CHMP4B	CLNK	JAK1	NFS1
BNIP3	CISD2	CLTA	JAK3	NOX1
BNIP3L	CLEC16A	CLTB	TYK2	NQO1
BOK	CLN3	CLTC	STAT1	NRF2
BRCA1	CLU	CLTCL1	STAT2	OTUB1
BRCA2	CPTP	CLU	STAT4	PCBP1
BRSK2	CSNK2A2	CPLX2	STAT5A	PCBP2
BTK	CTSA	CTNS	STAT5B	PEBP1
CAAP1	CTTN	CTSA	STAT6	PGD
CASP1	DAP	CTSB	H2A	PHKG2
CASP10	DAPK1	CTSC	TNFAIP3	PRNP
CASP12	DAPK2	CTSD	RNF31	PROM2
CASP2	DAPK3	CTSE	CHMP2A	PTGS2
CASP3	DAPL1	CTSF	CHMP2B	RPL8
CASP4	DCN	CTSG	VPS24	SAT1
CASP5	DDIT3	CTSH	CHMP4A	SAT2
CASP8	DDRGK1	CTSK	CHMP4B	SLC11A2
CASP8AP2	DEPDC5	CTSL	CHMP6	SLC1A5
CASP9	DEPP1	CTSO	VPS4	SLC39A14
CAV1	DHRSX	CTSS	CHMP1	SLC39A8
CCAR2	DNM1L	CTSV	CHMP5	SLC3A2
CCK	DRAM1	CTSW	SMPD1	SLC40A1
CD14	DRAM2	CTSZ	PYCARD	SLC7A11
CD24	EEF1A1	DEF8	NLRP3	SQLE
CD27	EEF1A2	DNASE2	ZBP1	STEAP3
CD28	EIF2AK4	DNASE2B	IL33	TF
CD38	EIF4G1	ENTPD4	FTL	TFRC
CD3E	EIF4G2	FAM98A	SQSTM1	TP53
CD44	ELAPOR1	FER	VDAC2	VDAC2
CD5	EP300	FES	VDAC3	VDAC3
CD70	EPM2A	FGR	CHMP7	ZEB1
CD74	ERCC4	FLCN	PGAM5
CDIP1	ERN1	FOXF1	BIRC2
CDKN1A	EXOC1	FTH1	BIRC3
CDKN2D	EXOC4	FTL	EIF2AK2
CEBPB	EXOC7	FUCA1	PLA2G4
CFLAR	EXOC8	GAA	DNM1L
CHAC1	FBXL2	GAB2	SPATA2
CHCHD10	FBXO7	GALC	FAF1
CHEK2	FBXW7	GALNS	SHARPIN
CIB1	FEZ1	GATA2	NOX2
CIDEB	FEZ2	GBA	USP21
CLU	FLCN	GCC2	PARP1
COA8	FOXK1	GGA1	CHMP4C
COL2A1	FOXK2	GGA2
CRADD	FOXO1	GGA3
CREB3	FOXO3	GLA
CREB3L1	FTH1	GLB1
CRH	FTL	GM2A
CRIP1	FYCO1	GNPTAB
CSF2	FZD5	GNPTG
CSNK2A1	GAPDH	GNS
CSNK2A2	GATA4	GUSB
CTH	GBA	HDAC6
CTNNA1	GFAP	HEXA
CTSC	GNAI3	HEXB
CTTN	GOLGA2	HGS
CUL1	GPR137	HGSNAT
CUL2	GPR137B	HMOX1
CUL3	GPSM1	HPS6
CUL4A	GSK3A	HSPA8
CUL5	GSK3B	HYAL1
CX3CL1	HAX1	IDS
CX3CR1	HDAC6	IDUA
CXCL12	HERC1	IGF2R
CYLD	HGF	IL13
CYP1B1	HIF1A	IL13RA2
DAB2IP	HMGB1	IL4
DAP	HMOX1	IL4R
DAP3	HSP90AA1	KIF1B
DAPK1	HSPA8	KIT
DAPK2	HSPB1	KXD1
DAPK3	HSPB8	LAMP1
DAPL1	HTR2B	LAMP2
DAXX	HTRA2	LAMP3
DBH	HTT	LAMTOR1
DCC	HUWE1	LAPTM4A
DDIAS	IFI16	LAPTM4B
DDIT3	IFNG	LAPTM5
DDIT4	IKBKG	LAT
DDX3X	IL10	LAT2
DDX47	IL10RA	LGALS9
DDX5	IL4	LGMN
DEDD	IRGM	LIPA
DEDD2	ITPR1	LRRK2
DELE1	KAT5	LYN
DEPTOR	KAT8	M6PR
DIABLO	KDM4A	MAN2B1
DIDO1	KDR	MANBA
DNAJA1	KEAP1	MAP1LC3A
DNAJC10	KIF25	MAP6
DNM1L	KLHL22	MCOLN1
DPF2	KLHL3	MFSD8
DYRK2	LACRT	MILR1
E2F1	LAMP1	MRGPRX2
E2F2	LAMP2	MT3
EDA2R	LAMP3	MYH9
EIF2AK3	LAMTOR1	NAGA
ELL3	LAMTOR2	NAGLU
ENO1	LAMTOR3	NAGPA
EP300	LAMTOR4	NAPSA
EPHA2	LAMTOR5	NCOA4
EPO	LARP1	NDEL1
ERBB3	LEP	NEDD4
ERCC6	LEPR	NEU1
ERN1	LGALS8	NPC1
ERN2	LRRK2	NPC2
ERO1A	LRSAM1	NR4A3
ERP29	LZTS1	PDPK1
EYA1	MAP1LC3A	PIK3C3
EYA2	MAP1LC3B	PIK3CD
EYA3	MAP1LC3C	PIK3CG
EYA4	MAP3K7	PIP4K2A
FADD	MAPK15	PIP4K2B
FAF1	MAPK3	PIP4P1
FAIM	MAPK8	PLA2G15
FAIM2	MAPT	PLA2G3
FAM162A	MCL1	PLEKHM1
FAS	MEFV	PLEKHM2
FASLG	MET	PPT1
FASTK	MFN2	PPT2
FBH1	MFSD8	PSAP
FBXW7	MID2	PSAPL1
FEM1B	MIR199A1	PTGDR
FGA	MIRLET7B	PTGDS
FGB	MLST8	RAB34
FGF10	MT3	RAB3A
FGFR1	MTCL1	RAB7A
FGFR3	MTDH	RAC2
FGG	MTM1	RUBCNL
FHIT	MTMR3	S100A13
FIGNL1	MTMR4	SCARB2
FIS1	MTMR8	SGSH
FNIP2	MTMR9	SLC11A1
FXN	MTOR	SLC11A2
FYN	NCOA4	SLC17A5
FZD9	NEDD4	SMPD1
G0S2	NLRP6	SNAP23
GABARAP	NOD1	SNAPIN
GATA1	NOD2	SNX16
GATA4	NPC1	SNX4
GCLM	NPRL2	SORL1
GDNF	NRBP2	SORT1
GFRAL	NUPR1	SPAG9
GGCT	OPTN	SPHK2
GHITM	ORMDL3	SQSTM1
GNAI2	OSBPL7	STXBP1
GNAI3	PAFAH1B2	STXBP2
GPER1	PARK7	SUMF1
GPX1	PHB2	SYK
GRINA	PHF23	SYTL4
GSDME	PIK3C2A	TCIRG1
GSK3A	PIK3C3	TFEB
GSK3B	PIK3CA	TMEM106B
GSKIP	PIK3CB	TPP1
GSTP1	PIK3R2	UNC13D
GZMB	PIM2	VAMP7
HDAC1	PINK1	VAMP8
HERPUD1	PIP4K2A	VPS33A
HGF	PIP4K2B	VPS33B
HIC1	PIP4K2C	VPS4A
HIF1A	PJVK	WASH3P
HINT1	PLEKHF1	ZFYVE16
HIP1	PLK2
HIP1R	PLK3
HIPK1	POLDIP2
HIPK2	PRKAA1
HMGB2	PRKAA2
HMOX1	PRKAB1
HNRNPK	PRKAB2
HRAS	PRKACA
HRK	PRKAG1
HSPA1A	PRKAG2
HSPA1B	PRKAG3
HSPB1	PRKD1
HTRA2	PRKN
HTT	PSAP
HYAL2	PTPN22
HYOU1	PYCARD
ICAM1	QSOX1
IFI16	RAB39B
IFI27	RAB3GAP1
IFI27L1	RAB3GAP2
IFI27L2	RAB7A
IFI6	RAB8A
IFNB1	RALB
IFNG	RASIP1
IGF1	RB1CC1
IKBKE	RETREG1
IL12A	RETREG3
IL19	RHEB
IL1A	RIPK2
IL1B	RMC1
IL2	RNF152
IL20RA	RNF41
IL33	RNF5
IL4	ROCK1
IL6R	RPTOR
IL7	RRAGA
INCA1	RRAGB
ING2	RRAGC
ING5	RRAGD
INHBA	RUBCN
INHBB	RUFY4
INS	SCFD1
ITGA6	SCOC
ITGAM	SEC22B
ITGAV	SESN1
ITM2C	SESN2
ITPR1	SESN3
ITPRIP	SH3BP4
IVNS1ABP	SH3GLB1
JAK2	SIRT1
JMY	SIRT2
JUN	SLC38A9
KDM1A	SMCR8
KITLG	SMG1
KRT18	SNCA
KRT8	SNRNP70
LCK	SNX32
LGALS12	SNX5
LGALS3	SNX6
LRRK2	SOGA1
LTBR	SOGA3
LY96	SPTLC1
MADD	SPTLC2
MAEL	SQSTM1
MAGEA3	SREBF1
MAP2K5	SREBF2
MAP3K5	STAT3
MAPK7	STBD1
MAPK8	STING1
MAPK8IP1	STK11
MAPK8IP2	STUB1
MAPK9	SUPT5H
MARCHF7	SVIP
MAZ	SYNPO2
MCL1	TAB2
MDM2	TAB3
MELK	TBC1D14
MFF	TBC1D25
MIF	TBK1
MIR132	TEX264
MIR15A	TFEB
MIR16-1	TICAM1
MIR17	TIGAR
MIR198	TLK2
MIR21	TMEM150A
MIR210	TMEM150B
MIR221	TMEM150C
MIR222	TMEM39A
MIR26B	TMEM39B
MIR27B	TMEM59
MIR449A	TOMM7
MKNK2	TP53
MLH1	TP53INP1
MLLT11	TP53INP2
MMP9	TPCN1
MNT	TPCN2
MOAP1	TREM2
MPV17L	TRIB3
MSH2	TRIM13
MSH6	TRIM14
MSX1	TRIM21
MUC1	TRIM22
MUL1	TRIM27
MYBBP1A	TRIM34
NACC2	TRIM38
NANOS3	TRIM5
NBN	TRIM6
NCK1	TRIM65
NCK2	TRIM68
NDUFA13	TRIM8
NDUFS3	TRIML1
NFATC4	TRIML2
NFE2L2	TSC1
NGF	TSC2
NGFR	TSPO
NKX3-1	UBA5
NLE1	UBQLN1
NME5	UBQLN2
NMT1	UBQLN4
NOC2L	UCHL1
NOG	UFC1
NOL3	UFL1
NONO	UFM1
NOS3	ULK1
NOX1	USP10
NR4A2	USP13
NUPR1	USP30
OPA1	USP33
P2RX4	USP36
P2RX7	UVRAG
P4HB	VDAC1
PAK2	VPS13C
PAK5	VPS13D
PARK7	VPS26A
PARP1	VPS26B
PARP2	VPS35
PAWR	WAC
PCGF2	WASHC1
PDCD10	WDFY3
PDCD5	WDR24
PDCD6	WDR41
PDIA3	WDR6
PDK1	WDR81
PDK2	WIPI2
PDPK1	ZC3H12A
PDX1	ZKSCAN3
PEA15	ZMPSTE24
PELI3
PERP
PF4
PHIP
PHLDA3
PIAS4
PIDD1
PIH1D1
PIK3R1
PINK1
PLAGL2
PLAUR
PLEKHF1
PLSCR3
PMAIP1
PML
POLB
POU4F1
POU4F2
PPARD
PPIA
PPIF
PPM1F
PPP1CA
PPP1R13B
PPP1R15A
PPP2R1B
PPP3CC
PPP3R1
PRDX2
PRELID1
PRKCA
PRKCD
PRKDC
PRKN
PRKRA
PRODH
PSEN1
PSMD10
PSME3
PTEN
PTGIS
PTH
PTPMT1
PTPN1
PTPN2
PTPRC
PTTG1IP
PYCARD
QARS1
RACK1
RAF1
RB1
RB1CC1
RBCK1
RELA
RET
RFFL
RHOT1
RHOT2
RIPK1
RIPK3
RNF183
RNF186
RNF34
RNF41
RPL11
RPL26
RPS27L
RPS3
RPS6KB1
RPS7
RRP8
RTKN2
RTL10
S100A8
S100A9
SCG2
SCN2A
SCRT2
SELENOK
SELENOS
SENP1
SEPTIN4
SERINC3
SERPINE1
SFN
SFPQ
SFRP1
SFRP2
SGMS1
SGPL1
SGPP1
SH3RF1
SHH
SHISA5
SIAH1
SIAH2
SIRT1
SIVA1
SKIL
SLC25A5
SLC35F6
SLC9A3R1
SMAD3
SNAI1
SNAI2
SNW1
SOD1
SOD2
SORT1
SP100
SRC
SRPX
SST
SSTR3
ST20
STK11
STK24
STK25
STK3
STK4
STRADB
STX4
STYXL1
SYVN1
TAF9
TAF9B
TCF7L2
TERT
TFDP1
TFDP2
TFPT
TGFB1
TGFB2
TGFBR1
THBS1
TICAM1
TICAM2
TIMM50
TIMP3
TLR3
TLR4
TM2D1
TMBIM1
TMBIM6
TMC8
TMEM102
TMEM109
TMEM117
TMEM14A
TMEM161A
TNF
TNFAIP3
TNFRSF10A
TNFRSF10B
TNFRSF10C
TNFRSF12A
TNFRSF1A
TNFRSF1B
TNFRSF25
TNFSF10
TNFSF12
TOPORS
TP53
TP53BP2
TP63
TP73
TPD52L1
TPT1
TRADD
TRAF1
TRAF2
TRAF7
TRAP1
TRIAP1
TRIB3
TRIM32
TRIM39
TXNDC12
TYROBP
UACA
UBB
UBE2K
UBE4B
UBQLN1
UMOD
UNC5B
URI1
USP28
USP47
VDAC2
VNN1
WDR35
WNT4
WWOX
XBP1
YAP1
YBX3
YWHAB
YWHAE
YWHAG
YWHAH
YWHAQ
YWHAZ
ZC3HC1
ZDHHC3
ZMYND11
ZNF205
ZNF385A
ZNF385B
ZNF622
ZSWIM2
