# Supplementary material for: Revealing prognostic insights of programmed cell death (PCD)-associated genes in advanced non-small cell lung cancer
Source: Aging (Albany NY). 2024 May 8;16(9):8110–41. doi: 10.18632/aging.205807 (PMC11131998; doi:10.18632/aging.205807)
Supplement: Supplementary Table 3 [file aging-16-205807-s004.xlsx]

## Sheet: Sheet1
Supplementary Table 3. The 359 DEGs were identified between cluster 1 and cluster 2.
ENSEMBL	logFC	AveExpr	t	P.Value	adj.P.Val	B
LINC02864	3.01061	-0.8422	3.51032	0.000553399	0.0106833	-0.488395
AKR1C2	2.8486	5.71887	3.62048	0.000372941	0.00854779	-0.0644766
GPX2	2.61225	4.99734	3.37389	0.000890587	0.0142405	-0.81156
CX3CL1	-2.6012	5.92942	-12.1783	7.25188e-26	1.50513e-21	47.2878
INSL4	2.54433	-3.75791	3.61746	0.000377043	0.00859003	-0.364178
SERPINB5	2.49604	3.76287	2.99719	0.00307128	0.0303903	-1.82576
CPS1	2.48001	2.59456	3.14934	0.00188813	0.0223422	-1.38259
MUC21	-2.4337	1.66943	-3.96571	0.000101994	0.00410248	1.13147
CASC9	2.41878	1.0294	3.31313	0.00109567	0.0160711	-0.941034
GLB1L3	-2.4144	-0.291447	-5.00864	1.20456e-06	0.000347231	4.92763
IL37	-2.36967	-2.81955	-4.6864	5.14504e-06	0.000672509	3.37309
XIST	-2.35831	-0.51012	-3.02917	0.00277703	0.02859	-1.69945
APOH	-2.34029	-1.49472	-4.73401	4.16995e-06	0.000631732	3.70894
BARX1	2.33669	1.01826	3.37167	0.000897401	0.0142994	-0.776092
KLK8	2.27519	-1.14727	3.20224	0.00158746	0.0201023	-1.30032
ADGRF1	-2.25218	3.48491	-5.97846	1.02485e-08	2.12707e-05	9.61219
SLC34A2	-2.24982	8.0955	-4.57049	8.52624e-06	0.000921678	3.30023
CA10	-2.23379	-3.85558	-4.48133	1.24957e-05	0.0011425	2.50197
SLC6A15	2.21307	-0.731865	2.86249	0.0046525	0.039705	-2.12152
NAPSA	-2.14475	7.06429	-3.78787	0.00020114	0.00608553	0.365717
SHISA3	-2.10079	-0.0133526	-5.22699	4.33239e-07	0.000224797	5.83481
VSIG1	-2.05891	1.75172	-4.86553	2.31517e-06	0.000462032	4.52337
GGTLC1	-2.05233	-0.395995	-4.03645	7.73474e-05	0.00347477	1.31381
SFTPA1	-2.02959	7.31345	-3.01699	0.00288592	0.0293238	-2.05322
AKR1C1	2.01762	5.83137	3.21038	0.00154531	0.0197493	-1.38964
SFTPA2	-2.00331	7.89988	-3.0349	0.00272709	0.0283003	-2.00057
UCHL1	1.99759	5.05656	3.98104	9.60896e-05	0.00394138	1.15886
CYP4F3	1.97033	1.69936	2.77623	0.0060235	0.0466544	-2.33296
NMRAL2P	1.96302	1.81069	3.13659	0.00196807	0.0229222	-1.41421
CD207	-1.95694	0.647796	-5.62424	6.24329e-08	7.62232e-05	7.62666
AQP4	-1.94258	3.38228	-4.02757	8.00967e-05	0.00350662	1.30299
LINC01322	1.9233	-3.18208	3.96851	0.000100892	0.00407316	0.666156
PIGR	-1.90948	6.05222	-3.91176	0.000125641	0.00464827	0.802704
LRRN4	-1.8959	1.25182	-4.92645	1.75592e-06	0.000400897	4.73063
ASNSP1	1.87948	-3.79299	3.54495	0.000489313	0.0100155	-0.55211
WDR72	1.87364	3.19485	2.88763	0.00431028	0.0378106	-2.10353
TDRD5	1.87084	0.710092	3.52247	0.000530067	0.0104083	-0.345064
FZD10	1.84918	1.6001	3.3521	0.000959603	0.0148631	-0.816864
DACT2	1.82343	1.08124	3.3163	0.00108394	0.0159328	-0.924437
PART1	1.8205	-1.30321	3.02566	0.00280795	0.0288224	-1.73824
S100P	1.79731	4.86552	2.80531	0.005525	0.044326	-2.43344
LINC01807	1.79701	-2.89164	3.16396	0.00180014	0.0216968	-1.465
ETNPPL	1.78996	-3.90912	3.24313	0.00138614	0.0183829	-1.31895
C16orf89	-1.78512	3.97431	-3.9297	0.000117251	0.00444076	0.928423
PRDM13	1.77795	-3.0445	3.22332	0.00148049	0.0192167	-1.32604
GLDC	1.76953	0.895963	4.3734	1.96996e-05	0.00151129	2.41812
DLL3	1.76898	-0.431235	3.20086	0.0015947	0.0201154	-1.26918
NKX2-1	-1.76395	4.40153	-3.49213	0.000590135	0.0110544	-0.564115
PPP2R2C	1.76316	2.53009	2.76807	0.00617065	0.0473005	-2.37845
CYCSP6	1.7615	-2.41513	3.06048	0.00251424	0.0267468	-1.6921
KLHDC7A	-1.753	0.780794	-4.20691	3.91191e-05	0.00230005	1.95229
AKR1C4	1.74366	-2.51855	3.33852	0.00100513	0.0152626	-1.00208
ATP13A4	-1.72766	2.82142	-4.92555	1.76318e-06	0.000400897	4.80956
C12orf56	1.72595	0.400001	2.99769	0.00306652	0.0303653	-1.77879
GAL	1.72149	0.165161	3.43366	0.000724297	0.0124016	-0.61447
NSA2P3	-1.71119	-2.50674	-4.61421	7.05497e-06	0.000831966	3.11419
PCSK1	1.70598	0.551449	3.50997	0.000554082	0.0106833	-0.382331
CD1A	-1.69742	0.678143	-5.01751	1.15622e-06	0.000347231	5.02856
SLC1A7	-1.69177	0.461386	-4.05059	7.31521e-05	0.00335168	1.39454
LINC01419	1.68588	-4.0339	2.75589	0.00639616	0.0484321	-2.42468
MYBPH	-1.68384	-1.48991	-4.05932	7.06732e-05	0.00331552	1.31159
SCN1A	-1.68123	-1.09023	-4.3204	2.45604e-05	0.00173976	2.2257
BRINP1	-1.67715	-1.05724	-3.47432	0.000628298	0.0114579	-0.478786
KCNMB2-AS1	1.66795	0.770484	2.86628	0.00459938	0.039365	-2.10529
ANXA13	1.6641	-2.26462	3.66802	0.000313626	0.00774334	-0.0910555
LINC00707	1.66392	-2.37033	3.33848	0.00100525	0.0152626	-0.991318
HHLA2	-1.65746	-0.101197	-3.55926	0.000464925	0.00970747	-0.204422
SCGB1A1	-1.65228	2.40727	-2.95151	0.00354159	0.0334269	-2.00697
ALB	-1.62973	-2.37443	-3.50844	0.000557086	0.0106838	-0.429893
MUC16	-1.61959	3.1684	-3.2414	0.00139413	0.0184327	-1.25139
DISP3	-1.6193	-1.7901	-4.42455	1.58933e-05	0.00130899	2.52054
PITX2	1.61877	0.791477	2.83191	0.00510209	0.0423406	-2.18888
CTSE	-1.61287	4.68598	-2.9963	0.00307986	0.0304526	-2.0626
CAPN8	-1.60512	3.51017	-3.64892	0.000336297	0.00799524	0.000355667
CA12	1.60266	5.22566	3.51125	0.000551574	0.0106691	-0.4402
FCGBP	-1.59781	4.14281	-5.423	1.68609e-07	0.000121013	6.99738
HHIP	-1.59402	1.1769	-3.62902	0.000361559	0.00839391	0.0230511
ITPRID1	-1.58027	-2.57657	-3.34618	0.000979191	0.0150541	-0.889107
MUCL1	1.57703	-2.03674	2.85837	0.00471079	0.0399723	-2.14835
MFSD4A	-1.577	3.30158	-5.36278	2.25887e-07	0.000146509	6.7159
LINC01611	1.57513	-4.01297	3.58348	0.000426247	0.0092346	-0.456103
DRGX	-1.57281	-2.71798	-3.32183	0.0010638	0.0158273	-0.961186
ROS1	-1.57065	3.90903	-3.86352	0.000151108	0.00519248	0.703935
LINC01697	1.57051	-2.95737	3.02311	0.00283066	0.028941	-1.79847
ABCC2	1.56744	1.33381	2.79243	0.00574096	0.0452883	-2.29126
B3GAT1	-1.56281	-0.149871	-4.92146	1.79636e-06	0.000400897	4.54162
AQP1	-1.5537	6.93604	-5.31729	2.81326e-07	0.000166826	6.50109
POPDC3	1.54603	-0.20316	2.76545	0.00621854	0.0475206	-2.34251
DCAF12L2	1.54324	-3.35536	3.33556	0.00101528	0.0153476	-1.0581
ANKRD34B	-1.54164	-1.75234	-3.45073	0.000682425	0.0119813	-0.569989
SPX	1.54135	-1.52038	2.91478	0.00396663	0.0359038	-2.00545
CD1E	-1.54022	-0.197532	-5.45742	1.42506e-07	0.000117102	6.71764
C10orf90	1.53671	-3.42286	3.20737	0.00156078	0.0198858	-1.37984
CHIAP2	-1.53365	-4.01894	-3.59021	0.000416042	0.00913069	-0.309807
LINC02888	-1.52596	-2.40905	-4.33067	2.35364e-05	0.00168126	2.12857
GNG4	1.52369	2.21983	2.98509	0.0031899	0.0312147	-1.82369
RASGRF1	-1.52212	1.64203	-4.68885	5.08997e-06	0.000672509	3.79445
NKX2-1-AS1	-1.51963	0.214802	-3.02592	0.00280564	0.0288129	-1.71115
CPA4	1.51584	-0.992549	2.8944	0.00422214	0.0373372	-2.0443
C4BPA	-1.51435	4.34293	-2.86281	0.00464789	0.039682	-2.40394
HLA-DQB2	-1.51194	4.29019	-4.94606	1.60556e-06	0.000389872	4.88944
CX3CR1	-1.50781	0.733171	-6.11367	5.04591e-09	1.49611e-05	9.81199
LRRTM1	-1.50282	-3.62569	-3.19919	0.00160349	0.0201659	-1.32271
LRRC31	-1.50184	-1.42399	-3.03353	0.00273899	0.0283671	-1.68816
LMO3	-1.48804	3.89761	-3.56826	0.000450177	0.00958653	-0.286104
ATP13A4-AS1	-1.48765	-3.87773	-4.11497	5.66509e-05	0.00286778	1.25134
MUCL3	-1.48003	-0.677682	-3.30539	0.00112474	0.0162903	-0.954659
INHA	1.47684	0.00386078	2.75406	0.00643075	0.0484709	-2.36964
CYP4B1	-1.47588	3.43457	-3.49603	0.000582059	0.0109606	-0.485469
FCER1A	-1.4712	0.083005	-4.27599	2.94999e-05	0.00194371	2.14624
RPS29P11	-1.4699	-2.41078	-3.95282	0.000107226	0.00423093	0.892207
ELOVL4	1.45235	0.849754	3.92781	0.00011811	0.00446514	0.919674
MUC3A	-1.45177	2.06379	-3.41004	0.000786205	0.0131346	-0.671365
MUC22	-1.45114	-3.0704	-3.49658	0.00058093	0.0109511	-0.505928
SHC3	-1.44751	1.90211	-6.3121	1.75156e-09	9.0067e-06	11.0092
TGM3	1.44435	-0.834724	2.92559	0.00383695	0.0352199	-1.967
RAD17P1	-1.4405	-3.87712	-4.34096	2.25524e-05	0.00163662	1.97185
NOL4	1.43932	-2.95447	2.915	0.0039639	0.0358948	-2.04422
SLC6A20	-1.43678	0.111035	-3.87598	0.0001441	0.00502655	0.790698
FAM189A2	-1.43606	1.83862	-5.16398	5.83769e-07	0.000247718	5.74773
AKR1C3	1.43264	6.06037	2.82683	0.00518047	0.0427517	-2.51236
CALCB	1.43032	-2.73941	3.06058	0.00251341	0.0267468	-1.6969
NEIL3	1.42277	2.04549	5.70697	4.12071e-08	6.10896e-05	7.90634
SCGB3A1	-1.41812	3.34149	-3.01113	0.00293963	0.0296606	-1.91693
CLDN18	-1.41136	1.95988	-2.8489	0.00484765	0.0407835	-2.23205
HPGD	-1.40534	4.46507	-3.96806	0.000101068	0.00407316	1.04698
PRODH	-1.4025	3.50071	-4.5081	1.11474e-05	0.00107893	3.1124
HLF	-1.39878	2.717	-4.77743	3.43813e-06	0.000566336	4.19275
GAS2L2	-1.397	-1.71469	-3.58352	0.000426173	0.0092346	-0.188435
SLC7A11	1.39169	4.76893	3.55899	0.000465379	0.00970747	-0.273109
CABYR	1.38523	2.68259	3.63347	0.000355764	0.00830584	0.0369071
LSAMP-AS1	1.37039	-3.70167	3.18969	0.00165444	0.0205713	-1.43266
TMEM74	1.36969	-2.26511	3.95095	0.000108004	0.00424552	0.753075
NDNF	-1.36873	3.75392	-3.77912	0.000207846	0.00614508	0.425314
PAPPA2	1.36824	-1.54958	3.31871	0.00107514	0.0159196	-0.991103
NPW	1.3681	-0.493442	3.37318	0.000892755	0.0142472	-0.799556
ADGRF5	-1.36407	5.85146	-4.87968	2.1716e-06	0.000441877	4.58278
SLC30A10	1.36381	-4.09757	3.26549	0.00128636	0.0175532	-1.26539
ABCA4	-1.36076	2.00009	-3.12438	0.00204759	0.0234875	-1.49858
PTPRN	1.36012	0.0824547	3.10845	0.00215572	0.0242767	-1.49576
DLX2	1.35778	-3.27824	2.9195	0.00390946	0.0356193	-2.04385
FAM230C	1.3536	-4.79976	3.01047	0.00294575	0.029708	-1.88025
KIAA0408	-1.35289	-3.93313	-4.63999	6.30544e-06	0.000765318	2.95373
LINC00342	-1.35155	2.49112	-5.17109	5.64521e-07	0.000247718	5.83025
LINC01116	1.34917	0.654518	3.52583	0.000523772	0.0103718	-0.327061
KRT83	1.34478	-2.98917	2.82236	0.00525038	0.04314	-2.25053
DPP4	-1.34347	4.64956	-3.71016	0.000268609	0.00707484	0.145104
SLC15A1	1.34034	0.460041	2.77378	0.00606736	0.0468134	-2.32665
CYP2B7P	-1.33931	3.75951	-3.025	0.00281382	0.0288458	-1.90747
AKR1C7P	1.33259	-1.33861	3.05275	0.00257685	0.0271484	-1.66354
FGF12	1.33194	1.60176	3.28146	0.00121924	0.0170776	-1.01502
NWD1	-1.33075	0.0395256	-3.54363	0.00049162	0.0100427	-0.253291
NKX2-3	1.31944	-3.1613	2.9461	0.00360142	0.033853	-1.97976
ELFN2	-1.31624	-1.70565	-3.74453	0.000236483	0.00652496	0.290909
CNTN6	-1.31347	-2.10284	-3.65891	0.000324254	0.00787123	0.0118547
SLC16A9	-1.31232	3.00214	-3.74675	0.000234538	0.00652126	0.361591
C8orf34-AS1	-1.31206	-0.0979337	-3.14047	0.00194338	0.0227239	-1.4035
SULT1C2	-1.31039	1.71742	-3.70133	0.000277508	0.00721208	0.251568
POF1B	1.31022	3.13874	2.89975	0.00415364	0.0369519	-2.08389
STK32A	-1.30805	2.10657	-3.35657	0.000945058	0.0147281	-0.830338
CD1C	-1.30624	0.65044	-5.09628	8.0201e-07	0.000286483	5.31861
CYP21A1P	-1.30571	-2.45822	-4.3303	2.35725e-05	0.00168126	2.10916
HOXD1	-1.30506	-0.406047	-3.74822	0.000233263	0.00652126	0.360126
PBK	1.30124	3.50719	5.20081	4.90544e-07	0.00024349	5.91943
SPTB	-1.29992	2.4069	-3.66791	0.000313763	0.00774334	0.128046
SCTR	-1.29282	1.31098	-3.16822	0.00177524	0.021484	-1.34646
NMNAT2	-1.2879	1.4774	-3.35992	0.000934286	0.0146488	-0.799574
TRIM16L	1.28681	3.86293	3.50216	0.000569592	0.0108036	-0.402704
TCF24	1.28332	-1.92709	3.26611	0.0012837	0.0175314	-1.14273
SPINK4	1.28076	-4.01708	2.84912	0.00484446	0.0407827	-2.22292
SLC22A31	-1.27702	3.64221	-2.75501	0.00641276	0.0484517	-2.62061
RHOXF1-AS1	-1.26963	-0.362209	-3.50824	0.000557481	0.0106838	-0.367733
SCAT8	1.26919	0.126617	2.85644	0.00473849	0.0401418	-2.12766
F11	-1.26835	-2.88288	-3.28142	0.00121942	0.0170776	-1.08283
HNRNPA1P27	-1.26727	-1.09996	-3.67121	0.000309984	0.00769192	0.0960951
CBX2	1.26722	4.1669	4.45319	1.40814e-05	0.00122798	2.90998
ALOX15P2	-1.26516	-4.03624	-2.90574	0.00407814	0.0366097	-2.05162
MS4A15	-1.26388	-0.256127	-2.97239	0.00331895	0.0320235	-1.84363
MACC1	-1.26179	4.52538	-4.81282	2.93501e-06	0.000507635	4.32366
KCNK5	-1.25997	4.01353	-4.36656	2.02703e-05	0.00152986	2.54683
TMPRSS2	-1.25888	4.69047	-3.58786	0.000419579	0.00918603	-0.262082
CLEC4F	-1.25384	-2.61312	-4.17125	4.51954e-05	0.0025185	1.56243
PFN2	1.2522	6.96987	4.81721	2.8778e-06	0.000507635	4.32131
GCAWKR	-1.2443	-1.02238	-3.74473	0.000236306	0.00652496	0.322274
LINC01644	-1.24393	-2.1249	-3.23578	0.00142049	0.0186596	-1.17709
CRYM	-1.24347	1.4434	-3.0007	0.00303763	0.0302234	-1.80649
SELENOOLP	1.24308	-4.37542	2.81244	0.00540858	0.0437411	-2.30848
SCTR-AS1	-1.24291	-2.46442	-3.13966	0.00194855	0.0227715	-1.43699
CD1B	-1.24268	-1.98061	-3.90429	0.0001293	0.00473302	0.763629
CPB2	-1.24078	-1.42928	-2.83516	0.00505244	0.0419958	-2.17861
SUSD2	-1.2397	4.72609	-3.89478	0.0001341	0.00479372	0.778552
RETN	-1.23833	-1.35441	-3.74933	0.0002323	0.00651088	0.321304
XKRX	-1.23804	1.76729	-3.81377	0.000182468	0.00574679	0.619408
CCL17	-1.2356	-0.395584	-4.37107	1.98927e-05	0.00151792	2.44028
BMP3	-1.2341	2.34743	-2.73962	0.00670929	0.0498055	-2.53742
SFTA1P	-1.23106	1.29459	-3.18192	0.00169727	0.0208442	-1.30577
B3GNT7	-1.22829	4.65119	-4.49693	1.16918e-05	0.00110805	3.03475
OIP5	1.22733	1.83816	5.52788	1.00771e-07	9.95949e-05	7.10542
GDF5	-1.22487	-1.60443	-3.75346	0.000228751	0.00646829	0.320501
DUXAP9	1.22479	-1.23141	3.39964	0.00081499	0.0134247	-0.75206
LEP	1.22373	-2.18383	2.93592	0.00371654	0.0345595	-1.96743
HAS3	-1.2147	5.29061	-3.41412	0.000775165	0.0129851	-0.84469
CACNA2D2	-1.21365	3.25784	-3.67193	0.000309169	0.00769192	0.101823
BCL2L10	1.21142	-0.550071	3.15521	0.00185232	0.022082	-1.38304
SLC16A14	1.20706	3.94739	3.37001	0.000902513	0.0143318	-0.812606
ICAM1	-1.20655	7.03145	-4.90641	1.92362e-06	0.000410758	4.69115
C7orf57	-1.20467	-0.748112	-3.76345	0.000220387	0.00635569	0.391626
RN7SKP51	-1.20429	-4.23392	-3.75514	0.000227327	0.00644559	0.122456
GGT2P	-1.20255	-2.54555	-3.77465	0.000211352	0.00621562	0.326254
LINC00589	1.2009	-3.07055	3.11473	0.00211252	0.0239592	-1.57703
SLAMF9	1.19866	-0.112018	3.81521	0.000181474	0.00573376	0.52036
ADH1B	-1.19792	2.5641	-2.84607	0.00488912	0.0410326	-2.27883
COL4A3	-1.19646	2.28001	-3.53171	0.000512946	0.0102466	-0.299175
BNIP5	-1.19611	-1.92628	-3.45584	0.000670351	0.0118814	-0.569053
CGREF1	1.19461	2.18537	3.38981	0.000843093	0.0137135	-0.70344
BMP5	-1.19192	1.69165	-3.35986	0.000934473	0.0146488	-0.805106
CASR	-1.19134	-3.78778	-3.03926	0.00268971	0.0280105	-1.73041
RHEX	-1.18951	0.344957	-4.70703	4.69822e-06	0.000651297	3.74081
LRCOL1	-1.18923	-3.03404	-4.30386	2.62998e-05	0.00180383	1.94333
VSIG2	-1.18815	2.13214	-3.2793	0.00122815	0.0171406	-1.05475
DPP4-DT	-1.18745	-3.60806	-3.30636	0.00112103	0.0162842	-1.05546
CDH20	-1.18732	-3.03038	-4.11869	5.58151e-05	0.00283932	1.34597
GGH	1.18655	4.91793	4.90429	1.94224e-06	0.000410758	4.72408
CFTR	-1.18645	1.96773	-3.15125	0.0018764	0.0222191	-1.41296
FZD10-AS1	1.18515	1.24962	2.90881	0.00403994	0.0363297	-2.00635
ECEL1P2	-1.18057	-2.57397	-3.03936	0.0026888	0.0280105	-1.69408
EPHA10	-1.17944	1.25316	-2.8429	0.00493616	0.0413105	-2.20657
MUC1	-1.17194	8.0026	-3.19565	0.00162229	0.0202855	-1.53717
CPAMD8	-1.17079	2.94941	-4.23986	3.42074e-05	0.00212567	2.10314
SEPTIN9-DT	-1.16713	-2.29138	-3.93887	0.000113174	0.00439051	0.84688
PPP1R1B	-1.16704	3.10605	-2.8546	0.00476489	0.0402668	-2.31246
CFAP100	-1.16305	-2.05782	-3.5228	0.000529452	0.0104083	-0.385585
CLGN	1.1618	1.25707	3.09832	0.00222724	0.0247974	-1.51634
ABCA3	-1.16019	6.06732	-3.49822	0.000577577	0.0109077	-0.595012
MEGF11	-1.15981	-1.2249	-3.60354	0.000396503	0.00886116	-0.113899
RPL13AP17	-1.15741	-3.09842	-2.9981	0.00306255	0.0303596	-1.80873
SRXN1	1.15693	2.02394	3.42303	0.000751555	0.0127127	-0.605603
ALPL	-1.15604	5.03145	-3.93318	0.00011569	0.00443314	0.903454
CDKN3	1.15324	3.43931	4.76286	3.66867e-06	0.00059487	4.10702
ARTN	1.15294	1.85861	2.83814	0.00500735	0.0417151	-2.19518
CRTAC1	-1.15048	2.66449	-3.19587	0.00162113	0.0202855	-1.32821
OTOG	1.1478	-4.25016	3.33912	0.00100307	0.0152626	-1.08649
LRRC52-AS1	-1.14401	-3.6795	-2.92461	0.00384846	0.0352803	-1.99884
LRRK2	-1.14371	4.52812	-3.64558	0.000340416	0.00805739	-0.0616162
LINC02898	-1.14331	-3.24593	-3.96984	0.00010037	0.0040687	0.852854
PPP1R26P1	-1.14291	-3.72228	-3.633	0.000356363	0.00830816	-0.180959
DMBX1	-1.14187	-1.47397	-2.89457	0.00421993	0.0373372	-2.03548
ARMC3	-1.14128	-0.198424	-2.86724	0.00458599	0.039299	-2.10756
ESYT3	-1.13889	2.33191	-4.33692	2.29336e-05	0.00165273	2.46584
TROAP	1.13542	4.12349	4.74875	3.90622e-06	0.000605026	4.07694
LINC02889	-1.13478	0.13018	-2.95548	0.00349824	0.0332122	-1.89007
DRC1	-1.13294	-0.716908	-3.08846	0.00229894	0.0252859	-1.54316
GREP1	-1.13065	-2.73288	-3.48189	0.000611794	0.0112786	-0.534541
TMSB15A	1.1256	-1.00451	3.48255	0.000610391	0.0112786	-0.509576
CLDN9	-1.12461	0.356847	-2.89786	0.00417766	0.0371338	-2.04056
CLIC5	-1.12303	3.0308	-3.81815	0.000179475	0.00569574	0.606027
ALDOB	-1.12155	-2.2334	-3.5188	0.00053701	0.0105048	-0.405467
PRDM16	-1.12053	1.70857	-3.65097	0.000333793	0.00797223	0.091193
LIPH	-1.11961	4.62827	-3.68107	0.00029898	0.00757671	0.0511929
SHH	-1.11088	0.920356	-2.91954	0.00390905	0.0356193	-1.99854
IGSF9B	-1.11026	0.0957141	-3.40498	0.000800078	0.0133058	-0.663277
HHIP-AS1	-1.10955	-0.248949	-3.34286	0.000990346	0.015136	-0.845853
ODC1	1.10885	7.51667	4.97435	1.41044e-06	0.000365921	4.98469
PTPN13	-1.10763	5.51003	-4.61056	7.1677e-06	0.000835762	3.47056
MIR4713HG	1.10479	-2.58431	2.78509	0.00586749	0.0459653	-2.31959
CRLF2	-1.10424	-2.28753	-3.26245	0.00129954	0.0176403	-1.11413
ENPP3	-1.10358	0.353212	-2.78426	0.005882	0.0460335	-2.32184
PI15	1.0989	2.28035	3.8574	0.000154675	0.00525781	0.754142
TLR2	-1.09848	4.59358	-6.02366	8.09644e-09	1.9564e-05	9.85291
C1orf116	-1.09819	5.86386	-3.43806	0.000713277	0.0123162	-0.783203
ITGB1-DT	1.09632	-2.35718	2.97853	0.00325599	0.0316822	-1.87016
SLC46A2	-1.09624	-0.184684	-3.00752	0.00297322	0.0298834	-1.75329
DNAH2	-1.09619	2.8104	-3.23092	0.00144364	0.0188663	-1.23541
NKX2-8	-1.09368	-0.619518	-3.35278	0.000957367	0.0148395	-0.823939
BCRP3	-1.09304	-0.993147	-4.64563	6.1519e-06	0.000753261	3.36821
LRRK2-DT	-1.09294	0.160167	-3.13349	0.00198798	0.0230249	-1.42258
EGR4	-1.09096	-2.43487	-3.16166	0.00181374	0.0217797	-1.38143
GGT3P	-1.09092	-3.41663	-3.54291	0.00049289	0.0100427	-0.410265
CAPN13	-1.08855	3.4706	-2.81905	0.00530263	0.0433121	-2.43287
PTCSC3	-1.08436	-2.56114	-2.75535	0.00640634	0.0484514	-2.36832
CENPW	1.08396	3.39502	4.44102	1.48253e-05	0.00125592	2.85275
MMP28	-1.08312	2.57668	-3.17308	0.0017472	0.0212438	-1.38566
VEPH1	-1.08265	1.91581	-3.59093	0.00041496	0.0091234	-0.101521
C17orf50	-1.08112	-3.74907	-3.68486	0.00029485	0.00753672	-0.0388826
FAM72C	1.08092	-1.29783	4.17292	4.48902e-05	0.00251131	1.57104
ADAMTS8	-1.07828	0.213615	-3.7577	0.000225169	0.00642674	0.407576
EMB	-1.07746	5.29783	-4.71742	4.48765e-06	0.000648273	3.91189
VWA2	-1.07707	2.65061	-3.68597	0.000293644	0.00752571	0.181111
ARHGAP20	-1.07619	1.67974	-4.20561	3.93264e-05	0.0023057	1.96889
SCN7A	-1.07609	2.01368	-3.57311	0.000442424	0.00946613	-0.159657
H2BC17	1.07569	-2.63895	3.72387	0.000255334	0.0068824	0.0655341
HLA-DQA2	-1.07369	4.11769	-3.07146	0.00242762	0.0262014	-1.79847
AGER	-1.07323	3.73356	-3.29124	0.00117977	0.0167713	-1.12483
SLC4A4	-1.07221	2.95563	-3.10052	0.00221156	0.0246779	-1.61888
MYH11	-1.06979	5.61466	-3.52765	0.000520405	0.0103359	-0.490524
MMP24	-1.06944	2.56313	-3.70201	0.000276816	0.00720867	0.238465
TUBAL3	1.06802	-1.58833	2.79696	0.00566407	0.0449972	-2.27593
SLCO4A1-AS1	-1.06665	-2.01022	-3.14513	0.00191418	0.0225356	-1.414
LGALS12	-1.06643	-2.37086	-3.78925	0.000200101	0.00608553	0.376768
SCN2B	-1.06521	-1.10552	-3.90169	0.000130597	0.00473869	0.806896
ALOX15B	-1.06326	3.63372	-3.04522	0.00263933	0.0276011	-1.83356
P2RY12	-1.06007	-1.04436	-3.56617	0.000453565	0.00961345	-0.220529
TNC	-1.05923	7.60692	-3.2124	0.00153503	0.0196786	-1.48906
PNMA2	-1.05818	2.72109	-3.24555	0.00137501	0.0182821	-1.18553
CENPA	1.05746	3.02539	4.36289	2.05839e-05	0.00154231	2.5478
HPGDS	-1.05591	0.628154	-4.67706	5.36056e-06	0.00068678	3.64508
GALNT5	-1.05589	3.84613	-3.82852	0.00017258	0.00556195	0.598121
RAET1G	1.05546	-0.302603	3.08523	0.00232292	0.0254552	-1.5587
COL6A4P1	1.05482	-2.17174	3.24426	0.00138095	0.0183259	-1.2043
BASP1	1.05189	5.92967	3.85095	0.000158514	0.00531496	0.625642
LRRC37A11P	-1.05164	-3.71391	-3.57395	0.000441093	0.00944778	-0.346749
ACTBL2	-1.05135	-2.9871	-3.32987	0.00103515	0.0155122	-0.964149
LINC02772	-1.04939	-3.82959	-2.87909	0.00442386	0.0384656	-2.10954
PI16	-1.04896	-1.85424	-3.12197	0.00206359	0.0235606	-1.47065
HS6ST2	-1.04818	4.30375	-3.46081	0.000658791	0.0117776	-0.64524
MIR3189	-1.0481	-4.22575	-3.33712	0.00100993	0.0152889	-1.01685
LINC01117	1.04722	-2.69081	2.91578	0.00395443	0.0358517	-2.02589
LRRC52	-1.04576	-4.18116	-3.23076	0.0014444	0.0188663	-1.28299
MAMDC2	-1.04543	1.5744	-3.83387	0.000169123	0.00547302	0.684751
DEPDC1	1.04518	3.64424	4.29253	2.75587e-05	0.00186524	2.30179
VIPR1-AS1	-1.04446	-1.63931	-3.95317	0.000107081	0.00423093	0.936138
BAAT	-1.04437	-0.914531	-2.88087	0.00439992	0.0383538	-2.06881
MIR924HG	1.04425	-0.384296	3.0558	0.00255199	0.0270197	-1.63489
CDKL2	-1.04208	1.45241	-3.59727	0.000405586	0.00899353	-0.0764549
FAM184A	-1.03941	2.0172	-4.38834	1.8506e-05	0.00144933	2.64761
KRT32	-1.03905	-3.09246	-2.80082	0.00559939	0.0446811	-2.27134
ITGB8	-1.03891	4.87466	-3.23186	0.00143911	0.0188327	-1.3838
KCNJ15	-1.03647	4.41249	-3.65114	0.000333587	0.00797223	-0.0339388
ICAM4-AS1	-1.03172	-0.841453	-3.71369	0.000265126	0.00703544	0.230679
SORCS2	-1.03143	2.68762	-3.44537	0.000695315	0.0121271	-0.584253
EFHC2	-1.02859	0.551289	-3.91511	0.00012403	0.0046051	0.92687
RGS11	-1.02832	0.749146	-4.5259	1.03293e-05	0.00102088	3.08476
HOXC6	1.02687	1.0308	2.86859	0.00456721	0.0392065	-2.105
HMCN2	-1.02521	0.599039	-4.15344	4.85557e-05	0.00263126	1.73488
NPFFR1	-1.02464	-0.630198	-3.86509	0.000150209	0.00517757	0.712884
ADGRF5P2	-1.02393	-4.05898	-3.65469	0.000329293	0.00794555	-0.152891
LINC00592	1.02334	-2.3502	3.12191	0.002064	0.0235606	-1.52052
TM4SF19	1.02246	0.353488	2.83696	0.00502519	0.0418362	-2.17615
CTSH	-1.02214	7.62456	-5.17522	5.53638e-07	0.000247718	5.86252
CHRNA5	1.02103	1.66503	4.20831	3.88974e-05	0.00229351	1.92142
TTK	1.01998	3.82662	4.05153	7.28822e-05	0.00335168	1.42755
FMO5	-1.01668	3.45702	-3.00993	0.00295079	0.0297299	-1.91328
CSRP2	1.01491	3.98292	4.17684	4.41856e-05	0.00249089	1.87502
MYO1G	-1.01349	4.26772	-4.60519	7.33694e-06	0.00084599	3.48126
MS4A2	-1.01155	0.734145	-4.22692	3.6061e-05	0.00217571	1.99877
VWA3A	-1.0113	-1.61579	-2.79107	0.00576421	0.0454027	-2.28279
CCL22	-1.00939	2.64075	-3.95133	0.000107846	0.00424552	1.0771
STC2	1.00885	4.3034	3.35083	0.000963773	0.0148943	-0.905087
CFAP221	-1.00722	1.51552	-2.77416	0.00606062	0.04679	-2.3868
GPC4	-1.00648	5.935	-4.68256	5.23271e-06	0.000678781	3.75908
MARCO	-1.00585	3.87933	-3.14858	0.0018928	0.0223652	-1.55992
LINC02970	-1.00528	-2.68201	-3.4526	0.000677996	0.0119455	-0.617355
DNAH11	-1.00461	2.04275	-3.26267	0.00129856	0.0176385	-1.09661
SYTL2	-1.00407	4.40086	-5.13726	6.6197e-07	0.000264215	5.7177
TMEM63C	-1.00312	2.17423	-3.1315	0.00200088	0.0231613	-1.47829
HAGLR	-1.00204	3.89867	-3.58281	0.000427271	0.00924715	-0.224774
SKA1	1.00198	2.97561	4.23264	3.52303e-05	0.00215694	2.07026
SCUBE3	-1.00128	2.67279	-3.47187	0.000633731	0.0115277	-0.501077
DLGAP5	1.0002	4.30016	4.58927	7.86115e-06	0.000886729	3.44056
