# Supplementary material for: Revealing prognostic insights of programmed cell death (PCD)-associated genes in advanced non-small cell lung cancer
Source: Aging (Albany NY). 2024 May 8;16(9):8110–41. doi: 10.18632/aging.205807 (PMC11131998; doi:10.18632/aging.205807)
Supplement: Supplementary Table 4 [file aging-16-205807-s005.xlsx]

## Sheet: Sheet1
Supplementary Table 4. The stepwise screening process of PCD hub genes for PRAN model construction, including 55 univariate cox genes, 15 LASSO genes, and 7 multivariate cox genes.
The 55 prognosis-related genes indentified by univariate analysis.						The 15 prognosis-related genes followed by LASSO regression analysis.			The 7 risk genes followed by multivariate Cox regression analysis.
Gene	Coefficient	Hazard_Ratio	CI	pvalue		Gene	coefficient		Gene	Coefficient	exp(coef)	se(coef)	z	Pr(>|z|)
CCL14	-0.325	0.723	0.528-0.989	0.042		CCL14	-0.13917		CCL14	-0.31934	0.726628	0.18854	-1.69376	0.0903118
LMOD3	-1.409	0.244	0.072-0.827	0.023		LMOD3	-1.06959		CPA3	-0.0597763	0.941975	0.0749323	-0.797738	0.425022
RAMP3	-0.245	0.783	0.631-0.972	0.026		ERGIC1	0.315795		CX3CR1	-0.215253	0.806338	0.125771	-1.71146	0.0869956
ERGIC1	0.463	1.589	1.221-2.067	0.001		KRT87P	0.104457		IKZF3	-0.234505	0.790962	0.125935	-1.8621	0.0625883
GOLM1	0.157	1.171	1.01-1.357	0.037		SLC16A4	0.00555084		KIF21B	0.471288	1.60206	0.122801	3.83781	0.000124138
KIF13B	0.188	1.207	1.013-1.436	0.035		CLECL1	-0.148222		LINC00528	-0.537697	0.584092	0.242182	-2.22022	0.0264038
KRT87P	0.241	1.272	1.055-1.535	0.012		CPA3	-0.0175748		SLC16A4	0.134984	1.14452	0.0568702	2.37355	0.0176179
MISP	0.13	1.139	1.008-1.287	0.037		CX3CR1	-0.0788713
MUC5B	0.07	1.073	1.007-1.143	0.029		CYP1B1	-0.0311528
PLEKHA6	0.138	1.148	1.021-1.291	0.021		IKZF3	-0.0415759
PPP1R15B-AS1	0.294	1.342	1.104-1.633	0.003		KIF21B	0.294968
SLC16A4	0.109	1.115	1.006-1.236	0.038		LINC00528	-0.25846
BTLA	-0.394	0.674	0.486-0.937	0.019		PLA2G4C	-0.0335737
CCR7	-0.18	0.835	0.702-0.994	0.042		RHOH	-0.0623462
CLEC10A	-0.192	0.825	0.7-0.973	0.022		TRBV10-2	-0.160561
CLECL1	-0.516	0.597	0.424-0.839	0.003
CPA3	-0.168	0.845	0.746-0.957	0.008
CX3CR1	-0.23	0.794	0.651-0.969	0.023
CYP1B1	-0.153	0.858	0.738-0.997	0.046
GZMK	-0.159	0.853	0.733-0.993	0.04
HLA-DOB	-0.208	0.813	0.666-0.991	0.041
ICAM3	-0.296	0.744	0.592-0.935	0.011
IFITM3P6	-0.328	0.72	0.521-0.994	0.046
IGFLR1	-0.319	0.727	0.536-0.985	0.04
IKZF3	-0.252	0.777	0.645-0.936	0.008
IL21-AS1	-1.237	0.29	0.087-0.964	0.043
KIF21B	0.236	1.266	1.027-1.561	0.027
LINC00528	-0.643	0.525	0.337-0.819	0.004
MAP4K1	-0.265	0.767	0.621-0.949	0.014
MS4A2	-0.318	0.728	0.569-0.931	0.011
NCR3	-0.254	0.776	0.607-0.992	0.043
P2RY8	-0.232	0.793	0.638-0.985	0.036
PLA2G4C	-0.316	0.729	0.56-0.949	0.019
PRKCB	-0.239	0.788	0.63-0.985	0.036
RHOH	-0.274	0.761	0.615-0.94	0.011
SEPTIN1	-0.256	0.774	0.617-0.971	0.027
SIT1	-0.211	0.81	0.677-0.968	0.021
SLAMF1	-0.262	0.77	0.612-0.968	0.025
SNAI3	-0.339	0.713	0.515-0.986	0.041
STK17B	-0.256	0.774	0.615-0.974	0.029
TESPA1	-0.31	0.734	0.548-0.983	0.038
TMC8	-0.22	0.803	0.649-0.993	0.043
TRAF3IP3	-0.279	0.757	0.592-0.967	0.026
TRAV10	-0.406	0.666	0.465-0.954	0.027
TRAV34	-0.5	0.607	0.379-0.97	0.037
TRAV8-5	-0.574	0.563	0.332-0.955	0.033
TRAV8-6	-0.255	0.775	0.607-0.988	0.04
TRBV10-2	-0.478	0.62	0.424-0.905	0.013
TRBV14	-0.348	0.706	0.524-0.951	0.022
TRBV18	-0.227	0.797	0.646-0.984	0.035
TRBV19	-0.227	0.797	0.651-0.976	0.028
TRBV20-1	-0.182	0.833	0.704-0.987	0.034
TRBV28	-0.151	0.86	0.742-0.995	0.043
TRBV4-1	-0.238	0.788	0.628-0.989	0.039
ZBP1	-0.221	0.801	0.643-0.999	0.049
