# Supplementary material for: Revealing prognostic insights of programmed cell death (PCD)-associated genes in advanced non-small cell lung cancer
Source: Aging (Albany NY). 2024 May 8;16(9):8110–41. doi: 10.18632/aging.205807 (PMC11131998; doi:10.18632/aging.205807)
Supplement: Supplementary Table 5 [file aging-16-205807-s006.xlsx]

## Sheet: Sheet1
Supplementary Table 5. Drug sensitivity prediction based on TCGA-Advanced NSCLC patients.
	CIL55	BRD4132	BRD6340	BRD9876	betulinic acid	gossypol	chlorambucil	fluorouracil	cimetidine	azacitidine	trifluoperazine	paclitaxel	tamoxifen	carboplatin	teniposide	sildenafil	simvastatin	parbendazole	procarbazine	curcumin	ciclopirox	epigallocatechin-3-monogallate	myricetin	methotrexate	lovastatin	valdecoxib	dacarbazine	prochlorperazine	ifosfamide	doxorubicin	ouabain	BRD9647	piperlongumine	pyrazolanthrone	C6-ceramide	topotecan	importazole	etoposide	PRIMA-1	tanespimycin	blebbistatin	cytochalasin B	NSC95397	manumycin A	mitomycin	tacrolimus	SB-431542	staurosporine	SB-225002
testTCGA-66-2767-01A	15.0497	13.1544	14.2866	13.5519	15.0979	12.8532	12.5324	13.1708	14.1708	14.8041	14.1918	5.56384	13.9401	14.6393	11.9299	14.4205	14.5371	8.5611	15.3713	11.3946	11.7672	13.2046	15.3517	8.58042	12.099	12.8588	13.872	13.2631	15.205	6.82038	4.428	14.1197	12.4734	13.7556	14.7567	7.40736	12.7604	11.4845	12.3542	10.2308	15.4917	13.3397	13.3824	12.9478	10.5808	14.1786	14.6269	13.997	12.1726
testTCGA-77-A5FZ-01A	15.2162	13.3294	14.1557	13.5243	15.146	12.7867	10.986	13.1391	14.1825	14.9033	14.106	3.24946	13.7066	14.2331	8.51009	14.2977	13.6743	6.68009	15.4424	10.8571	10.7383	12.4557	15.479	8.78865	11.9709	11.9046	13.3568	13.0483	15.4342	5.18595	3.26381	13.8386	11.3714	13.5475	14.8368	5.3431	11.7131	9.19642	11.0235	9.46254	14.9829	12.9174	12.5934	11.8394	9.14289	14.1724	14.7319	12.8428	11.6451
testTCGA-NC-A5HG-01A	14.2101	13.1781	14.2533	13.8655	15.0739	12.889	13.8334	12.744	15.4682	14.869	14.1005	6.23728	14.1247	14.7722	10.0304	14.544	13.1837	8.72197	15.2487	11.3238	12.0053	13.3529	15.0932	6.8472	12.2064	13.0309	14.0314	13.4105	14.9891	7.27176	4.7769	14.4853	12.5955	13.6621	14.5655	8.3897	13.1063	12.8466	12.6222	9.65191	14.5829	13.3535	13.8411	13.3717	10.658	14.431	14.6524	14.8531	11.9182
testTCGA-55-7816-01A	14.1379	12.8569	14.2781	14.2398	15.0176	12.6294	12.7793	13.5513	14.7355	14.4628	14.0121	10.1177	14.066	14.4209	10.8381	14.171	13.6287	9.95343	15.3608	11.9059	10.9348	11.8026	15.5684	9.2097	11.9542	13.3709	13.1914	12.7111	14.9201	6.80627	4.05096	14.2452	11.6693	13.5355	14.576	10.3393	12.2803	11.6471	10.1067	11.467	14.6425	12.4894	13.3465	12.5258	9.77157	13.2722	14.7012	14.1689	13.5549
testTCGA-86-A4P8-01A	14.2636	13.309	13.6838	15.6385	15.1088	12.2303	13.0608	12.6385	14.2449	15.4032	14.5453	18.1142	14.0676	14.5219	11.6681	14.6679	12.9947	16.8174	15.2213	12.7896	15.1209	13.4669	15.8024	20.2276	12.4445	13.1742	13.428	12.9746	15.0794	9.13249	9.17275	13.7766	13.524	14.1674	14.6458	12.1489	13.9428	14.3128	7.8393	16.5448	14.2574	15.5373	13.2627	13.4837	12.599	14.0735	14.9613	14.0117	14.9308
testTCGA-34-8454-01A	14.7573	13.0468	14.2739	13.5925	15.0993	12.7285	12.7326	13.1052	15.0859	14.7706	14.156	4.25045	14.0333	14.5392	8.84378	14.4378	13.5157	8.5106	15.3535	11.4051	11.5924	13.2514	15.2205	7.91018	12.0502	12.6328	13.8286	13.4538	15.3229	6.72204	5.07433	14.2036	12.503	13.7387	14.6235	7.51709	12.7902	11.739	12.3981	9.79098	14.6208	13.0362	13.5482	13.6454	10.0732	14.0524	14.4528	13.1781	12.1488
testTCGA-62-8399-01A	14.1365	13.1096	14.3189	14.0261	15.1404	12.8785	13.7258	13.9576	14.9802	14.948	14.0497	6.60479	14.2257	14.5726	10.6502	14.348	13.4798	9.91132	15.3775	11.9218	12.035	13.3761	15.3837	10.0288	12.2346	12.669	14.1881	13.1731	15.0267	8.13136	4.91235	14.2227	12.5896	14.1133	14.6006	9.37205	13.234	12.7216	12.2236	11.8926	14.8221	12.9724	13.3273	13.2776	11.4575	14.2138	14.6049	14.3404	12.4865
testTCGA-95-A4VK-01A	14.2201	13.2352	14.2508	14.0084	15.1032	12.7412	13.9183	13.1676	15.1142	14.4605	14.0323	9.07284	13.7829	14.6429	10.8386	14.2129	13.5969	11.1445	15.1998	12.1514	12.253	13.0281	14.9053	10.7954	12.444	12.8568	14.0982	13.208	14.7445	8.64769	5.3978	14.4646	12.3782	13.8458	14.5075	9.96122	13.0109	12.8945	12.7297	10.5829	14.6977	13.1941	13.7008	13.7431	11.5014	14.2669	14.618	14.7264	13.3368
testTCGA-66-2742-01A	14.6022	13.1577	14.3011	13.8199	15.0991	13.1318	13.7948	13.3068	14.581	14.6808	14.2425	6.26761	14.2661	14.6603	11.6403	14.5258	14.0975	9.62505	15.3241	11.7011	11.9668	13.8027	15.1508	7.87404	12.1379	13.2286	14.2459	13.5449	14.9627	7.62387	5.72422	14.6415	13.0461	14.0189	14.616	8.26822	13.1886	12.0935	13.4644	10.3972	15.1568	13.4203	14.031	13.9103	10.636	14.3415	14.5509	14.3447	12.3855
testTCGA-77-6844-01A	14.2031	13.1158	14.2221	13.6423	15.0881	12.7956	13.3376	12.8292	15.2007	14.7817	14.1648	4.7053	14.0165	14.6013	9.47643	14.4091	13.3876	8.44652	15.2748	11.3014	11.8146	13.4342	15.0989	6.23446	12.2762	13.0863	14.1081	13.2837	15.0058	6.69776	4.90912	14.4867	12.7093	13.9181	14.569	7.95676	13.4238	12.2451	13.3679	9.73925	14.6322	13.2066	13.7319	13.4037	10.4442	14.1177	14.4059	14.7569	12.1585
testTCGA-95-A4VP-01A	14.6302	12.9759	14.2625	14.0976	15.0982	12.974	13.4613	13.3282	15.1939	14.504	14.2688	9.32309	14.1571	14.717	10.7187	14.4015	13.3341	10.9759	15.2234	12.1121	12.3796	13.7244	15.0755	9.5937	12.2428	12.9877	14.2655	13.5231	14.9594	8.25683	5.00051	14.3297	12.9039	13.9247	14.8127	9.53319	13.4497	13.267	12.7104	11.4656	14.6024	13.5279	13.8402	13.6673	11.7269	14.3407	14.6308	14.3749	13.2586
testTCGA-98-8023-01A	15.5525	12.9708	14.2253	13.5865	15.0843	12.7292	12.3474	13.1982	14.822	14.6438	14.0281	3.97388	13.8873	14.4604	11.5792	14.3143	13.923	7.36713	15.3433	11.2151	11.1864	13.0936	15.2936	7.49902	12.0473	12.7897	13.6402	13.3573	14.9185	6.16212	4.02804	13.9397	12.3167	13.4991	14.7291	6.60662	12.9403	11.1359	11.7616	9.71511	15.5585	12.6994	13.1204	12.9728	9.45597	13.9636	14.5664	14.0401	11.5736
testTCGA-69-7974-01A	14.2727	13.2772	14.2359	14.3756	15.0855	12.9563	13.3659	12.665	14.9411	14.436	14.0544	8.31945	14.4198	14.6653	10.208	14.3516	12.6816	11.04	15.3234	12.0027	13.0304	13.2844	15.6178	10.5063	12.0769	13.2231	13.9601	13.1624	14.8279	8.26236	6.85974	14.3189	12.6685	13.8865	14.5831	9.44174	13.5273	12.5406	11.6289	11.7053	14.6164	12.8111	13.7853	13.4597	11.0464	14.3542	14.5105	14.4394	13.246
testTCGA-55-7227-01A	14.2545	13.2571	14.3366	14.2914	15.1087	13.2512	12.9743	12.9315	15.2528	14.3495	14.0965	7.25837	14.0633	14.5645	9.21112	14.2947	12.829	9.84946	15.2571	11.734	12.17	13.0365	15.0947	9.43051	12.0937	13.1217	14.0744	13.2831	14.932	7.62991	5.6556	14.481	12.3076	13.7061	14.7078	8.7792	12.9139	12.4395	12.0275	10.8369	14.4282	12.7341	13.6415	13.3525	11.0602	14.3758	14.5734	14.4644	12.8513
testTCGA-05-5420-01A	15.229	12.6955	14.2108	12.6575	15.1162	12.9515	13.0339	13.5371	15.1259	14.6013	14.0025	4.6913	13.9714	14.6504	7.46252	14.3443	14.6545	8.75541	15.4162	11.6983	11.2702	13.6142	15.3026	6.84968	12.0776	12.6576	13.7209	13.3717	15.9542	7.63693	3.99095	14.2099	12.469	13.5216	14.7859	7.71813	12.6303	11.5759	12.4532	9.73536	15.0851	13.4871	13.1802	12.9785	10.94	14.0748	14.6839	12.3627	11.9942
testTCGA-62-A46Y-01A	14.22	13.0603	14.3361	14.139	15.0822	12.8708	13.4443	13.0504	15.1686	14.3584	14.2253	7.9529	14.1764	14.6766	10.3064	14.3762	12.9597	10.5581	15.2844	12.0279	12.6569	13.3666	15.3714	8.26223	12.1659	13.2686	14.1162	13.3743	14.7007	7.91363	5.94362	14.3275	12.6735	13.9069	14.5794	8.91885	13.1169	12.8425	12.6411	11.1684	14.6424	13.1827	13.6617	13.3651	11.3792	14.3482	14.6576	14.7451	13.2034
testTCGA-66-2794-01A	14.7545	13.1618	14.2782	13.4163	15.0858	12.647	12.6419	12.4048	14.9623	14.8119	14.1118	4.61439	14.2223	14.725	10.2415	14.5225	13.663	7.42031	15.3107	11.4082	11.7884	13.1491	15.2324	6.51051	12.0654	12.795	13.7286	13.2843	15.2813	6.99898	4.70665	14.4713	12.7062	13.8044	14.693	7.40299	12.6448	11.6242	12.7132	9.69308	14.9185	13.1653	13.4427	13.3922	9.54477	13.9562	14.4391	14.5765	11.8173
testTCGA-66-2800-01A	14.3599	13.1643	14.3277	13.7966	15.0771	12.8935	13.8116	13.5753	14.7982	14.8586	14.1962	6.68343	14.2767	14.8741	10.6494	14.5877	13.4331	9.50053	15.2677	11.7437	12.6134	13.5483	15.1953	7.86945	12.0845	13.1834	14.2759	13.2983	14.977	7.86416	5.22912	14.3332	13.3033	14.026	14.6554	9.18902	13.3484	12.3617	13.1558	10.8071	14.6422	13.3666	13.6095	13.7228	11.1804	14.257	14.7043	14.4205	12.4464
testTCGA-66-2791-01A	14.9165	13.0349	14.3425	13.2542	15.0953	13.0777	13.3076	13.3655	14.6465	14.5757	14.1853	5.18367	14.0836	14.668	11.5477	14.4589	14.4906	8.57477	15.3876	11.7678	11.808	13.6027	15.2717	8.19689	12.0557	12.9171	14.1544	13.4382	15.2364	7.6332	5.11558	14.1853	12.8266	13.9868	14.6845	8.2394	12.7049	11.8574	12.9469	10.2775	15.302	13.0208	13.5304	13.3839	10.3679	14.0619	14.6014	13.8698	12.1368
testTCGA-34-5239-01A	15.3095	13.0722	14.2444	13.7248	15.1449	12.8066	12.4176	13.1324	8.86751	14.7411	14.0762	4.14029	14.0211	14.3786	13.7401	14.3383	15.3549	7.22013	15.3721	11.1523	11.2329	12.9884	15.1586	7.81512	12.0523	12.3687	13.5359	13.0254	15.231	5.85761	4.17081	14.2137	11.9373	13.6617	14.7355	7.27917	12.6006	11.0761	11.8063	9.56122	20.3363	12.8154	12.8903	12.9909	9.49811	14.021	14.4406	8.23421	11.6682
testTCGA-37-A5EN-01A	14.0338	13.0077	14.2857	13.6046	15.0598	13.0543	13.1808	12.6117	15.0744	14.6523	14.1	5.79694	14.0846	14.6401	8.49128	14.3978	13.6585	8.13283	15.2859	11.5551	11.8506	13.5746	14.9332	6.51824	12.3387	13.0722	14.1009	13.2362	15.1217	6.8092	4.59223	14.3562	12.6169	13.8433	14.6062	8.20872	13.3921	11.929	12.5394	9.8939	14.6777	12.8504	13.5668	13.4681	10.2984	14.1125	14.7151	14.6441	12.2412
testTCGA-55-1594-01A	14.1006	12.929	14.3059	13.3762	15.1757	12.6861	13.9154	14.3561	15.0357	14.664	14.1119	7.2294	14.0238	14.7613	10.5759	14.2592	13.6452	9.57596	15.302	11.7969	11.4941	13.4421	14.9981	10.107	12.3167	13.0238	14.4016	13.1681	14.9174	8.91167	4.8147	14.4614	12.56	14.108	14.5979	8.63715	13.1258	12.5633	12.2231	11.1318	14.6502	13.3637	13.2717	13.1716	10.8341	14.2967	14.4352	13.8308	12.3989
testTCGA-93-A4JN-01A	14.3951	13.0571	14.2746	14.0581	15.1412	12.7342	12.7663	13.9	15.0208	14.8339	14.0585	6.71304	13.6142	14.5006	11.0286	14.1809	13.5767	9.87343	15.3108	11.5087	11.7029	12.464	15.0703	8.07208	12.2535	12.6431	13.866	12.9999	14.9639	6.78432	4.55026	14.1222	11.4841	13.8595	14.5501	7.65322	12.3437	11.682	11.7734	9.68994	15.125	12.8649	13.0595	12.5358	10.833	14.1844	14.6956	12.8648	12.6338
testTCGA-68-A59I-01A	14.7209	12.9556	14.2699	13.5567	15.095	12.8106	12.6574	14.0085	14.6625	15.0249	14.1477	5.46197	13.7518	14.5016	9.558	14.364	13.5107	9.55805	15.3268	11.4426	11.8981	13.5293	15.3599	9.64225	12.1904	12.4121	14.3767	13.2779	15.3002	7.14937	4.11215	14.1347	12.26	13.8362	14.6925	8.04431	12.6017	12.0623	12.3198	10.2864	14.7374	13.0914	13.5987	12.8793	10.5691	14.3056	14.5878	12.6538	12.1642
testTCGA-77-8148-01A	14.3112	12.8619	14.2823	13.4875	15.0697	12.6504	12.3583	12.9601	15.0315	14.8912	14.1837	4.99877	13.9998	14.6603	8.41006	14.3297	12.9446	7.82226	15.278	11.271	11.6336	13.5106	15.28	5.92531	12.1521	12.6518	13.9082	13.2411	15.0741	6.83587	4.39706	14.192	12.3875	13.8236	14.5752	7.76352	12.947	11.8371	12.5479	10.268	14.5066	12.7927	12.9504	12.7494	10.0033	13.9934	14.4636	14.4664	11.9364
testTCGA-86-7701-01A	15.3862	12.8005	14.2584	13.345	15.1592	12.8123	12.5525	13.7931	13.9522	14.7277	13.9819	4.9915	13.7937	14.408	4.93802	14.3023	13.2128	8.59633	15.4362	11.4267	10.9176	13.2599	15.2245	11.4274	12.2186	12.1176	14.0308	13.2196	16.0052	6.89263	4.65323	14.1864	12.0029	13.8266	14.697	6.89965	12.0744	10.947	11.6932	10.1869	14.3961	12.939	13.1412	12.7672	9.81457	14.2449	14.4168	10.4094	12.161
testTCGA-49-6745-01A	14.2681	13.7382	14.3067	14.3803	15.0693	13.1998	13.6046	13.1888	15.2476	14.7623	14.1947	9.2361	14.2533	14.6774	10.0345	14.3842	12.6326	11.3089	15.2487	12.1521	12.8538	13.5264	15.1991	10.9577	11.965	13.6449	13.9465	13.3727	15.0831	8.74621	7.47045	14.4505	13.0033	13.8741	14.5797	9.54181	13.1443	12.7169	11.8501	11.8458	14.243	12.6481	14.1001	13.9367	11.6153	14.2533	14.519	14.6384	13.2003
testTCGA-MP-A4TC-01A	14.5934	13.3376	14.4626	14.1951	15.1061	13.2087	13.5376	13.6253	14.9202	14.5397	14.1272	7.80851	14.156	14.7159	10.9916	14.2845	13.4447	10.6072	15.2985	11.9276	12.3069	13.4136	15.3123	9.30514	11.9983	13.1923	14.2874	13.3932	14.7541	8.021	6.52206	14.3534	12.6521	13.9167	14.6583	9.18663	13.2012	12.6157	12.6483	10.4866	15.0927	12.7441	13.5081	13.3671	11.6166	14.2701	14.599	14.0719	12.905
testTCGA-44-3396-01A	16.2658	13.1983	14.3158	13.4057	15.1209	13.1567	12.7816	13.5722	13.5679	14.6262	14.0764	5.04592	13.9295	14.5243	7.26588	14.2898	13.1398	8.5131	15.34	11.2747	11.4811	13.3881	15.5367	8.29039	12.0247	12.7953	13.9085	13.4235	16.2441	7.14177	4.45224	14.0691	12.1886	13.7275	14.7239	7.31318	12.4987	11.7643	11.8351	9.9531	15.1725	12.9674	13.3576	12.9214	10.6132	14.2299	14.5878	8.95854	12.0012
testTCGA-78-7149-01A	14.4744	13.0673	14.3724	13.753	15.0769	13.2102	14.1467	13.0974	15.2422	14.3765	14.1779	8.28691	14.1372	14.7892	11.2484	14.4289	13.8211	10.328	15.1891	12.4986	12.224	13.8206	14.9346	7.75041	12.2363	13.2109	14.2413	13.5624	14.7478	8.43064	4.59501	14.5391	13.2207	13.9227	14.7425	9.4222	13.3273	13.397	13.5574	11.1836	14.7601	13.3161	14.1176	14.1576	11.5486	14.4544	14.7166	14.9455	13.1059
testTCGA-64-1679-01A	14.0544	13.5696	14.3544	14.2342	15.0835	13.1461	13.9414	14.3742	15.3364	14.8508	14.1243	7.85789	14.0445	14.7778	10.5309	14.2438	12.973	10.9446	15.2907	12.0641	12.6308	13.7223	15.3136	11.1905	11.9652	13.5514	14.4153	13.3572	15.1905	8.74248	6.48801	14.5505	12.8774	14.1261	14.6264	10.1226	13.2419	13.1435	12.8086	11.6631	14.3897	12.6626	13.7053	13.6898	12.4121	14.3387	14.394	14.2667	13.099
testTCGA-77-A5G1-01A	14.3987	13.5108	14.3205	14.3572	15.0497	13.3504	13.8168	13.8354	15.4541	15.1246	14.2959	7.28964	14.1444	14.867	11.2343	14.4552	13.0196	10.2247	15.1692	11.7691	12.6057	13.79	15.0918	10.9216	11.9275	13.5069	14.3725	13.4698	15.0264	8.51869	6.17927	14.4199	13.0276	13.901	14.6943	10.0662	13.3964	13.3903	13.2596	10.4694	14.4198	13.081	14.1767	13.5844	12.1824	14.4673	14.4348	14.5367	12.7024
testTCGA-18-3414-01A	14.2376	13.3863	14.3818	13.7001	15.0961	12.9899	13.8046	12.9563	15.3132	14.7493	14.2088	5.75063	14.1682	14.8075	10.104	14.5179	13.628	8.55278	15.2441	11.4067	12.1339	13.459	14.9528	7.09856	12.1989	13.3081	14.1653	13.3605	14.9583	7.17486	5.24136	14.6978	13.0283	13.7534	14.5588	8.69513	13.2035	12.6253	13.4966	9.97884	14.6399	13.169	13.7546	13.8389	10.8666	14.0846	14.6682	14.7411	12.4636
testTCGA-66-2769-01A	14.9671	13.1414	14.3104	14.0432	15.1029	12.9637	13.2997	14.0675	14.3487	14.911	14.1718	6.40425	14.1723	14.777	10.9279	14.432	13.9169	9.29165	15.2697	11.5407	12.2618	13.4563	15.1522	8.03012	11.9126	12.7518	14.0719	13.3133	14.9266	7.4212	4.59819	14.3186	12.7941	13.7677	14.7689	8.42584	12.9189	12.4451	13.053	10.1476	14.7117	13.522	13.8362	13.2728	11.0575	14.3441	14.5956	13.2923	12.2727
testTCGA-22-4601-01A	14.2452	13.0526	14.3991	13.5714	15.0969	13.1261	13.9548	13.476	14.7523	14.791	14.2035	6.52637	14.1176	14.6931	9.85676	14.5059	13.6198	9.31089	15.3032	11.915	12.0546	13.8371	15.2398	7.43158	12.3134	13.1821	14.5783	13.4108	14.8966	8.53259	4.72632	14.3671	12.9661	14.2761	14.5825	9.25673	13.5174	12.7752	13.5658	11.2775	14.5066	13.1362	13.902	13.9045	11.5673	14.3477	14.4869	14.4271	12.1555
testTCGA-49-AAR4-01A	15.4211	13.135	14.2423	13.5723	15.1168	12.9524	12.37	13.6972	14.0659	14.6396	14.282	5.37083	13.7111	14.5325	11.5699	14.2872	14.1901	8.9863	15.2975	11.4167	11.5198	13.125	15.3945	8.62705	12.1618	12.6891	13.9731	13.4398	15.2175	6.57613	4.72814	13.9756	11.9697	13.6694	14.7068	7.20953	12.6402	11.626	11.6418	9.6877	15.5987	13.0716	13.2865	12.6758	10.5895	14.2291	14.5035	12.9104	12.3581
testTCGA-39-5030-01A	16.6853	13.0133	14.0999	12.8943	15.1413	12.8698	12.0141	14.4299	13.8014	14.9239	14.1776	2.59916	13.8629	14.4578	9.77085	14.2767	15.5494	7.26986	15.4604	11.1858	10.7931	13.1594	15.4106	8.66842	11.9885	12.2808	13.7666	13.6497	15.9712	5.8526	3.6018	13.8401	11.7963	13.6804	14.7888	6.34673	12.0508	10.5401	11.1545	10.1014	15.9051	12.8472	13.0365	12.4371	9.67708	14.3218	14.504	10.6181	11.0676
testTCGA-99-7458-01A	14.0694	13.0957	14.1788	13.9828	15.1078	12.9248	12.8697	13.3236	14.9681	14.4247	14.0332	8.05594	13.965	14.4927	9.95871	14.3025	12.7955	10.6214	15.3453	11.9417	12.4654	13.0985	15.2352	10.9639	12.1644	13.0873	13.9417	13.0816	14.9032	7.78215	7.14025	14.3428	12.338	13.8803	14.5702	9.32795	12.7275	12.3083	11.7171	11.718	14.4483	12.8198	13.6731	13.3064	10.9523	14.1134	14.4591	14.3622	13.0706
testTCGA-05-4434-01A	14.5154	13.342	14.356	14.0013	15.0879	12.9554	13.2685	13.2651	15.2967	14.5811	14.1817	7.82389	14.0928	14.6953	11.1254	14.3816	13.697	10.0075	15.2715	12.0339	12.0513	13.3412	15.3431	9.53297	12.0783	13.3604	13.9834	13.4692	14.9074	8.0778	5.85465	14.3188	12.8042	13.9009	14.661	8.91376	13.2346	12.5563	12.652	10.7624	14.8049	13.5383	13.5449	13.4658	11.3799	14.2903	14.6274	14.6457	12.6783
testTCGA-93-A4JP-01A	14.229	13.3084	14.1198	14.9226	15.1326	12.51	14.2425	13.4849	14.7448	14.9332	14.3516	14.982	14.1054	14.703	11.8443	14.5384	13.2785	14.7573	15.3416	12.651	13.8399	13.5555	15.4082	15.6103	12.4684	13.2875	14.0396	13.2938	15.0163	9.46197	8.02493	14.1477	13.2759	14.3239	14.5309	11.5809	13.6494	14.0564	10.0001	14.5632	14.3326	14.6732	13.5171	13.4876	12.7035	14.2431	14.7371	14.5055	14.2803
testTCGA-05-4425-01A	14.341	13.2892	14.3192	14.2668	15.0945	12.8974	13.783	13.4095	15.5226	14.4567	13.9417	9.95901	14.2756	14.8755	10.1033	14.3219	13.2583	11.6642	15.2992	12.0945	12.2644	13.1769	15.1401	10.9088	12.1225	13.3053	14.0127	13.3232	14.335	8.61424	6.45794	14.5758	12.5405	13.9696	14.6209	9.27582	12.8652	12.8588	11.791	11.1901	14.5258	13.354	13.5311	13.3034	11.7411	14.2384	14.5227	14.4714	13.3296
testTCGA-77-7335-01A	14.6029	13.2435	14.3984	13.6609	15.1144	13.2246	13.5007	13.3153	14.923	14.5448	14.1745	6.22825	14.1119	14.7878	10.1387	14.4959	13.3443	9.12444	15.3351	11.8639	11.812	13.6381	15.2033	9.49146	11.9506	13.3411	14.2149	13.5645	15.1869	7.98948	5.13522	14.4491	13.0601	13.9645	14.8222	9.2018	12.9604	12.4465	13.1108	10.4777	14.5107	13.0999	13.7015	13.5503	11.5432	14.2547	14.526	14.2449	12.6261
testTCGA-99-8025-01A	14.3957	13.1575	14.4805	14.0945	15.1098	13.3651	13.9363	13.7053	15.618	14.4795	14.1746	8.82316	14.2199	14.8586	9.51353	14.3242	13.1766	11.0923	15.3069	12.1948	12.5216	13.7658	15.1726	10.0048	12.2415	13.0441	14.5275	13.6656	14.9719	8.84173	6.21238	14.4181	12.9222	14.0541	14.646	9.70499	13.3147	13.2692	12.6705	10.9957	14.7672	13.1354	13.8725	13.8544	11.9427	14.3237	14.5687	14.7236	13.1686
testTCGA-21-1070-01A	14.472	13.0852	14.3068	13.588	15.1091	12.9506	13.2886	13.0347	12.3223	14.6559	14.1572	4.86131	14.1303	14.6587	9.03814	14.4587	13.5405	8.64289	15.3981	11.4922	11.4225	13.476	15.0924	7.34008	12.0842	13.0724	13.9583	13.4312	15.4472	6.74605	5.22263	14.2653	12.4854	13.7061	14.7303	7.6133	13.115	11.7386	12.9621	9.50902	15.9597	13.3116	13.7797	13.0541	10.6458	14.3812	14.5257	11.1402	12.2388
testTCGA-44-5643-01A	14.3199	13.1977	14.4098	13.6289	15.0821	12.9766	13.3574	12.5231	15.3771	14.83	14.0972	4.67913	14.3299	14.7037	8.41378	14.4855	13.6055	8.17319	15.3515	11.8501	11.8507	13.368	15.1119	6.92753	12.1565	13.2762	14.2027	13.3821	15.3596	7.27043	4.93753	14.4147	12.9511	14.1588	14.732	7.80369	13.3363	11.7993	12.7463	10.6432	14.7458	12.7892	13.7274	13.6507	10.5381	14.0539	14.4511	14.77	12.0807
testTCGA-22-5492-01A	15.303	13.1236	14.2103	13.37	15.1355	12.2882	13.4814	13.6873	14.6911	15.3945	14.8489	3.94092	13.8804	14.3753	12.8986	14.4833	13.7391	8.56061	15.4933	11.364	11.4623	14.0178	14.8476	11.7569	12.1556	12.6915	13.6567	12.9849	15.8868	7.12696	4.17241	13.9969	12.049	13.3223	14.6858	7.31504	11.9854	11.7986	12.47	9.90997	14.7769	12.6897	13.1988	12.8071	9.85954	14.2117	14.8119	12.3623	11.6108
testTCGA-86-8056-01A	13.7534	13.5846	14.3686	14.4026	15.1451	13.3227	14.4321	13.4727	15.0027	14.3887	14.0674	10.4478	14.2695	14.5164	10.2917	14.2355	13.3594	11.4272	15.3617	12.3598	12.7015	12.8918	15.0289	12.4201	12.4467	13.4185	14.1289	13.0966	14.978	9.26311	6.55672	14.6196	12.4318	14.2719	14.4452	10.3395	13.3269	13.0684	10.4856	12.4749	14.4238	13.2268	13.508	13.9492	11.6688	14.3251	14.5223	14.4172	13.3119
testTCGA-50-5941-01A	14.9284	13.3391	14.2826	13.4352	15.1163	12.7931	12.7926	13.2504	14.4998	14.6587	13.9749	5.88287	13.9358	14.5193	9.88704	14.3578	13.425	9.31493	15.3611	11.5779	11.5881	13.2909	15.4514	9.34678	12.0308	12.9895	13.6446	13.2854	15.2865	7.69045	5.83131	14.1774	12.4389	13.9689	14.6337	7.5536	12.6063	11.9459	12.3391	11.163	14.557	13.2122	13.4019	12.9699	10.5713	14.1943	14.3448	13.5305	12.4456
testTCGA-44-6774-01A	14.4772	13.1389	14.3933	14.3254	15.1468	13.285	13.5391	14.12	14.9796	14.6702	13.9688	8.06544	14.0417	14.7211	9.34785	14.2733	13.4484	10.3001	15.3232	11.9843	12.0421	13.5931	15.2309	10.6115	11.958	13.3525	14.3861	13.3322	15.2234	7.91959	4.82566	14.3604	12.8712	13.9906	14.7904	9.41931	13.0851	12.7272	12.3048	11.3533	14.8795	12.5729	13.7273	13.6834	11.7945	14.3216	14.5756	14.0019	13.0124
testTCGA-78-7158-01A	13.8507	13.0502	14.2047	13.8087	15.0994	12.9338	13.4648	12.5184	15.0844	14.3888	14.0035	7.2237	14.2261	14.379	8.29411	14.3693	13.3991	9.32214	15.3006	11.9634	11.9271	13.0562	14.8902	7.55057	12.321	12.9028	13.6138	13.1808	14.7075	6.94402	4.98218	14.5208	12.1998	13.7563	14.553	8.37683	13.0558	12.3586	11.8771	10.6987	14.5736	12.5867	13.5614	13.5623	10.2033	14.0815	14.7737	14.595	12.4634
testTCGA-05-4402-01A	15.7669	13.0178	14.0386	13.0855	15.1079	12.405	13.0899	13.9639	14.2569	15.2902	14.1671	5.15812	13.8074	14.7651	9.08515	14.4381	13.1608	8.94271	15.309	12.0919	11.9089	13.3739	16.1998	7.25311	12.0904	13.071	14.3388	13.615	15.1613	7.21344	4.72864	13.9247	12.2925	13.8637	14.6713	6.50178	12.4601	12.009	13.2004	10.9393	13.2029	11.9593	13.8243	13.0016	10.8501	14.1329	14.5886	13.2964	11.3254
testTCGA-86-7714-01A	13.9432	13.2683	14.3603	14.3973	15.1192	13.1372	13.8494	13.1663	15.2502	14.3399	14.1787	9.05829	14.2029	14.5301	9.90885	14.3409	13.1943	11.1463	15.2978	12.1912	12.6726	13.4672	14.892	9.84761	12.2642	13.2565	14.1295	13.4965	14.6835	8.41626	6.21149	14.6712	12.7087	13.89	14.6214	9.75021	13.2686	13.059	12.1969	11.6798	14.4838	12.8162	13.8785	14.0275	11.6262	14.4005	14.5024	14.8369	13.3632
testTCGA-05-4398-01A	14.9193	13.51	14.3745	14.1063	15.0824	13.1806	13.3236	13.7835	15.0958	14.7203	14.1963	7.15461	14.0793	14.7269	10.803	14.3167	13.8311	10.0837	15.3727	11.6554	12.5382	13.0775	15.5541	10.2738	12.0982	12.6103	14.002	13.3177	15.2883	7.59819	6.19971	14.1907	12.3406	13.8699	14.5808	8.22806	12.5824	11.9177	11.5731	10.7971	14.664	12.9748	13.479	13.2867	11.2827	14.304	14.6382	13.6661	12.5978
testTCGA-NC-A5HT-01A	14.0241	12.7735	14.1883	13.9492	15.1014	12.6131	13.4244	13.4565	15.2256	14.8071	14.1762	6.60123	14.1222	14.7011	10.6976	14.4985	13.1266	9.59932	15.29	11.1973	12.1282	12.9109	15.2398	7.71463	12.324	13.1043	14.2834	13.2689	15.002	7.23224	4.67308	14.2352	12.5884	13.8347	14.578	8.65481	13.6031	13.0806	13.3924	10.3905	14.8004	13.4489	13.6623	13.1869	10.8736	14.3855	14.6723	14.6295	12.2212
testTCGA-56-7579-01A	14.0356	12.9009	14.3502	13.6919	15.0395	12.9634	14.5035	12.565	15.2953	14.6957	14.0743	6.00988	14.1731	14.9188	11.302	14.4761	13.2467	9.33454	15.3201	11.66	12.1943	13.9659	15.152	7.62413	12.1539	13.2664	14.2489	13.4821	15.2624	8.1244	5.48657	14.3771	13.4124	13.832	14.6361	9.47544	13.0585	13.1207	14.0059	9.34699	14.4548	13.2659	14.4151	14.0232	11.3647	14.2457	14.4745	14.9507	12.2283
testTCGA-55-7727-01A	13.9715	12.9939	14.2288	13.8761	15.1515	12.8658	13.8446	13.6276	15.3131	14.3744	14.1764	8.19356	14.1285	14.5182	9.81698	14.4361	13.2811	11.1382	15.3989	12.19	12.3448	13.3841	15.0413	9.43572	12.284	13.1792	14.2538	13.4847	14.8648	8.33166	6.15069	14.5855	12.736	13.9711	14.548	9.57356	13.2716	12.434	12.6445	11.6961	14.5776	13.1739	13.9354	13.8321	11.1433	14.3272	14.5755	14.9224	13.0777
testTCGA-33-4538-01A	14.6624	13.0147	14.3459	13.6144	15.0844	13.0897	13.5779	12.9111	15.2411	14.6546	14.2319	5.22085	14.2945	14.707	10.8471	14.5137	14.0919	8.1643	15.2869	11.6748	11.9786	13.648	15.0455	5.8414	12.1456	13.3314	14.3038	13.4627	14.9325	7.15279	5.4823	14.4389	13.1858	13.9247	14.6275	8.19879	13.4032	11.9096	13.7346	10.1831	15.0249	13.1684	13.9512	14.1792	10.0417	14.2578	14.5412	15.0917	12.0557
testTCGA-37-4133-01A	14.5389	13.1923	14.3078	13.4349	15.0948	13.3487	14.3506	13.4191	15.7256	14.5581	14.4208	6.94183	14.3253	15.0372	9.71763	14.6942	13.6648	9.70836	15.2709	12.1665	12.3124	14.156	15.007	6.42437	12.1152	13.3844	14.3706	13.518	14.9456	8.48887	5.23979	14.6975	13.5331	14.0129	14.6505	9.20739	13.3516	12.7379	14.4016	10.3172	14.7795	13.3907	14.1796	14.123	11.0685	14.3131	14.7268	13.9018	12.6513
testTCGA-56-8625-01A	14.8315	13.1694	14.3464	13.5937	15.1595	12.674	12.3158	13.0012	14.572	14.7575	14.016	3.68969	13.8645	14.3652	8.41826	14.3136	13.1473	7.51431	15.4507	11.2663	11.0663	13.1268	15.5551	9.35544	12.1275	12.0245	13.66	13.1669	15.332	6.53618	4.54588	14.16	11.672	13.9555	14.6257	6.96026	12.2759	10.7646	11.2755	9.67399	14.3409	12.9176	12.5513	12.4444	9.76741	14.1121	14.3384	12.7443	11.6371
testTCGA-NC-A5HQ-01A	14.327	13.0083	14.2246	13.9183	15.0579	12.9404	13.7119	13.0034	15.2025	14.4927	14.313	7.35959	14.0021	14.7244	10.0333	14.521	13.3745	10.0796	15.3115	11.8068	12.2552	13.4665	15.0154	7.93219	12.2876	13.13	14.0015	13.5017	15.1064	7.88922	5.10123	14.2742	12.9259	13.8922	14.6318	9.18541	13.3039	12.5304	13.1157	10.0901	14.5729	13.3254	13.962	13.3644	10.8675	14.3542	14.6396	14.6597	12.9723
testTCGA-97-7554-01A	16.0951	13.2082	14.1842	13.5764	15.1098	13.079	13.0015	13.5277	14.1073	14.6641	13.9315	6.26131	14.0407	14.4449	14.3987	14.2949	15.459	9.22559	15.3806	11.5812	11.6839	13.1218	15.5432	9.20203	12.0499	11.3481	14.0889	13.2828	15.1199	7.46724	5.01515	14.1855	12.3223	13.7567	14.6352	7.73429	12.3079	11.982	12.2408	11.1749	16.2933	11.9153	13.4141	13.2474	10.5842	14.243	14.3559	14.5125	12.0712
testTCGA-39-5029-01A	14.9766	13.3101	14.3628	13.8048	15.0822	13.1652	13.5909	13.2357	15.1488	14.9702	14.1454	5.37693	14.2916	14.815	12.2867	14.5341	14.2204	9.43962	15.3164	11.6901	12.0705	13.6849	15.0686	10.1121	12.0455	13.1177	14.3739	13.5507	15.1072	8.21859	5.37284	14.4662	13.0659	13.8976	14.659	8.84148	12.7763	12.958	13.3187	10.1673	15.1221	13.2446	13.9319	13.5041	11.2317	14.2932	14.423	14.448	12.4961
testTCGA-37-5819-01A	14.3184	12.7322	14.2735	13.222	15.1066	13.0729	13.0903	13.8699	14.9967	14.6642	14.2586	6.03499	13.9422	14.6555	10.9181	14.2691	13.8293	8.70724	15.388	11.7651	10.9598	13.1658	15.2796	7.68261	12.2648	12.6625	14.3167	13.5964	15.1789	7.81426	4.77814	14.2364	12.5342	13.8877	14.7292	7.6367	12.9626	12.1343	12.5764	10.2919	14.2929	12.8006	13.3014	12.7585	10.1943	13.9903	14.5937	14.0931	11.8435
testTCGA-66-2789-01A	14.0247	13.2079	14.3145	13.849	15.151	13.2667	13.9449	14.0011	14.7995	14.831	14.2376	6.69701	14.1194	14.7871	10.6547	14.5497	13.6121	9.39141	15.3451	11.5724	12.4052	13.4479	15.1199	9.17693	12.1516	13.3453	14.374	13.2616	15.0092	8.03651	4.88231	14.3298	12.8724	13.8985	14.6897	8.90058	13.1597	12.6936	13.2819	11.1053	14.4884	13.3594	13.8338	13.4758	11.3817	14.3522	14.7192	14.4077	12.3697
testTCGA-43-2581-01A	14.4518	13.2884	14.255	13.6813	15.0623	13.0966	12.9904	13.6239	14.4428	14.78	14.1123	6.99643	14.0605	14.5888	10.8998	14.309	13.3965	9.51735	15.3421	11.5077	12.1553	13.3692	15.6714	9.15933	11.9547	12.7954	14.0782	13.3446	15.0476	7.42407	5.2971	14.3172	12.2603	13.8171	14.6742	8.2153	12.7686	11.8914	11.9665	10.5192	14.6812	12.7472	13.4671	13.2815	10.9291	14.3477	14.5364	13.9479	12.2578
testTCGA-05-4396-01A	13.8694	13.254	14.5113	14.064	15.1291	13.0831	14.8627	13.4639	15.2035	14.3647	13.9627	8.02962	14.2051	14.6947	10.6308	14.3799	13.7381	11.3928	15.2842	12.3612	12.6072	13.5974	15.0836	10.153	12.4839	13.0381	14.5181	13.3929	14.9546	9.01532	6.69895	14.7531	13.0686	14.1543	14.5537	10.0463	13.4658	13.082	13.1961	11.1744	14.2589	13.2818	14.1477	14.5628	11.7927	14.351	14.5106	14.7206	13.5422
testTCGA-50-5044-01A	14.48	13.1792	14.4211	14.0462	15.039	13.291	13.4329	13.1966	15.1097	14.5293	14.3925	7.20933	14.3423	14.8851	10.2376	14.408	12.8611	9.52018	15.2152	11.9992	12.2735	14.0758	15.1575	9.03088	11.7658	13.4143	14.1336	13.7972	14.9085	8.1976	5.07773	14.4342	12.9926	13.7992	14.8077	8.9797	13.4232	13.0769	13.4069	10.3127	14.6248	12.8694	14.0308	13.6676	11.8384	14.301	14.6342	14.2324	12.5214
testTCGA-66-2783-01A	14.5337	13.1318	14.3648	13.504	15.069	13.2249	13.3943	13.0921	14.1066	14.8065	14.223	4.51502	14.1206	14.8434	10.44	14.5036	13.9352	8.6459	15.3349	11.6518	11.9087	13.9696	15.1455	8.32334	12.1002	13.1503	14.3993	13.5184	15.2324	7.92504	5.44585	14.4374	13.0108	13.9234	14.7255	8.21494	13.1925	12.4022	13.9357	9.80624	15.1659	13.0801	14.036	13.7907	10.4718	14.2618	14.3794	13.2956	12.1196
testTCGA-35-5375-01A	14.6896	13.0107	14.4304	13.7156	15.1023	13.3118	13.8151	14.1861	15.1148	14.5263	14.4491	7.60567	14.1929	14.9528	10.7413	14.711	13.6122	10.2185	15.2569	12.2006	12.1879	13.6744	14.9581	7.78635	12.0202	13.2629	14.5642	13.7334	14.9139	8.31441	5.30475	14.788	13.4066	14.0204	14.7819	8.46324	13.0854	12.6077	14.2781	10.411	14.957	13.5081	14.048	13.4733	11.3582	14.2324	14.8291	14.8408	13.0209
testTCGA-43-A56V-01A	14.906	12.9234	14.3224	13.7017	15.0256	12.861	13.7883	13.4102	15.3691	14.7147	14.208	6.72341	14.0871	14.7918	11.1341	14.4841	13.8594	9.93615	15.2568	11.7641	12.1649	13.817	14.9519	6.98653	12.2299	13.012	14.2359	13.4133	15.1673	8.11211	5.60505	14.4693	13.1588	13.9283	14.6127	8.87876	13.0121	13.0132	13.862	9.40206	14.7732	13.1706	14.2204	13.6987	10.8342	14.3698	14.5105	14.5136	12.7835
testTCGA-78-7156-01A	13.72	12.7956	14.0708	12.7443	15.0983	12.5992	15.2575	11.5978	15.2259	14.3363	14.4285	9.08249	14.2961	14.5501	12.8538	14.6149	13.361	9.89812	15.2644	13.2657	11.1811	13.7386	14.2514	7.19255	12.4297	13.9351	13.7204	13.4206	13.7603	8.85512	4.11781	14.4901	12.9938	13.9811	14.4769	9.51815	12.9652	13.0154	13.4971	11.4248	14.4277	13.4728	14.2219	14.5444	10.3397	14.3297	14.841	15.4698	12.4004
testTCGA-85-7699-01A	14.4859	13.0911	14.1706	13.1674	15.1595	12.6359	11.0072	13.7778	13.2099	15.3869	13.9402	2.64285	13.8818	14.2058	4.25708	14.3742	13.8234	6.52127	15.442	10.6429	10.9238	12.6152	15.3286	6.88376	11.9827	12.1308	13.4747	12.6352	16.0793	5.45859	3.82172	13.9309	11.8425	13.715	14.6054	5.65727	12.3267	9.71699	11.6525	9.52712	15.1465	12.8654	12.7519	12.1929	8.75892	13.8424	14.4977	12.124	11.2168
testTCGA-O2-A52S-01A	14.4576	12.6651	14.1187	13.4292	15.0798	12.5984	12.668	13.1119	14.8624	14.7447	13.9368	4.73849	14.1838	14.5073	7.1522	14.392	13.7468	7.74086	15.4247	11.2921	11.7852	13.1547	15.0802	8.72518	12.282	12.6013	13.8954	13.1076	15.2206	6.30398	4.88674	14.2818	12.2872	13.9685	14.4468	7.36758	13.1262	10.9951	11.1411	10.741	14.9896	12.5785	12.433	12.9631	9.07084	13.8267	14.5195	13.7528	11.6904
testTCGA-55-8512-01A	14.3921	13.1069	14.5703	14.7031	15.1246	12.9766	14.2217	13.2677	15.3492	14.8872	14.5014	12.8169	14.2953	14.8766	11.2297	14.3432	13.2749	13.6033	15.259	12.843	13.4921	13.789	15.233	12.7047	12.6026	13.5097	14.533	13.7095	14.9934	9.80758	7.31309	14.3568	13.7905	14.5542	14.6755	11.1391	13.8983	14.3997	12.7527	12.5933	14.9446	15.3434	14.2385	14.2303	12.5221	14.4025	14.5959	14.8361	14.2843
testTCGA-60-2724-01A	14.3087	13.0669	14.3578	14.0577	15.0567	12.8182	14.1437	12.9978	15.4965	14.9071	14.3012	6.36576	14.273	14.9617	10.4531	14.5309	12.9648	8.87801	15.2192	11.526	12.3007	14.1056	15.1584	7.07259	11.9094	13.5234	14.1997	13.3869	14.7814	7.43767	4.41643	14.4622	13.1406	13.7859	14.7373	9.31416	13.4146	13.2189	13.8625	9.55571	14.6073	13.445	14.115	13.6301	11.5821	14.3156	14.6685	14.4227	12.0466
testTCGA-77-8128-01A	14.0725	13.1601	14.3404	13.8222	15.0655	13.0823	13.5941	13.2365	15.2958	14.9137	14.019	5.97426	14.1985	14.767	8.80667	14.4203	13.2543	8.39104	15.2934	11.5554	12.2467	13.3673	14.8834	7.7196	12.2098	13.1349	14.4444	13.2995	15.0679	7.19026	5.11357	14.4825	12.7608	13.841	14.5532	9.50836	13.2401	12.4429	12.533	10.3615	14.5609	12.5841	13.5679	13.784	10.9143	14.1844	14.498	14.6908	12.1275
testTCGA-66-2778-01A	14.5562	13.116	14.2531	13.608	15.0817	13.0813	14.2458	13.1789	15.0242	14.6318	14.3494	5.47172	14.4193	15.1041	10.2753	14.6301	13.2399	8.70552	15.2108	11.7069	12.069	13.8205	15.152	7.01402	12.0097	13.251	14.2621	13.6064	14.9986	7.64813	4.8483	14.5918	13.2619	13.8671	14.7614	8.50465	13.4011	12.744	14.2395	9.65609	14.6951	13.717	14.1035	13.7857	11.538	14.2845	14.6033	14.4122	12.3276
testTCGA-66-2759-01A	14.8149	13.0648	14.2596	13.4603	15.0778	13.0229	13.4226	12.9324	15.0136	14.9205	14.1551	3.47372	14.2283	14.808	10.4624	14.5881	13.5651	7.89857	15.3603	11.4471	11.7845	13.6929	15.382	7.32485	12.0102	12.9386	14.3855	13.4848	15.3864	7.07247	5.55217	14.3256	13.0247	14.0082	14.6669	7.89987	12.9798	11.6279	14.1194	9.73556	14.7306	13.0333	13.7837	13.5077	10.3187	14.1484	14.3794	14.6255	11.6454
testTCGA-64-1677-01A	14.5933	13.0286	14.3443	13.7691	15.1373	13.3369	13.5107	13.4131	14.6595	14.2687	14.3272	6.71445	14.3365	14.8448	9.52567	14.5099	13.5704	9.40748	15.2788	11.8147	11.6474	13.2707	14.9775	6.92725	12.0875	12.9704	14.1783	13.5656	14.8338	7.58261	4.6779	14.519	12.6911	13.8129	14.7865	7.99471	13.0824	12.3875	13.2208	10.4979	14.9169	13.1222	13.6053	13.2829	11.1712	14.2998	14.7923	14.1735	12.556
testTCGA-MP-A4T9-01A	14.2123	13.2941	14.2048	14.5959	15.0716	12.777	13.6629	13.6677	14.927	14.9162	14.2744	11.7004	13.8833	14.6438	11.2444	14.379	12.8409	12.8974	15.1876	12.1404	13.5359	13.498	15.4347	11.991	12.2086	13.3047	14.133	13.1797	14.9137	8.50957	7.20927	14.241	12.8586	14.0304	14.5142	10.3166	13.3208	13.3028	11.4213	12.4202	14.427	13.4508	13.6513	13.6652	12.2652	14.2622	14.707	14.5204	13.6636
testTCGA-62-8402-01A	13.8386	12.9937	14.3641	13.12	15.156	12.6556	12.5957	13.0934	15.0347	14.6164	15.1794	5.40338	13.9275	14.6745	10.1315	14.2569	13.2301	7.82329	14.8659	11.4742	10.9686	13.5672	15.0973	7.20274	12.2312	12.9101	13.831	13.3438	15.4015	7.28796	3.95169	14.2211	12.0114	13.8274	14.5613	6.5384	12.6947	11.262	12.6477	10.1036	14.5556	13.1871	13.0927	12.4195	10.143	14.18	14.6636	14.7709	11.916
testTCGA-56-A49D-01A	14.3193	12.8824	14.1762	14.0186	15.0839	12.4171	13.3961	12.9792	15.2136	14.5929	14.2321	7.23371	14.1777	14.6971	9.88571	14.5108	13.1873	10.2774	15.297	11.5125	12.2189	13.4317	15.0499	8.25819	12.2006	12.642	13.9736	13.2802	14.9608	7.22784	5.70788	14.3449	12.6176	13.9318	14.6508	8.55695	13.1685	12.6403	12.6134	11.2673	14.4315	13.5267	13.7375	13.1014	10.736	14.2092	14.4985	14.6895	12.7848
testTCGA-22-4594-01A	15.512	12.9581	14.3266	12.9985	15.1349	12.9063	13.2496	14.3704	12.5253	14.8079	14.4582	3.83633	13.8736	14.6468	13.0059	14.4429	15.5124	8.00858	15.4656	11.4449	11.1877	13.9466	15.5075	8.73918	12.1278	12.3567	14.1386	13.5276	15.519	6.61937	3.97162	14.1561	12.246	13.845	14.7909	5.95302	11.8796	10.6895	12.7113	8.95503	16.0518	13.733	13.6126	12.9508	9.92079	14.4574	14.6463	12.478	11.6201
testTCGA-77-A5G6-01A	13.8708	13.1208	14.2789	13.7657	15.1052	12.6009	13.1295	13.1978	15.2809	14.8007	14.0822	4.39131	14.0417	14.465	8.77534	14.5227	13.4144	8.34167	15.3292	11.1985	11.6158	13.2024	14.834	7.01527	12.2181	12.9634	13.8978	13.139	15.2122	6.29643	5.2615	14.543	12.3166	13.9631	14.5729	7.65642	13.0515	11.7925	12.4783	10.3052	14.5607	12.3188	13.2088	13.1824	10.069	14.007	14.3618	14.6016	11.974
testTCGA-49-4512-01A	14.3463	13.085	14.4335	13.9735	15.0946	13.3517	13.7677	13.4397	15.3966	14.299	14.2612	8.39073	14.0249	14.8698	10.4018	14.3263	13.114	10.5864	15.2904	12.1193	12.1977	13.823	15.0682	9.35359	12.1348	13.1725	14.4547	13.6599	14.7827	8.62911	5.18757	14.4854	12.7936	13.9471	14.7557	9.79948	13.2803	13.3701	12.9392	11.1394	14.6503	13.1671	13.8807	13.6461	12.1768	14.416	14.535	14.77	13.132
testTCGA-05-4384-01A	14.1951	13.2642	14.3495	14.1826	15.081	12.9426	13.8998	13.0805	15.0613	14.6484	14.1927	9.14932	14.0058	14.6425	10.6653	14.3682	13.3378	11.6665	15.2397	12.4444	13.1049	13.592	15.2206	10.8516	12.3326	13.2808	14.021	13.3635	14.8017	8.46046	6.44068	14.5249	12.9066	13.8902	14.5707	10.2203	13.2124	13.0459	12.2482	11.4369	14.1436	13.3337	13.928	13.9853	11.7492	14.2813	14.6881	14.5758	13.4623
testTCGA-NC-A5HO-01A	14.2827	13.1016	14.4147	13.7726	15.0774	13.2571	13.5134	12.5441	15.5461	14.553	14.2999	6.27433	14.1414	14.8639	9.99894	14.5295	13.4179	9.84464	15.2838	11.7239	12.0556	13.602	14.9537	7.7349	12.22	13.2773	14.3299	13.6068	14.996	7.55923	5.34122	14.5148	13.1122	13.9188	14.7004	9.06235	13.2989	12.352	13.4559	9.95755	14.6123	13.0553	13.8292	13.9703	11.0769	14.3454	14.5663	14.865	12.8408
testTCGA-MP-A4T6-01A	14.397	13.0474	14.3296	14.0481	15.1249	12.7269	13.5115	13.671	15.0185	14.4226	14.0799	10.2108	13.5197	14.7155	10.6576	14.1389	13.4146	11.3855	15.3004	12.0787	12.6495	12.9862	15.2769	10.4337	12.6635	12.7314	13.916	13.1714	14.7759	8.39671	6.06459	14.4292	12.0603	14.122	14.3523	9.56347	12.7272	13.5938	12.3591	11.3018	14.2048	14.2963	13.2486	13.2217	11.6582	14.2411	14.5104	14.2474	13.3487
testTCGA-46-3768-01A	14.403	13.2932	14.4404	13.3818	15.0761	13.3112	14.0312	12.9209	15.4127	14.6994	14.2437	5.42628	14.3828	14.771	9.29654	14.5093	13.2002	9.15805	15.2576	12.167	12.3473	14.0114	15.0183	6.38154	12.1024	13.518	14.3754	13.6731	14.9169	8.26552	6.17242	14.7798	13.5122	14.3137	14.5846	9.29445	14.0123	12.296	13.5151	10.3587	14.7478	13.1079	14.1277	14.5615	10.3721	14.1838	14.5857	14.8995	12.5038
testTCGA-58-A46K-01A	14.4533	12.9573	14.4803	13.4422	15.0671	13.1851	13.6683	13.0543	14.8891	14.6288	14.3092	5.67287	14.114	14.7533	9.95934	14.5471	13.6685	8.75754	15.287	11.9003	12.0231	13.8245	15.1824	6.96156	12.2736	13.5968	14.4424	13.387	15.1327	8.07927	6.07799	14.3443	13.3578	14.1305	14.5535	8.51959	13.7375	12.0996	14.0057	10.4125	14.7579	13.2353	14.0594	14.1647	9.80491	14.2835	14.6364	14.3878	12.3716
testTCGA-50-5930-01A	15.41	13.127	14.2697	13.2553	15.1075	13.0575	13.1689	13.6942	14.1815	15.0005	14.197	4.83711	13.8876	14.5411	9.81491	14.3625	13.9375	9.05204	15.3214	11.438	11.6475	13.4675	14.9649	9.15327	12.1271	12.714	14.1359	13.5315	15.5728	7.32664	4.26567	14.2251	12.3627	13.5963	14.7676	7.93269	12.8624	11.6639	12.8975	10.1109	14.6592	12.9016	13.7367	13.3326	10.6713	14.3305	14.6956	11.5548	12.0846
testTCGA-66-2766-01A	14.5784	13.2461	14.4482	13.8313	15.0788	13.3916	14.2008	13.9131	15.3217	14.6109	14.3819	7.43615	14.412	14.9785	10.3541	14.6446	13.4306	10.0764	15.2549	12.0363	12.6993	13.7264	15.0193	7.46076	12.0868	13.3368	14.5996	13.6291	14.9107	8.63225	5.72194	14.5413	13.4362	14.1083	14.6878	9.70926	13.7977	13.0304	13.9207	10.9167	14.6847	13.3585	13.9151	13.8896	11.5344	14.2483	14.7913	14.6353	12.7373
testTCGA-50-6595-01A	14.7392	13.4022	14.5582	14.2079	15.0553	13.3506	13.445	13.5261	15.2627	14.6563	14.2731	7.69401	14.3059	14.8235	12.4646	14.4532	13.8343	10.1443	15.2396	11.8273	11.9994	13.3445	15.0292	8.85286	11.7518	13.6957	14.2445	13.4726	14.7933	8.17022	6.63121	14.4208	13.0439	14.0776	14.6227	8.90606	12.9178	12.723	12.9153	10.4183	15.3053	12.5656	13.6119	13.5726	11.7685	14.3539	14.6962	14.9863	12.6851
testTCGA-55-7283-01A	14.1964	13.3357	14.3082	14.1475	15.0785	12.8424	13.5739	12.6128	15.0092	14.444	14.0981	9.04641	14.2982	14.5804	9.63445	14.3746	12.8896	11.1497	15.2523	12.1436	12.6341	13.2709	15.1176	8.8803	12.188	13.1947	13.9538	13.3035	14.7706	7.94729	6.20193	14.4132	12.8067	14.0395	14.5761	9.12939	13.0951	12.8603	11.9589	11.8276	14.3152	13.1389	14.0256	13.9535	10.8716	14.2841	14.6032	14.6436	13.205
testTCGA-49-4490-01A	14.2332	13.3504	14.3621	14.0485	15.06	12.9374	14.1339	13.9189	15.3575	14.5483	14.1345	8.58695	13.9806	14.9241	10.4541	14.3352	12.9111	10.6165	15.2065	12.0553	12.1743	13.6518	14.9583	10.1256	12.1242	13.3389	14.4328	13.3292	14.8904	8.84226	5.85137	14.429	12.7333	14.02	14.6019	9.63065	13.2581	13.1684	12.8434	10.8418	14.5534	12.9113	13.8468	13.4721	12.0503	14.3124	14.6153	14.8426	12.9746
testTCGA-64-5779-01A	14.0632	12.7152	14.3017	13.3062	15.1692	13.0791	12.2057	14.0499	14.6959	14.9899	13.9023	4.31971	13.649	14.3483	5.68323	14.2472	14.4021	7.87864	15.4951	10.9957	10.9001	13.0294	15.1984	9.04781	12.2508	11.8464	14.0629	12.824	16.3138	6.60688	3.59472	13.9158	11.5556	13.624	14.732	6.16897	11.6823	10.5758	11.4693	10.2716	14.106	12.7023	13.0033	12.16	9.75663	14.3009	14.6648	11.394	11.8656
testTCGA-55-8620-01A	15.2178	12.952	14.5846	14.0289	15.174	13.2028	13.5607	14.3027	14.2664	14.6711	14.1674	8.51635	14.1631	14.536	14.8845	14.2383	15.0249	10.5126	15.3791	12.1095	11.2203	13.0208	15.3003	9.79098	12.5011	11.4826	14.8098	13.1433	15.0546	9.01222	5.86436	14.6479	12.5915	14.4881	14.5819	8.97401	13.4613	13.1797	12.2889	11.2412	16.1608	13.851	13.118	12.9311	10.0516	14.2391	14.5117	15.5902	12.4984
testTCGA-58-8391-01A	14.2567	12.9534	14.493	13.6548	15.0286	13.0533	13.9775	13.2372	15.2291	14.7291	14.1484	5.13634	14.1938	14.8885	10.2078	14.4998	13.4479	8.7538	15.2558	11.7791	12.1115	13.8993	15.0669	7.4203	12.1451	13.1806	14.693	13.4922	15.0558	7.87428	4.98054	14.4798	13.2794	13.9733	14.6513	9.06882	13.3379	12.7448	13.9173	9.7777	14.6805	13.0422	14.1024	14.2525	10.5183	14.3932	14.5437	14.7802	12.2895
testTCGA-38-4632-01A	14.6471	13.2767	14.4108	14.2234	15.0861	13.3642	13.9484	13.807	14.5891	14.5728	14.1525	8.79715	14.2957	15.0064	10.6942	14.4197	13.2814	10.8719	15.2333	12.2297	12.713	13.4182	15.3298	8.04608	11.9206	13.1023	14.3143	13.4044	14.8448	8.5182	5.93823	14.4057	13.0766	13.7364	14.7205	9.38164	13.1944	12.8158	13.4393	10.9038	15.3278	13.2507	14.1667	13.6787	11.7493	14.3006	14.6409	14.1029	13.0306
testTCGA-37-3783-01A	14.3849	12.982	14.3215	13.5788	15.0643	13.2012	13.6857	13.1076	15.0423	14.4627	14.2341	5.27415	14.2373	14.9989	9.22791	14.5667	13.301	8.48912	15.2445	11.719	11.5085	13.8962	14.9971	7.07725	11.9583	13.3175	14.0566	13.6758	15.1625	6.87709	4.93741	14.6547	12.9413	13.7073	14.7014	7.63265	12.974	11.8327	13.6111	8.65269	14.7619	13.4611	13.9118	13.5289	10.7943	14.4092	14.7617	13.4773	11.9217
testTCGA-37-4132-01A	15.5297	12.742	14.4626	13.1015	15.1423	12.8466	12.3116	13.8157	14.4917	14.7773	14.2272	4.28694	14.1641	14.6807	9.94235	14.5804	14.4271	8.05146	15.334	11.5489	11.1916	13.2875	15.4402	6.78679	12.1616	12.5252	14.4339	13.3334	14.923	7.20269	4.89702	14.241	12.3632	13.8152	14.7378	6.34155	12.255	11.6129	13.2868	9.92703	14.4317	13.3958	13.5677	12.5095	10.2103	14.1151	14.4139	13.884	11.4079
testTCGA-58-A46L-01A	14.0888	13.0651	14.2584	13.6931	15.1163	12.8828	13.1756	12.3841	15.2947	14.4904	14.2207	5.44325	14.2166	14.3982	8.19761	14.4439	13.6367	8.30769	15.3701	11.3698	11.6328	12.9375	15.1902	6.77667	12.3344	12.8375	13.9462	13.3301	14.9878	5.9703	4.81286	14.1043	12.032	13.8607	14.543	8.14465	13.2727	11.4263	11.736	9.777	14.5523	13.2238	13.4376	13.1879	9.85753	14.2471	14.716	14.7714	11.9057
testTCGA-18-3411-01A	14.5696	13.0509	14.4034	13.5952	15.0477	13.179	13.9958	13.3395	15.4725	14.6688	14.2387	5.8425	14.2645	14.8577	10.1159	14.5712	13.3905	9.25366	15.2111	12.0573	12.3597	14.0693	15.0139	7.10514	12.0107	13.2519	14.2981	13.6003	14.9595	8.07514	5.52461	14.7979	13.6484	13.8403	14.6996	9.13569	13.5701	12.7276	14.1505	9.45793	14.828	13.2001	14.3645	14.2871	10.4116	14.2814	14.6732	14.7789	12.4512
testTCGA-05-4395-01A	14.3665	13.4946	14.4673	14.2976	15.0033	13.6115	14.1151	13.3962	15.4298	14.4757	14.2902	8.81007	14.3352	14.9982	10.2167	14.4241	13.122	10.8329	15.1572	12.335	13.0261	13.9483	14.9598	9.11018	12.0018	13.6342	14.4047	13.4794	15.1455	9.01156	6.51707	14.7548	13.5169	13.858	14.6372	9.54993	13.3768	13.2688	13.6965	10.9101	14.6241	13.259	14.248	14.697	11.7953	14.3432	14.8249	14.8734	13.0329
testTCGA-63-A5MI-01A	14.1901	12.8807	14.193	13.8714	15.0813	12.7234	13.6951	13.2074	14.8126	14.7586	14.1408	5.82434	14.2624	14.704	8.83404	14.5144	13.6839	8.87695	15.2638	11.4593	11.7416	13.7627	14.9825	6.53494	12.1955	12.9882	14.0105	13.4116	14.7354	7.75324	4.42298	14.4133	12.8991	13.8658	14.6264	8.43394	13.4501	12.7643	13.3847	10.3489	14.7518	12.9228	13.8796	13.5048	10.7836	14.1815	14.554	14.7693	11.7254
testTCGA-33-6738-01A	14.5393	13.1889	14.3389	13.4231	15.0804	13.0244	14.1701	13.941	15.2155	14.7693	14.2155	6.99346	13.9732	14.9399	10.8501	14.4531	13.6742	10.1405	15.235	12.1318	12.3394	14.2723	14.9679	8.5674	12.1992	13.3769	14.639	13.6042	15.1065	9.15133	5.52167	14.6816	13.3722	14.216	14.6856	9.85817	13.4795	13.2294	14.0754	10.3894	14.7129	13.3767	14.2667	13.8777	11.7002	14.2459	14.5357	14.9272	12.8615
testTCGA-92-8063-01A	14.3805	13.2394	14.4731	13.9076	15.0309	13.0692	13.7339	13.673	15.4415	15.082	14.2842	6.7339	14.18	14.904	10.42	14.5179	13.1593	10.0157	15.196	12.1179	12.6887	13.9364	15.1342	8.76025	12.0613	13.1019	14.5095	13.5359	14.8612	8.31187	6.48037	14.4396	13.304	14.1605	14.5906	9.487	13.644	13.0423	13.9534	10.1038	14.7393	13.4132	14.1013	13.8811	11.068	14.1985	14.4859	15.0967	12.6369
testTCGA-43-2576-01A	14.7221	13.3231	14.3721	13.6098	15.0991	13.2863	13.4878	13.9803	14.1051	14.6092	14.182	6.51588	14.0565	14.7831	7.70755	14.3663	13.5862	9.69578	15.3018	11.7746	11.9272	13.9183	15.2966	8.57931	12.0927	12.8024	14.3832	13.6224	15.5305	8.10697	4.52787	14.293	12.6906	13.8762	14.7822	8.74379	12.9613	12.6434	12.8291	10.073	14.8844	13.0552	13.7495	13.3193	11.8252	14.3771	14.5973	12.5708	12.5649
testTCGA-77-8145-01A	14.1811	13.0165	14.355	13.8039	15.0852	12.9037	13.8275	13.4734	15.1447	14.8923	14.1851	5.73469	14.0638	14.6565	9.36736	14.3673	13.3882	9.05199	15.2557	11.3499	12.0272	13.7965	14.917	8.45044	12.1638	13.1294	14.3189	13.3804	15.0151	6.98154	4.74219	14.7036	12.5911	13.8295	14.6844	9.0022	13.254	12.552	13.0571	9.21332	14.6784	12.5108	13.5898	13.5769	10.9753	14.3241	14.4424	13.934	12.2372
testTCGA-49-4494-01A	14.5045	13.3318	14.5296	14.0117	15.0603	13.1426	14.1374	13.5061	15.4333	14.4416	14.2459	8.35432	14.307	15.0403	10.7122	14.4559	13.0396	10.6238	15.2344	12.08	12.6086	13.7414	15.0895	8.939	12.062	13.2985	14.4078	13.5396	14.7999	8.36446	6.45286	14.5555	13.12	13.861	14.6719	8.9972	13.2876	13.0603	13.3386	10.3498	14.5184	13.0512	13.9429	14.0355	11.4686	14.2544	14.6398	14.8074	13.1122
testTCGA-77-8150-01A	14.417	12.9001	14.2846	13.6204	15.0773	12.9145	12.767	13.0656	15.1908	14.6341	14.1258	4.9706	14.0276	14.7035	9.4737	14.3618	13.4077	8.07193	15.3202	11.4644	11.6879	13.2555	15.0587	6.92722	12.1427	12.5459	14.1544	13.3791	15.2012	6.80145	4.82142	14.2331	12.5955	13.7153	14.6761	7.72633	13.1634	11.7623	12.6402	10.0077	14.7639	12.8473	13.2455	13.1934	10.0944	14.1193	14.5334	14.2648	12.1661
testTCGA-22-4595-01A	14.4929	13.1321	14.3506	13.8427	15.1153	13.1241	13.169	13.3718	15.3519	14.838	14.1481	5.46208	14.1957	14.7619	10.2813	14.464	13.3973	9.04041	15.3692	11.7174	11.7375	13.4154	15.289	8.5644	12.1226	12.9075	14.3539	13.4886	15.1265	7.38239	4.95123	14.4716	12.624	14.1261	14.658	8.71587	13.2067	12.5079	12.7772	10.7354	14.5226	13.0913	13.5937	13.4713	10.9894	14.4437	14.1631	13.721	12.1466
testTCGA-68-7756-01A	14.7017	13.151	14.3913	13.9308	15.0625	13.0825	13.8174	13.1197	15.2478	14.8465	14.1569	5.8809	14.3046	14.7948	12.2077	14.4961	14.0638	9.31107	15.2062	11.9283	12.2983	14.0465	15.1599	8.31583	12.0293	13.4559	14.2866	13.4753	14.9653	8.12088	5.30087	14.5142	13.3057	13.8373	14.7048	8.98297	13.5663	12.7988	14.0829	9.71198	15.1199	12.8645	14.1991	14.1829	10.9849	14.4162	14.4802	14.8091	12.6741
testTCGA-18-3417-01A	14.5685	13.2867	14.4679	13.9867	15.0601	13.3982	13.9818	13.7693	15.1923	14.7602	14.2612	8.12919	14.2549	14.8938	10.7911	14.4708	13.6338	10.1411	15.1891	11.956	12.3036	14.1254	14.9978	8.53622	11.9733	13.5312	14.5251	13.6867	15.0088	8.59677	4.78773	14.5914	13.3135	13.8995	14.812	9.85247	13.5631	13.2883	13.8436	10.4296	14.4945	13.4822	14.3683	14.2617	11.6799	14.4806	14.6381	13.8259	12.636
testTCGA-70-6722-01A	14.6402	13.2307	14.392	14.1429	15.0499	13.2238	13.4705	13.0974	15.7795	14.9424	14.1026	5.81859	14.186	14.6725	11.6172	14.3822	13.3175	9.40949	15.2214	11.5814	11.8272	13.6204	15.2494	7.4185	11.8805	13.1927	13.9262	13.3673	15.0063	7.7251	5.91613	14.2764	12.7605	13.9515	14.5806	8.63652	12.8623	12.5132	13.0354	9.82357	14.5949	12.702	13.9147	13.5768	11.323	14.3159	14.3914	13.8064	12.3416
testTCGA-78-7167-01A	13.9923	13.0389	14.3273	13.8727	15.0845	12.9223	14.4908	13.246	15.2494	14.4754	14.1396	8.76362	13.9388	14.6267	11.1905	14.3419	13.6076	11.162	15.2222	12.7083	12.934	13.7917	14.9896	8.67221	12.473	13.2364	14.1361	13.2825	14.5269	9.09951	5.6792	14.5907	13.0131	13.8145	14.5211	10.1169	12.8724	13.3844	12.991	11.37	14.7405	12.8482	13.8377	14.1604	11.4901	14.3253	14.588	14.855	13.5491
testTCGA-55-6981-01A	14.3973	13.1528	14.3857	14.1109	15.0584	13.0331	14.1858	14.1555	14.8774	14.5759	14.1432	9.3054	14.0084	14.8481	11.131	14.2847	12.9827	11.4583	15.2522	12.032	12.6721	13.9869	15.1386	9.46607	12.1446	13.1706	14.4615	13.3825	15.0511	9.12189	6.31041	14.4502	13.0117	13.9633	14.6117	10.1856	13.199	13.4822	13.1416	11.214	14.7319	12.748	13.9865	13.8793	12.3521	14.4095	14.3986	14.7188	13.2421
testTCGA-66-2754-01A	14.212	12.6976	14.3968	13.7945	15.1049	13.022	13.6529	13.5179	15.1776	14.3989	14.1699	7.31227	14.2527	14.8555	10.6233	14.3144	13.9355	9.2142	15.3202	12.0368	10.8064	13.3034	15.0349	6.55502	12.3477	13.1316	14.3552	12.9288	15.0393	8.12378	4.59994	14.6784	12.8426	14.3863	14.5007	8.06645	13.4259	12.5526	12.9482	11.5946	14.6022	13.5163	13.0853	13.2197	10.0392	13.9176	14.8657	15.0343	11.5971
testTCGA-66-2795-01A	14.5081	13.345	14.3907	13.5675	15.0926	13.6757	13.7078	12.616	15.23	14.3959	14.1286	5.50107	14.3609	14.6428	8.08606	14.5698	13.5491	8.61063	15.3141	11.8709	11.8272	13.8114	15.031	7.1953	12.0935	13.3947	14.1331	13.5729	14.7701	7.64788	5.25541	14.7118	13.1816	13.8828	14.7029	8.60434	13.182	11.9916	13.6097	10.4086	14.4381	12.9449	13.903	14.0244	10.4444	14.1608	14.7749	14.0087	12.1057
testTCGA-73-4666-01A	14.5148	13.4945	14.3091	14.1246	15.0652	12.9914	13.9607	13.5844	15.3157	14.3994	14.1252	8.49291	14.3227	14.8869	9.94664	14.4075	13.0324	11.0519	15.2876	12.3131	12.7876	13.4867	15.2884	9.06609	11.9965	13.4135	13.8275	13.4042	14.8165	9.59922	7.69295	14.5027	13.1941	14.1729	14.5077	9.04535	13.2678	12.9841	13.0583	11.2534	14.0922	13.1963	13.8265	13.6501	11.5042	14.2431	14.4349	14.9662	13.1351
testTCGA-39-5028-01A	14.4383	13.0902	14.4183	14.0015	15.0807	13.3395	13.6697	13.0139	14.015	14.8433	14.2728	6.18062	14.2397	14.8277	10.0269	14.4478	13.2062	9.27065	15.3289	11.5823	12.0246	13.7513	15.2017	9.06172	11.9939	13.2141	14.301	13.5775	15.2493	7.53433	5.27148	14.481	13.057	13.8075	14.8039	8.71316	13.0176	12.7355	13.5355	9.69805	14.9083	13.4655	14.0944	13.3847	11.413	14.2838	14.4975	11.9006	12.3026
testTCGA-91-6848-01A	16.4887	12.6198	13.9849	13.4876	15.0458	12.3325	10.9235	13.301	14.0965	14.7925	14.1166	3.36155	14.2899	14.5989	17.9729	14.2747	16.5905	5.58344	15.347	10.7939	10.9205	13.1006	15.235	6.15212	11.5939	12.7692	13.1801	12.8776	14.3165	6.01251	3.43977	13.8868	11.7685	13.5641	14.5635	5.92609	12.7815	9.80884	11.0419	9.97428	18.9236	11.8461	12.3697	11.4026	9.35321	13.7422	14.6883	15.423	10.2869
testTCGA-21-5787-01A	14.8108	13.2714	14.403	13.6511	15.0913	12.9528	13.0435	13.2448	15.3926	14.5658	14.1388	5.06283	14.1759	14.8964	10.9692	14.4292	13.757	8.88131	15.2485	11.8524	11.282	13.6888	15.1695	7.61855	11.9738	12.8683	13.9849	13.5429	15.0403	7.19643	5.06345	14.4233	12.8463	13.921	14.7409	7.90435	13.1652	12.4871	13.1539	10.2125	14.994	13.4118	13.7934	13.2166	10.9888	14.063	14.6176	14.6821	12.3023
testTCGA-64-1680-01A	14.0841	13.3269	14.3582	14.0354	15.0888	13.2343	14.1322	12.8105	15.2816	14.3019	14.2417	8.85682	14.4371	14.7074	10.5599	14.4954	13.2251	10.717	15.2055	12.367	12.5432	13.3679	14.7683	7.90747	12.1876	13.6921	14.3922	13.4759	14.35	8.50097	5.52787	14.575	13.0765	13.971	14.6224	8.9724	13.3387	13.0716	13.1728	11.2283	14.5658	13.3004	14.1787	14.2835	11.4677	14.4036	14.8359	15.0784	13.3674
testTCGA-22-4591-01A	14.1442	13.2268	14.3579	13.9172	15.1034	12.9382	14.5776	14.4598	15.0389	14.9818	14.0804	8.52357	14.0977	14.8847	10.2029	14.5237	13.5046	11.186	15.2891	11.9769	12.8488	13.5399	14.8126	8.14057	12.2562	13.113	14.5413	13.4132	14.9887	9.54373	6.44907	14.7306	13.2153	14.3638	14.5344	9.66906	13.5419	13.22	13.7935	11.6529	14.7184	13.2941	13.8668	13.5937	11.5779	14.1804	14.5215	14.4994	13.2344
testTCGA-21-1079-01A	14.3437	13.1377	14.4265	14.2221	15.062	13.0646	13.8858	13.2175	15.5903	14.9742	14.2873	6.50766	14.3497	14.8757	12.6627	14.597	13.4859	9.32925	15.2198	11.3968	12.2617	13.7243	15.0523	9.06867	11.882	13.4073	14.1619	13.4732	14.8756	7.03311	4.40568	14.4197	12.9231	13.6395	14.651	8.9669	13.248	13.0821	13.3301	8.72345	14.7129	12.8084	13.974	13.6972	11.3461	14.3645	14.5443	14.9557	12.2877
testTCGA-77-8143-01A	14.1312	13.0155	14.2324	13.8172	15.0894	12.6153	14.1324	12.8279	15.4387	14.7656	14.1231	5.23278	14.275	14.8263	10.4002	14.483	13.4422	8.75346	15.2418	11.5705	11.8376	13.6837	14.9275	5.67917	12.2062	12.9732	13.8372	13.4208	14.9523	7.99629	4.5764	14.5271	12.946	13.8478	14.6316	9.05744	13.2929	13.0488	13.7345	9.91839	14.4544	13.2476	14.0586	13.3504	11.0007	14.3363	14.3592	14.794	12.3915
testTCGA-50-5933-01A	14.2928	13.4098	14.3736	14.272	15.1041	13.2752	13.7089	13.3447	15.1456	14.4929	14.129	8.40543	14.2966	14.6624	9.72623	14.346	12.7383	10.6689	15.3145	11.9959	12.2407	13.5375	15.5958	10.6002	11.8406	13.5163	13.9038	13.5143	14.8847	8.9725	6.92529	14.4043	12.8125	13.9233	14.5676	9.21104	13.0956	12.5614	12.276	11.1288	14.6684	12.7642	13.8709	13.3317	11.8676	14.3028	14.5538	13.8439	12.758
testTCGA-91-6849-01A	14.6561	13.1698	14.4246	13.5397	15.115	13.1096	14.3773	13.2611	14.8751	14.2309	14.4643	7.78968	14.0497	14.6005	12.5041	14.3848	14.5771	10.473	15.2656	12.3448	12.0919	13.7968	15.1168	8.57216	12.2166	13.211	14.1296	13.6528	15.031	8.58145	4.9676	14.4506	13.5662	13.9061	14.7402	9.96439	13.1377	12.8714	13.0257	10.9899	15.3331	13.4883	13.8198	13.9584	11.4384	14.3061	14.6016	14.3068	13.1015
testTCGA-98-8020-01A	14.3162	13.1382	14.3098	14.1805	15.0649	12.9209	13.1823	12.7257	15.1939	15.115	14.2325	4.99118	14.2621	14.6912	11.3215	14.4404	12.8593	8.26288	15.215	11.103	12.2312	13.3357	15.2858	8.5622	11.8464	13.148	13.9449	13.3995	15.0087	6.62949	4.73521	14.2827	12.5607	13.6441	14.6974	8.40946	13.0928	12.8359	12.91	9.3059	14.4012	13.1025	13.8379	13.2537	10.9793	14.3616	14.4169	14.4425	11.9056
testTCGA-MP-A4TD-01A	14.7268	12.8794	14.3893	13.7507	15.1048	13.1225	13.1362	13.614	14.9195	14.3959	14.0778	7.75853	13.863	14.6399	10.9666	14.1854	13.7906	9.60678	15.3325	11.7848	11.5871	13.5034	15.08	8.98641	12.214	12.819	14.3848	13.2024	15.0006	7.79301	4.02866	14.2907	12.4681	13.7034	14.7283	8.77805	12.7774	12.5225	12.3146	10.3926	14.8884	12.9056	13.4204	13.3233	11.124	14.2725	14.5737	13.285	12.7684
testTCGA-34-8455-01A	14.3837	13.1685	14.2708	14.0483	15.0759	12.9976	13.4878	13.0307	15.1646	14.9884	14.1838	6.41432	14.2307	14.7012	10.3911	14.4541	13.4052	9.73208	15.2159	11.6868	12.2883	13.6814	15.1258	8.34207	12.0479	13.2984	14.1511	13.5181	14.9218	7.7888	5.11466	14.4243	13.0799	13.8132	14.6452	8.58495	13.4217	12.7333	13.5752	9.73876	14.9278	13.2373	14.247	13.8372	11.2109	14.3395	14.44	13.8434	12.5919
testTCGA-33-4586-01A	14.2267	13.3181	14.3199	13.5729	15.046	13.3359	13.9928	13.2453	15.3998	14.8001	14.2008	6.07061	14.3667	14.7452	9.60811	14.5284	13.0351	8.79002	15.2601	11.746	12.6418	13.8113	15.141	8.03411	12.0489	13.5409	14.5243	13.4554	15.0843	7.76646	6.26187	14.6366	13.4909	13.9639	14.5976	9.31033	13.7056	12.5061	13.791	10.5987	14.5723	12.6991	14.229	14.611	10.1774	14.2328	14.5523	14.7897	12.139
testTCGA-39-5024-01A	14.3229	13.2318	14.3921	13.9017	15.0486	13.0671	13.5237	12.6616	15.3473	14.654	14.2095	5.85502	14.2132	14.8007	10.0886	14.4761	13.2329	9.43087	15.2326	11.7027	11.8871	13.999	15.0565	7.36483	12.0917	13.3816	14.2237	13.6034	15.1041	7.38452	5.56674	14.483	13.1106	13.8209	14.6962	8.32816	13.4075	12.6526	13.8646	9.8308	14.5857	13.1758	14.1916	13.7563	11.0571	14.3171	14.4179	14.7869	12.6897
testTCGA-85-8277-01A	14.2427	12.7981	14.3811	13.454	15.0513	13.0519	13.1147	12.9848	15.6318	14.7256	14.1866	5.51099	14.218	14.7675	8.87979	14.4248	13.6417	8.40162	15.3384	11.8049	11.9777	13.8747	15.0544	5.86452	12.0729	13.0245	14.5121	13.544	15.0063	7.85778	4.56024	14.281	13.0008	13.9692	14.6475	8.11733	13.1828	12.2067	13.4185	10.7153	15.045	13.282	13.861	13.8078	10.3175	14.2301	14.6379	12.4539	12.0352
testTCGA-85-6798-01A	14.1979	13.1633	14.4972	13.8197	15.0615	12.8832	13.634	13.3983	15.1658	14.8402	14.1047	5.00961	14.1986	14.8536	9.52681	14.462	13.1105	8.41443	15.2531	11.7104	11.9628	13.7977	15.1581	6.69829	12.0078	13.1222	14.3609	13.34	15.1338	7.34431	4.45381	14.3694	13.142	13.9523	14.7424	8.58642	13.3709	12.479	13.876	10.1105	14.6295	12.8539	13.8004	13.8132	10.6567	14.2733	14.5162	14.6166	11.9874
testTCGA-85-8353-01A	14.0139	12.9982	14.3886	13.653	15.1121	13.1113	12.751	13.4535	13.9443	14.8321	14.1526	4.80898	13.9532	14.487	8.89343	14.3765	13.4406	8.4412	15.3553	11.3027	11.66	13.5447	15.3881	8.1562	12.0279	12.6074	14.2037	13.324	15.2592	6.66206	4.70512	14.1759	12.4721	13.8568	14.7154	7.6797	12.6625	11.4575	12.8254	9.93437	14.8768	12.8005	13.5412	13.353	10.4172	14.3515	14.4936	12.2463	12.0515
testTCGA-64-5775-01A	14.4539	13.0197	14.3363	14.4183	15.0227	13.176	13.3637	13.608	15.4757	14.5205	14.2293	8.29336	14.4912	14.8115	11.0191	14.5042	13.1742	9.54449	15.2409	12.0057	12.2083	13.51	14.9217	8.204	11.4198	13.5769	14.043	13.7087	14.4704	8.87281	4.1789	14.4303	12.7187	13.7132	14.6952	8.48311	13.049	12.42	12.4756	9.93678	15.143	11.7584	13.5937	12.7715	12.1923	14.0656	14.6351	15.0099	12.1002
testTCGA-38-6178-01A	14.101	13.3439	14.3668	13.9752	15.0891	13.0155	13.6721	14.1956	14.8123	14.8299	14.0731	8.18871	13.9719	14.6555	10.4541	14.2608	13.3008	10.8548	15.3018	12.0456	12.5441	13.2995	15.1736	10.6878	12.1539	13.0877	14.16	13.2451	14.8732	8.51883	6.97067	14.362	12.5266	14.1623	14.5142	9.43337	12.6467	12.8167	12.4075	11.6514	14.5547	12.6887	13.6978	13.601	11.7136	14.2682	14.4049	14.1096	12.9251
testTCGA-MP-A4T7-01A	14.3572	13.2278	14.3419	14.4549	15.0669	12.951	14.1131	12.7115	15.1595	14.5364	14.291	10.1062	14.1633	14.7255	10.6694	14.3859	13.3553	12.2814	15.1489	12.4498	12.8353	13.7342	15.099	9.55607	12.3632	13.229	14.1482	13.4595	14.9038	8.81228	6.45571	14.5898	13.323	13.9825	14.6805	10.4707	13.848	13.5801	12.6989	11.6525	14.411	14.1439	14.0441	14.2802	12.0886	14.3215	14.7187	14.7094	13.6056
testTCGA-86-8359-01A	14.5032	13.2653	14.3778	13.7734	15.1021	13.0914	13.4523	13.7578	15.5192	14.55	13.9846	7.29453	14.0044	14.729	10.525	14.1765	13.631	10.1187	15.3117	12.0133	12.007	13.4711	15.2469	9.16073	12.1736	12.8592	14.2131	13.4613	15.0552	7.81906	5.37722	14.6363	12.7343	13.8744	14.6682	8.47164	12.3607	12.5685	12.4607	11.206	13.6191	13.0162	13.5852	13.7827	11.3137	14.3155	14.4861	14.1844	12.9218
testTCGA-50-5051-01A	14.4359	12.9262	14.3901	13.7416	15.0852	13.1785	13.7908	13.124	15.3094	14.3172	14.2733	7.37755	14.1123	14.7251	11.0185	14.377	13.5066	9.89212	15.2402	12.0773	12.0406	13.7384	15.0403	8.83409	12.285	13.0112	14.5045	13.6045	14.895	8.26003	4.9417	14.5516	12.8079	13.8087	14.7415	9.49116	13.1855	13.0906	13.0226	10.5454	14.6656	13.1268	13.9103	13.8472	11.2349	14.4539	14.5847	14.6243	12.8219
testTCGA-49-4507-01A	14.743	13.176	14.4197	13.6729	15.0603	13.3555	13.3868	13.2817	15.4447	14.4824	14.286	6.38186	14.1151	15.0017	9.86749	14.4917	13.4979	9.56058	15.2523	12.1152	12.0991	13.7751	15.1569	8.35597	12.0216	13.0158	14.299	13.7319	15.1253	8.38489	5.4454	14.4337	13.0451	13.7415	14.7592	8.43355	12.9141	12.5614	13.5081	9.79489	14.5874	13.0995	13.9838	13.7156	11.5902	14.1579	14.7633	14.3867	12.4663
testTCGA-62-8394-01A	14.1419	13.2491	14.4239	13.7981	15.0979	12.65	13.6599	13.7263	15.3705	14.5847	14.163	7.80959	14.0188	14.8343	9.88967	14.3475	13.1598	10.489	15.3612	12.1314	12.0072	13.5458	15.0389	9.3004	12.2298	13.03	14.3582	13.4354	15.0139	8.23213	6.39098	14.3144	12.4371	14.1672	14.487	8.88076	13.3375	12.3945	12.8745	10.7608	14.5267	12.9694	13.5679	13.1527	11.3862	14.21	14.4636	14.7138	12.8888
testTCGA-51-4080-01A	14.0049	13.1875	14.3905	13.4616	15.076	13.2551	13.6008	12.6944	15.1693	14.5714	14.1124	5.79167	14.3689	14.7396	8.3905	14.5914	13.5355	8.19528	15.2836	11.787	11.8228	13.4609	14.5965	5.91673	12.2166	13.8028	14.3054	13.2429	14.9776	7.84386	5.08356	14.5762	13.3324	14.1935	14.5484	8.80749	13.4303	11.9919	13.5983	10.8493	14.6748	13.0809	13.8417	14.0843	10.1906	13.9671	14.7947	15.0201	12.0016
testTCGA-78-7145-01A	14.092	13.5561	14.295	14.2054	15.0864	13.2261	13.4205	13.5757	15.3332	14.5933	14.1852	8.47313	14.1279	14.7207	9.67522	14.3937	12.625	10.8488	15.2304	12.049	12.5309	13.5056	15.2599	10.4082	11.9987	13.6343	14.2414	13.5342	14.8578	8.16401	7.19156	14.7833	12.9829	13.9915	14.5683	8.93492	13.1709	12.4426	12.48	11.6008	14.5866	12.8771	14.4165	14.0396	11.2309	14.3424	14.6085	14.9198	13.0137
testTCGA-05-4418-01A	14.8049	13.1474	14.4646	13.6093	15.0709	13.164	13.5438	13.0519	14.5607	14.5867	14.2816	6.11761	14.1083	14.8029	9.9786	14.449	13.8158	9.48796	15.235	11.8607	11.7565	13.7385	15.1214	7.93182	12.0841	12.836	14.1853	13.5501	15.3135	7.84691	4.8283	14.4776	13.1966	13.8858	14.784	8.75433	13.1206	12.3086	13.6853	10.2688	15.07	13.911	14.1069	14.0461	11.1426	14.3875	14.6459	13.2784	12.3845
testTCGA-58-8386-01A	13.9268	13.1895	14.3179	14.2412	15.0562	12.7717	13.3309	12.6565	15.0943	14.8981	14.1747	6.85562	14.3893	14.6213	10.1914	14.4435	12.8283	9.40238	15.2831	11.5337	12.3766	13.5256	15.3831	9.43568	12.018	13.0794	14.0238	13.2077	15.0413	6.93135	5.34108	14.4467	12.8746	13.9235	14.6758	9.15486	13.5327	12.7717	12.0716	10.5837	14.5435	13.2019	13.4147	13.6232	10.8668	14.2967	14.4982	14.5054	12.314
testTCGA-49-6743-01A	14.9072	13.2674	14.0869	13.5717	15.1345	12.8298	13.8762	14.0767	15.1492	14.7161	14.1158	6.2298	14.0406	14.6298	8.49018	14.3329	13.5075	9.61956	15.3386	12.0156	12.445	13.713	15.3621	10.2673	12.1499	12.9827	14.2522	13.4128	15.6362	7.85119	6.79053	14.6163	12.8505	14.0172	14.5354	9.18667	13.0054	12.0892	12.5618	11.1601	14.6959	12.9594	13.8714	13.6694	10.8646	14.2071	14.6055	13.0901	12.4447
testTCGA-NC-A5HF-01A	14.1259	13.0128	14.3246	14.0409	15.0399	13.0695	14.2765	13.4961	15.5922	14.8726	14.3074	6.00171	14.3201	14.8235	11.0769	14.5092	13.0609	9.56783	15.2315	11.7586	12.9161	13.5307	15.1821	7.49254	12.2504	13.1279	14.2768	13.3154	14.7495	8.10789	5.48698	14.5385	13.028	13.8707	14.5294	9.60487	13.4652	13.3729	14.0443	9.95868	14.6303	13.3611	14.0931	13.7125	11.3332	14.5301	14.5913	14.7191	12.804
testTCGA-78-7160-01A	14.5396	13.3057	14.3491	13.5896	15.0939	13.0001	13.6591	13.1417	15.2228	14.4892	14.0319	6.83019	14.0945	14.5204	8.22698	14.3272	13.1562	9.41641	15.2784	12.1475	11.7744	13.4664	15.0817	9.50969	12.1545	13.2552	14.0744	13.1839	15.3297	7.65777	5.81018	14.7459	12.8917	13.9307	14.6029	9.0474	12.9631	12.1995	12.508	10.544	14.454	12.7352	13.7394	14.2738	10.4379	14.2271	14.5296	14.2639	12.4931
testTCGA-NC-A5HP-01A	14.1128	13.0701	14.3323	14.019	15.0751	13.1215	14.141	13.2016	15.3962	14.7395	14.1804	7.91374	14.0384	14.8019	9.88324	14.4313	13.5101	10.0081	15.2598	11.8017	12.6214	13.5351	14.9916	8.7927	12.2839	13.3065	14.2064	13.3161	14.9257	7.31578	5.13383	14.4461	12.8228	13.8048	14.5052	9.66788	13.3414	12.838	12.93	10.6893	14.6207	12.8374	13.5988	13.8229	11.7483	14.2309	14.6593	14.6649	12.6234
testTCGA-NJ-A7XG-01A	14.1258	13.0954	14.3446	14.0762	15.0415	12.8606	14.1599	13.2863	15.3052	14.1956	14.1416	10.0056	14.2046	14.6485	11.593	14.2939	12.8756	11.4133	15.1753	12.2866	12.9498	13.1924	14.9554	8.20301	12.3682	13.4746	14.4639	13.3337	13.8645	8.72719	5.70377	14.3686	12.6719	13.8447	14.5458	9.80622	12.9437	13.5877	13.1024	10.8834	14.4605	12.8892	14.0114	13.7614	11.6185	14.46	14.5498	14.8499	13.5694
testTCGA-05-4415-01A	14.5071	12.8498	14.3706	13.7359	14.9794	12.2989	13.5342	12.8263	15.4044	14.6204	14.2779	5.48133	14.2292	14.7631	10.2257	14.4526	13.4797	9.07417	15.1777	12.1309	11.721	13.8631	14.9543	6.09905	11.8069	12.86	13.7644	13.6027	14.837	7.37256	5.53629	14.6002	13.43	13.6517	14.6451	9.57994	13.5802	11.8214	13.0882	9.97915	14.8777	13.3504	14.218	14.0268	10.2505	14.124	14.6491	14.5187	11.5714
testTCGA-53-7813-01A	14.5676	12.8143	14.3521	13.6516	15.1232	13.4936	13.4144	13.8181	14.7019	14.5167	14.1456	7.10446	13.9657	14.5982	9.14741	14.394	13.5131	10.2143	15.305	11.7737	11.9545	13.7669	14.9008	8.29286	12.2754	12.721	14.5228	13.5955	15.1228	8.38524	5.08946	14.4693	12.7137	13.8892	14.7314	8.75456	12.9415	12.6917	13.2216	10.9425	14.4909	13.1198	13.8585	13.6216	11.3825	14.3937	14.4804	14.0074	12.8892
testTCGA-73-4659-01A	14.4733	13.2026	14.3774	14.3119	15.0856	12.9247	13.9254	13.4833	14.776	14.6346	14.1985	10.3847	14.2719	14.8165	10.398	14.4117	13.2785	11.9577	15.252	12.4434	12.8137	13.8187	15.3443	11.3555	12.2034	13.2368	14.3422	13.4211	14.9863	8.31656	6.29474	14.5802	13.2958	14.0566	14.719	9.67234	13.2897	13.3464	12.439	11.44	14.0168	13.5247	14.0742	14.1218	11.3781	14.3517	14.5863	14.0944	13.4323
testTCGA-85-8352-01A	14.3725	12.977	14.3949	13.6522	15.1096	12.8941	13.3947	13.7534	15.3794	14.3894	14.355	6.40154	14.0985	14.7084	8.41725	14.5587	13.0398	9.04037	15.2345	11.8123	11.8622	13.2919	14.6961	6.80044	12.1806	12.9239	14.5658	13.383	14.9782	7.54423	3.91577	14.5169	12.6483	14.0923	14.597	9.00914	13.1808	12.558	12.193	10.6285	14.8267	13.2763	13.4987	13.2444	11.2809	14.1396	14.4469	15.0367	12.2363
testTCGA-78-7220-01A	14.3622	13.4839	14.5155	14.1028	15.1129	13.0586	14.4631	13.4465	15.4184	14.6205	14.2224	7.42176	14.2404	14.7622	10.7436	14.5171	13.9093	10.4218	15.1709	12.483	12.1446	13.4624	15.0526	8.18934	12.4162	13.4569	14.7087	13.3175	14.8368	8.67682	6.11227	15.1078	13.8481	14.1735	14.5352	10.0081	14.2349	12.6563	13.9988	10.8283	14.8229	13.834	14.3323	15.1593	10.7637	14.529	14.6804	15.1405	13.1502
testTCGA-55-A48Z-01A	14.4884	12.6768	14.3314	13.3132	15.1033	12.8308	12.1787	13.7376	15.4056	14.4768	14.0951	6.22932	13.6107	14.5882	9.87349	14.0743	13.3489	9.27728	15.426	11.4435	11.3284	13.7709	15.0029	9.61205	12.2098	12.2669	14.4602	13.2488	15.0109	8.08304	4.83393	14.0976	11.8457	13.7159	14.5216	7.98553	12.0167	11.9712	11.5749	10.4405	14.9249	12.3983	12.5551	12.0447	10.9468	14.0301	14.3999	12.054	12.2273
testTCGA-50-6593-01A	14.4336	13.3315	14.3355	14.1292	15.0815	13.1347	13.9207	13.8185	15.0403	14.6453	14.1729	8.66733	14.1544	14.8455	10.449	14.3087	13.1345	10.9309	15.3205	12.171	12.5869	13.5997	15.3228	9.63494	12.1043	13.2582	14.3176	13.3578	14.8985	8.70098	6.12774	14.4001	12.8847	13.9703	14.642	9.80297	13.2601	13.1038	12.74	10.9689	14.7094	13.1285	13.9126	13.7807	11.9957	14.4009	14.4249	14.304	13.1666
testTCGA-55-6968-01A	17.1236	12.7137	14.2748	12.573	15.2118	12.6484	12.0801	13.1872	14.9354	14.8413	13.8781	4.19669	13.8624	14.477	NA	14.2564	12.1237	7.6265	15.558	11.2392	10.682	13.2508	15.5869	9.19601	12.2867	12.3009	14.4178	12.9684	19.0988	7.12364	3.94146	14.2995	11.8652	13.8671	14.6088	6.2811	12.3262	11.0519	11.6428	10.1419	13.2021	12.3265	12.4948	11.2338	8.84388	14.013	14.2496	5.42288	11.4419
testTCGA-78-7154-01A	14.1579	13.258	14.4437	13.9404	15.0455	13.2697	14.4269	13.7736	15.2489	14.4764	14.1566	8.64231	14.262	14.8531	9.73725	14.4144	13.5765	10.7311	15.2176	12.4898	12.3882	14.059	14.7605	7.76924	12.2342	13.6073	14.8179	13.3704	15.0251	10.1014	6.4699	14.9157	13.5788	14.2799	14.5859	9.99872	13.3333	13.4437	13.446	10.6445	14.7399	13.0288	14.6128	14.7279	10.8831	14.1175	14.6908	15.2543	12.878
testTCGA-53-7624-01A	14.4302	13.4708	14.6143	14.0731	15.093	13.2585	14.1673	14.2227	15.3784	14.9187	14.2782	9.6351	13.9748	14.8565	10.3344	14.5656	13.7553	11.8804	15.2707	12.1615	12.1541	13.6627	15.2222	8.00084	12.2819	13.3177	14.4972	13.4969	14.9004	8.45385	7.88448	14.41	13.1659	14.3163	14.5026	10.5055	13.7957	12.5943	12.627	12.1018	14.5016	13.9156	13.8302	13.4695	11.6764	14.4524	14.6709	14.9357	13.0373
testTCGA-50-5936-01A	14.5284	13.2387	14.38	13.8504	15.0818	13.1782	13.5395	13.119	15.252	14.5068	14.07	6.67234	14.001	14.6844	10.4826	14.3053	13.6662	10.0892	15.2131	12.019	12.129	13.5573	15.1692	9.19992	12.1224	13.1686	14.3451	13.2772	14.9452	8.13471	5.67103	14.6418	13.0607	13.8283	14.6103	9.51734	13.0578	12.5891	12.8564	10.4866	14.7481	12.7952	13.8196	14.0038	11.1421	14.1169	14.5041	14.093	12.5654
testTCGA-05-4250-01A	14.3566	13.5775	14.5353	14.4804	15.0861	13.5207	13.6366	13.2686	15.4151	14.5684	14.1587	9.94713	14.2651	14.7908	10.3574	14.3958	12.9878	11.5748	15.1911	12.2057	12.483	13.3513	15.1733	8.75516	11.9621	13.6333	14.2575	13.4836	14.9938	9.6441	6.74816	14.7221	13.0728	14.005	14.6081	9.48034	13.5121	13.063	12.8237	11.3066	14.5218	13.0458	13.9738	14.0393	11.7752	14.3684	14.6067	14.8206	13.4805
testTCGA-97-8171-01A	14.3462	13.22	13.8497	15.0146	15.0241	12.1883	14.4201	12.926	14.5794	15.1018	14.4055	16.6883	14.1849	14.7397	11.695	14.7406	13.6099	16.2572	15.1627	12.9321	14.6568	14.1462	15.3309	16.419	12.6031	12.8452	13.9051	13.256	15.2035	9.55502	9.22718	14.1034	13.9633	14.2446	14.4969	11.8236	13.9502	14.7698	11.087	15.5063	14.4818	14.9485	13.9985	14.3721	12.4631	14.1174	14.9532	14.6602	14.6991
testTCGA-97-8547-01A	14.1713	13.068	14.3524	14.3217	15.0972	13.1396	13.5549	13.6061	15.3364	14.3585	14.1747	8.74874	13.9175	14.8035	10.3864	14.2228	12.7856	10.588	15.2434	11.8946	12.561	13.4625	15.3368	10.4002	12.1414	13.132	14.3195	13.3759	14.7344	8.16127	5.68918	14.4609	12.3978	13.8175	14.647	9.69423	13.3304	13.0713	12.1511	10.56	14.5726	12.8173	13.6628	13.4486	12.104	14.2846	14.6316	14.5273	13.1095
testTCGA-50-5072-01A	14.4518	13.2437	14.2676	14.0004	15.0455	12.901	13.7781	12.9815	15.1	14.7852	14.2832	7.03104	14.0119	14.8886	9.89649	14.4489	13.54	9.96906	15.1601	12.1462	12.3432	13.8972	15.0481	8.58461	12.1988	13.0724	14.2929	13.3951	14.9868	8.45339	5.70885	14.6362	13.2952	13.9476	14.5855	9.4959	13.391	12.7362	13.5189	10.7207	14.651	13.5384	14.3762	14.3148	11.1556	14.3225	14.6358	14.622	12.5059
testTCGA-56-7223-01A	14.1496	12.7544	14.4502	13.4391	15.0707	12.874	13.878	13.6314	15.3924	14.7535	14.0249	6.74077	14.1064	14.4751	8.8182	14.478	13.8742	9.13026	15.2114	12.0786	12.1639	13.7442	15.0082	8.03216	12.4293	13.4528	14.3994	12.9928	15.1665	8.82762	6.22828	14.7169	13.0052	14.4613	14.4538	9.51868	13.6114	12.7275	12.5731	11.0885	14.5491	12.7925	13.5782	13.5757	10.2961	13.9449	14.6142	14.936	11.9586
testTCGA-73-4675-01A	14.1383	13.3835	14.3599	14.024	15.0607	13.1855	14.5434	13.0865	15.2129	14.6534	14.2625	8.89714	14.126	14.7822	11.7404	14.4151	13.1025	10.9545	15.1842	12.6245	12.8311	13.7233	15.0515	9.24378	12.278	13.5239	14.3858	13.4618	14.463	8.5727	5.40772	14.6425	13.1653	14.0103	14.6203	9.99794	13.364	13.4671	13.1653	10.8761	14.5826	13.3686	14.1873	14.4085	11.4536	14.5422	14.7145	14.8072	13.3717
testTCGA-55-8615-01A	14.1639	13.063	14.4058	13.8639	15.0977	13.1116	13.676	13.2791	15.2578	14.374	14.1967	8.00322	14.1232	14.64	9.6094	14.3065	13.0816	9.7871	15.2571	12.0491	11.9041	13.6038	15.122	8.28187	12.2902	12.9745	14.4821	13.4885	14.8773	7.55327	4.75222	14.6645	12.702	13.7492	14.7163	9.03017	13.3141	12.6533	12.7739	10.3298	14.3173	12.9119	13.881	13.9115	11.0284	14.2885	14.767	14.4764	12.895
testTCGA-50-6594-01A	14.3255	13.519	14.393	14.2589	15.0551	13.4274	13.959	14.2114	15.465	14.6342	14.3166	10.6147	14.1203	14.9121	10.5169	14.3712	13.3043	11.7586	15.1768	12.2948	13.1924	13.9205	15.2834	10.1032	12.1125	13.4894	14.5336	13.6133	14.7331	9.19519	7.69044	14.782	13.0964	14.0456	14.541	9.88802	13.6184	13.4364	12.8848	11.4999	14.6078	13.1215	14.4423	14.172	12.1773	14.3091	14.7425	14.8759	13.4676
testTCGA-66-2793-01A	14.0257	12.6049	14.3052	13.3467	15.1371	12.3866	13.278	13.6105	15.0875	14.5867	13.8636	5.18254	13.7965	14.5861	8.88504	14.4483	13.5268	8.0232	15.422	11.2832	10.9104	12.3522	14.7278	6.45018	12.424	12.6511	14.0412	12.8608	15.4404	7.14969	4.31491	14.0514	11.9017	14.1857	14.4159	6.28381	12.235	11.6079	12.7395	10.2808	14.4373	13.0426	12.8645	12.1619	10.3679	13.94	14.664	14.5749	11.7976
testTCGA-99-8033-01A	14.2695	13.3879	14.2941	14.0664	15.0693	13.1121	13.8941	13.2929	15.3473	14.3598	14.1303	7.5104	14.1347	14.8265	9.77447	14.4167	13.3992	10.0428	15.236	12.2208	12.2559	13.5111	15.1273	9.04784	12.2151	13.3897	14.0602	13.2508	14.9358	8.64576	6.29741	14.6804	13.0103	13.9194	14.5466	9.00991	13.5712	13.006	13.1273	10.8487	14.6758	13.5164	13.9633	13.9969	10.9965	14.3262	14.6729	15.6028	12.6708
testTCGA-66-2756-01A	14.5383	13.1533	14.2246	13.7416	15.1506	13.1015	13.9292	13.7175	15.0788	14.7345	13.8479	5.85405	14.1615	14.8161	8.35476	14.3813	13.7135	8.70046	15.3337	11.7035	11.7926	13.1918	15.1738	7.91566	12.322	12.745	14.4428	13.0511	15.4589	7.67027	4.86367	14.6021	12.5647	14.1208	14.5408	8.27913	13.3961	12.6849	12.6076	10.6479	14.2078	13.0567	13.4342	13.341	10.3754	14.0627	14.6066	16.7259	12.0701
testTCGA-78-7536-01A	14.3469	12.9539	14.5242	13.2833	15.1828	12.7889	13.7737	13.5398	14.7739	14.5288	14.1182	5.71393	14.1544	14.7146	9.05687	14.4473	13.6811	9.50795	15.4598	12.2623	11.1655	13.5071	15.0895	8.4689	12.3795	12.7649	13.9297	13.4427	15.1168	7.8337	5.77824	14.7019	12.5032	14.2231	14.5409	7.4151	12.4235	12.1329	12.2424	10.5453	13.75	13.2413	13.2308	13.027	10.2598	14.254	14.4565	14.078	12.4799
testTCGA-55-8505-01A	14.279	13.2356	14.4672	14.066	15.0643	13.086	14.0297	13.3144	15.0438	14.6709	14.0587	7.62043	14.0522	14.8262	10.9336	14.3384	13.4034	10.3216	15.1657	12.1791	12.2917	14.172	15.0882	9.54926	12.2173	13.2141	14.5668	13.3726	14.9463	8.79615	5.50635	14.6758	13.1626	13.9806	14.6226	9.8385	13.4911	13.1421	13.6217	10.2045	14.8043	13.418	14.221	14.5594	11.7486	14.439	14.5968	14.2963	13.1499
testTCGA-NK-A7XE-01A	14.6012	12.7614	14.7248	14.0214	15.0263	13.2998	13.741	13.6546	15.1454	13.6972	14.3733	9.3792	13.9385	14.7911	12.1002	14.2903	13.4024	11.5174	15.1835	11.9992	13.1372	14.4813	15.0636	8.40577	12.2157	12.8421	14.9238	13.935	14.9381	9.23266	8.12051	14.86	13.1375	13.6153	14.8854	11.172	13.3722	13.7446	13.6672	12.0701	14.7372	13.9643	14.3086	13.8019	11.5688	13.9426	14.6674	14.8397	14.9998
testTCGA-05-5429-01A	14.2351	13.6663	14.5523	14.3994	15.109	13.7071	14.6431	13.0486	14.7364	14.4399	13.9581	9.651	14.4902	14.9537	11.5536	14.5202	13.8174	11.6385	15.1083	12.6238	12.3347	13.5821	14.8945	8.72412	12.2885	13.6934	14.2882	13.4549	15.0483	9.46302	6.37649	14.8893	13.4928	14.1866	14.6567	10.0551	13.4163	13.8411	14.318	9.13618	14.9766	13.9668	14.6729	14.9418	11.9631	14.5309	14.6366	14.8444	14.6256
testTCGA-O2-A52Q-01A	14.3697	13.4261	14.4197	14.2437	15.0632	13.1303	13.0765	12.9776	15.4033	14.4337	14.4399	6.95956	14.2238	14.9058	9.35974	14.4307	12.8743	9.85355	15.2402	12.064	12.3066	13.4508	15.4293	8.47237	11.9054	13.536	13.9471	13.4643	14.7627	8.36499	6.17248	14.452	12.8429	13.7922	14.6438	8.16154	13.3553	12.6227	13.1409	10.1112	14.6605	13.5817	13.8223	13.0064	11.3346	14.4181	14.7304	14.7743	12.6444
testTCGA-78-7146-01A	14.1368	13.7237	14.4331	14.3087	15.0639	13.4156	13.9076	14.0521	15.565	14.5588	14.3321	8.11415	14.4648	14.74	8.91693	14.4564	13.0456	11.0484	15.2654	12.0781	12.9468	13.6831	15.2116	9.4856	12.0571	13.6844	14.403	13.6349	14.6483	9.61372	8.41981	14.6905	12.971	13.9476	14.4634	9.13401	13.4838	13.0567	12.5826	11.5186	14.6204	12.6936	14.0363	13.928	11.6437	14.3266	14.5315	14.8065	12.5483
testTCGA-NJ-A4YI-01A	14.1169	13.33	14.1531	14.1513	15.0631	13.0721	13.0095	12.937	15.3033	14.4079	14.0087	8.60596	14.0108	14.5157	9.60772	14.1874	12.5968	10.3286	15.3178	11.9523	12.7004	12.8	15.6304	10.1912	12.2827	12.9947	13.6397	13.2747	14.8578	7.43226	6.84874	14.3698	12.0842	13.6953	14.5347	8.81714	13.0872	12.4154	11.9648	10.2144	14.4037	12.6583	13.3679	12.9161	10.797	14.2743	14.5962	14.51	12.9965
testTCGA-39-5040-01A	14.1741	13.5525	14.4883	14.506	15.1051	13.3697	14.5407	14.5822	15.2379	15.0267	14.2952	11.0249	13.9246	14.6933	11.8252	14.4949	13.9524	13.1974	15.3992	11.978	12.3505	13.1495	15.0514	8.47775	12.2991	13.0238	14.2109	13.1784	15.0063	8.53439	6.6568	14.0493	12.4089	14.3428	14.5956	12.2205	13.088	13.1624	11.1488	12.9295	14.7728	13.2677	13.517	12.9756	12.6511	14.4583	14.5785	14.6557	13.2671
testTCGA-55-6970-01A	14.7544	13.1106	14.3548	13.7452	15.0947	12.8608	13.6078	13.461	15.2017	14.549	14.0718	6.44744	14.0468	14.5872	9.26291	14.3246	13.9258	10.4056	15.3046	12.0661	11.8577	13.5434	15.1601	8.62072	12.1796	12.534	14.0222	13.4975	15.0671	7.63012	5.05732	14.5648	12.7923	13.885	14.6026	8.56842	12.5711	12.095	11.9573	10.7072	14.6516	13.1716	13.7196	13.8104	10.7515	14.3057	14.4587	13.5777	12.5953
testTCGA-62-8398-01A	14.2384	13.2519	14.4509	14.0046	15.0676	13.0378	13.8307	13.1535	15.3376	14.5067	14.1178	8.19792	14.1607	14.7015	10.3631	14.3319	13.3317	10.3878	15.1481	12.2201	11.8822	13.6833	15.1072	8.00312	12.2383	13.1732	14.2061	13.3508	14.8942	8.8688	5.9138	14.8053	13.1028	13.9363	14.6119	9.16386	13.4825	13.0384	13.2447	9.70111	14.5924	13.5594	14.2227	14.5312	11.1523	14.3546	14.638	14.8628	13.1403
testTCGA-75-6214-01A	14.2113	13.2807	14.5456	14.1393	15.0723	13.5412	14.1533	13.0048	15.5617	14.6031	14.2023	7.26172	14.2867	14.7606	10.8302	14.4998	13.017	10.4342	15.2057	11.9667	12.0859	13.9082	15.02	8.11637	12.1113	13.407	14.3809	13.661	15.0321	8.53658	6.13674	14.5802	13.1392	13.8764	14.6456	9.74964	13.3721	13.1679	13.5026	10.2539	14.5319	12.9088	14.2552	14.0122	12.1187	14.4845	14.5244	14.8026	13.0338
testTCGA-MP-A4T8-01A	14.3042	13.118	14.4214	13.8266	15.0798	12.8619	13.9753	13.3548	15.4142	14.4558	14.0358	7.29847	14.0363	14.8368	9.49318	14.2419	13.166	9.98225	15.2293	12.0238	12.0147	13.971	15.2038	8.81317	12.202	13.0597	14.3795	13.5023	14.8883	8.03368	5.11249	14.5117	12.607	13.7881	14.6334	9.64576	13.1386	12.8547	12.6921	10.1146	14.5676	12.8171	13.9578	13.8383	11.482	14.2572	14.6357	14.4826	12.5223
testTCGA-L9-A5IP-01A	14.2807	13.1567	14.5322	13.8506	15.0311	13.3418	14.0265	13.292	14.6641	14.5383	14.4918	7.15968	14.0201	14.8292	10.277	14.3679	13.3883	10.4985	15.1916	12.2556	12.4379	14.339	15.2286	8.7182	12.1818	13.2597	14.2624	13.5196	15.1231	8.33275	6.65888	14.5418	13.3616	13.8401	14.605	9.65986	13.3842	12.9605	13.6397	10.3232	14.1397	13.2845	14.2313	14.4494	11.6532	14.3436	14.7089	14.2598	12.7637
testTCGA-49-6761-01A	14.2401	13.3953	14.4077	14.0529	15.073	13.3854	13.2297	13.157	15.2861	14.2903	14.1062	7.04111	14.1609	14.6339	9.57865	14.3436	12.6822	9.53124	15.2599	11.7825	12.114	13.2508	15.3818	8.85488	12.0554	13.1909	14.0095	13.4133	15.0097	7.19782	5.9868	14.4929	12.4956	13.6359	14.6905	8.47071	12.9996	12.4892	12.3374	10.4651	14.5071	12.7092	13.7599	13.5296	11.0467	14.2477	14.4745	14.5551	12.5387
testTCGA-05-4244-01A	14.126	13.2698	14.288	14.6421	15.0713	13.238	13.6096	13.3535	15.434	14.3051	14.2073	10.2803	13.9898	14.7357	10.1052	14.2762	12.7294	12.0378	15.2804	12.3386	13.1072	13.2465	15.3703	9.97562	12.2192	13.1609	14.1293	13.393	14.676	8.45678	7.75856	14.4843	12.6422	13.9173	14.543	9.72232	13.2299	12.8779	12.3928	11.3786	14.484	13.1669	13.7784	13.3818	11.579	14.3904	14.4918	14.6522	13.7166
testTCGA-LA-A7SW-01A	14.3143	12.7439	14.426	14.2274	15.0381	13.0015	13.6075	13.7154	15.626	14.9285	14.4141	7.63057	14.331	14.9646	10.4552	14.4553	13.0582	9.79591	15.1764	11.4336	12.4111	13.2174	14.9424	6.81248	12.0131	13.0872	14.2761	13.4039	14.7212	7.50675	4.98605	14.1623	12.5322	13.9941	14.482	9.07445	13.4069	13.266	12.8745	9.44303	14.47	13.294	13.5942	12.734	11.83	14.1115	14.8819	14.8882	12.2578
testTCGA-O2-A5IB-01A	13.6525	12.9497	14.1333	13.5357	15.2268	12.2133	11.9316	13.8419	15.6478	14.7166	13.9661	3.40785	13.995	14.1867	4.76505	14.3429	13.1061	7.01093	15.5556	11.1931	11.1689	11.3835	14.7884	7.74499	12.4586	12.8288	13.6092	12.9601	15.4415	4.6788	3.99417	13.9086	10.8685	14.3343	14.3944	6.14802	12.7751	9.91496	8.66703	10.8682	14.73	11.6623	11.9846	11.7939	7.6671	13.608	14.0848	13.8956	10.6485
testTCGA-97-8176-01A	14.293	13.0678	14.3909	13.997	15.0533	12.9969	13.9079	12.9664	15.2754	14.416	14.1222	7.52929	14.1916	14.8307	10.0664	14.3357	13.1601	10.1273	15.2252	12.2198	12.1313	13.7662	15.1513	8.15489	12.2042	13.1405	14.1909	13.4079	14.8887	8.4301	5.87444	14.5051	13.0203	13.8937	14.6194	9.4387	13.5799	12.9823	13.3636	10.2394	14.6965	13.1302	14.0412	14.1246	11.4051	14.2708	14.6699	14.7874	12.7286
testTCGA-55-8094-01A	14.3524	13.0943	14.4923	13.938	15.0959	13.2609	14.3103	14.102	15.4609	14.4043	14.2466	8.9941	14.2006	14.8042	10.9203	14.353	13.3912	11.2866	15.2181	12.3015	12.1498	14.0634	15.1709	8.53623	12.3269	13.1711	14.8267	13.6178	14.924	8.98012	5.30431	14.7892	13.2817	14.1349	14.7132	10.3827	13.8367	13.5057	13.628	10.9943	14.8302	13.688	14.434	14.5747	11.8413	14.4295	14.6753	15.2178	13.1121
testTCGA-73-4670-01A	14.6558	13.435	14.515	13.9481	15.0878	13.254	14.0736	13.3621	15.1806	14.5145	14.2815	7.03856	14.2307	14.9382	9.69693	14.4358	13.5995	10.2647	15.1882	12.1659	11.8441	13.8573	15.0293	7.9174	12.136	13.0957	14.4882	13.5193	15.0528	8.51242	5.79143	14.8432	13.3602	13.9409	14.6736	8.99954	13.1952	12.8781	13.5793	10.6141	14.7487	13.4801	14.2553	14.2474	11.6921	14.4412	14.7233	14.5015	12.699
testTCGA-33-6737-01A	14.4871	13.0638	14.4737	13.941	15.055	13.2347	13.6912	13.2347	15.3788	14.5407	14.2374	7.35311	14.2522	14.8164	10.2597	14.4794	13.2702	10.6712	15.1895	12.2935	12.0192	14.106	15.0568	8.43883	12.0752	13.1944	14.4242	13.659	14.9344	8.54511	5.79637	14.6878	13.4579	13.9451	14.7558	9.39256	13.7561	13.1279	13.7787	10.7794	14.69	13.3573	14.2704	14.2052	11.6362	14.4008	14.6319	14.836	13.0878
testTCGA-50-6591-01A	14.0107	13.2187	14.4922	13.9219	15.1487	12.3986	12.3748	14.2636	15.5256	14.682	14.0953	6.46009	14.1874	14.2985	8.87389	14.502	13.0351	8.8457	15.4074	11.4326	11.0125	12.5768	14.3047	7.68569	12.0112	13.571	14.1501	13.2536	15.3619	5.82333	4.30935	14.6362	11.81	13.9378	14.5708	6.74569	12.8023	10.9929	11.5574	10.2978	14.5459	11.916	12.6456	12.768	9.30076	13.9121	14.8655	14.8118	11.6143
[truncated: 496 more columns]
