# Supplementary material for: Revealing prognostic insights of programmed cell death (PCD)-associated genes in advanced non-small cell lung cancer
Source: Aging (Albany NY). 2024 May 8;16(9):8110–41. doi: 10.18632/aging.205807 (PMC11131998; doi:10.18632/aging.205807)
Supplement: Supplementary Table 7 [file aging-16-205807-s008.xlsx]

## Sheet: Sheet1
Supplementary Table 7. Immunohistochemical information related to model genes
	Normal		Tumor
	URL	Patient information	URL	Patient information
CCL4(CAB004423)	https://www.proteinatlas.org/ENSG00000276409-CCL14/tissue/lung#img	Patient id: 2101 Male, age 21,Lung (T-28000),Normal tissue, NOS (M-00100)	https://www.proteinatlas.org/ENSG00000276409-CCL14/pathology/lung+cancer#img	Patient id: 1394 Male, age 84，Lung (T-28000)，Adenocarcinoma, NOS (M-81403)
CPA3(HPA008689)	https://www.proteinatlas.org/ENSG00000163751-CPA3/tissue/lung#img	Patient id: 2101 Male, age 21,Lung (T-28000),Normal tissue, NOS (M-00100)	https://www.proteinatlas.org/ENSG00000163751-CPA3/pathology/lung+cancer#img	Patient id: 2100 Female, age 47,Lung (T-28000),Squamous cell carcinoma, NOS (M-80703)
CX3CR1(HPA046587)	https://www.proteinatlas.org/ENSG00000168329-CX3CR1/tissue/lung#img	Patient id: 2208 Female, age 67，Lung (T-28000)。Cartilage tissue (T-1X700)Adenocarcinoma, NOS (M-81403) Normal tissue, NOS (M-00100)	https://www.proteinatlas.org/ENSG00000168329-CX3CR1/pathology/lung+cancer#img	Patient id: 1303 Male, age 68，Lung (T-28000)，Adenocarcinoma, NOS (M-81403)
IKZF3(HPA024377)	https://www.proteinatlas.org/ENSG00000161405-IKZF3/tissue/lung#img	Patient id: 2101 Male, age 21，Lung (T-28000)，Normal tissue, NOS (M-00100)	https://www.proteinatlas.org/ENSG00000161405-IKZF3/pathology/lung+cancer#img	Patient id: 3185 Male, age 66，Lung (T-28000)，Squamous cell carcinoma, NOS (M-80703)
KIF21B(HPA027249)	https://www.proteinatlas.org/ENSG00000116852-KIF21B/tissue/lung#img	Patient id: 2268 Female, age 49，Lung (T-28000)Bronchus (T-26000)，Normal tissue, NOS (M-00100)	https://www.proteinatlas.org/ENSG00000116852-KIF21B/pathology/lung+cancer#img	Patient id: 3048 Female, age 67，Lung (T-28000)Adenocarcinoma, NOS (M-81403)
SLC16A4(HPA046986)	https://www.proteinatlas.org/ENSG00000168679-SLC16A4/tissue/lung#img	Patient id: 2208 Female, age 67，Lung (T-28000)，Normal tissue, NOS (M-00100)	https://www.proteinatlas.org/ENSG00000168679-SLC16A4/pathology/lung+cancer#img	Patient id: 2567 Male, age 65，Lung (T-28000)Squamous cell carcinoma, NOS (M-80703)
