# Supplementary material for: Revealing prognostic insights of programmed cell death (PCD)-associated genes in advanced non-small cell lung cancer
Source: Aging (Albany NY). 2024 May 8;16(9):8110–41. doi: 10.18632/aging.205807 (PMC11131998; doi:10.18632/aging.205807)
Supplement: Supplementary Table 8 [file aging-16-205807-s009.xlsx]

## Sheet: Sheet1
Supplementary Table 8. The sample information in GEO cohort ( GSE61676,GSE13213,GSE91061,GSE135222,GSE93157,GSE50081,and GSE74777).
	GSE61676			GSE13213			GSE91061			GSE135222			GSE93157			GSE50081			GSE74777
	High_risk (N=43)	Low_risk (N=43)	P-value	High_risk (N=58)	Low_risk (N=58)	P-value	High_risk (N=50)	Low_risk (N=51)	P-value	High_risk (N=13)	Low_risk (N=14)	P-value	High_risk (N=11)	Low_risk (N=11)	P-value	High_risk(N=89)	Low_risk(N=90)	P-value	High_risk(N=53)	Low_risk(N=54)	P-value
Age:			0.100			0.694						0.440			1.000			1.000			0.768
<=65	34 (79.1%)	26 (60.5%)		37 (63.8%)	40 (69.0%)					7 (53.8%)	10 (71.4%)		9 (81.8%)	8 (72.7%)		29(32.6%)	30(33.3%)		29(54.7%)	27(50.0%)
>65	9 (20.9%)	17 (39.5%)		21 (36.2%)	18 (31.0%)					6 (46.2%)	4 (28.6%)		2 (18.2%)	3 (27.3%)		60(67.4%)	60(66.7%)		24(45.3%)	27(50.0%)
Gender:			0.828			0.577						1.000			1.000			0.703			0.546
Female	23 (53.5%)	25 (58.1%)		26 (44.8%)	30 (51.7%)					2 (15.4%)	3 (21.4%)		4 (36.4%)	3 (27.3%)		39(43.8%)	43(47.8%)		4(7.55%)	7(13.0%)
Male	20 (46.5%)	18 (41.9%)		32 (55.2%)	28 (48.3%)					11 (84.6%)	11 (78.6%)		7 (63.6%)	8 (72.7%)		50(56.2%)	47(52.2%)		49(92.5%)	47(87.0%)
Smoking:															0.269			0.403			0.826
CS													5 (45.5%)	3 (27.3%)		31(34.8%)	26(28.9%)		28(52.8%)	26(48.1%)
FS													6 (54.5%)	5 (45.5%)		35(39.3%)	42(46.7%)		24(45.3%)	26(48.1%)
NS													0 (0.00%)	3 (27.3%)		10(11.2%)	14(15.6%)		1(1.89%)	2(3.70%)
Unable to determine																13(14.6%)	8(8.89%)
Stage:			0.265			0.025												0.707			0.209
I				33 (56.9%)	46 (79.3%)											61(68.5%)	65(72.2%)		23(43.4%)	31(57.4%)
II				10 (17.2%)	3 (5.17%)											28(31.5%)	25(27.8%)		30(56.6%)	23(42.6%)
III	6 (14.0%)	2 (4.65%)		15 (25.9%)	9 (15.5%)
IV	37 (86.0%)	41 (95.3%)
T_stage:						0.004												1.000			0.073
T1				21 (36.2%)	33 (56.9%)											28(31.5%)	28(31.1%)		8(15.1%)	18(33.3%)
T2				27 (46.6%)	22 (37.9%)											60(67.4%)	61(67.8%)		35(66.0%)	30(55.6%)
T3				8 (13.8%)	0 (0.00%)											1(1.12%)	1(1.11%)		10(18.9%)	6(11.1%)
T4				2 (3.45%)	3 (5.17%)
M_stage:						.			1.000									.			.
M0				58 (100%)	58 (100%)		1 (2.13%)	1 (2.13%)								89(100%)	90(100%)		52(100%)	54(100%)
M1							41 (87.2%)	41 (87.2%)
UNKNOWN							5 (10.6%)	5 (10.6%)
N_stage:						0.163												0.705			0.947
N0				39 (67.2%)	48 (82.8%)											62(69.7%)	66(73.3%)		35(67.3%)	37(69.8%)
N1				5 (8.62%)	3 (5.17%)											27(30.3%)	24(26.7%)		17(32.7%)	16(30.2%)
N2				14 (24.1%)	7 (12.1%)
OS.time	296 [147;449]	411 [273;561]	0.012	1868 [932;2520]	2102 [1731;2702]	0.091	450 [166;740]	827 [381;977]	0.001							4.73[1.80;5.75]	4.94[2.63;6.01]	0.481	2117(1263)	2522(1052)	0.075
OS_status:			0.791			0.038			.									0.029			0.008
Alive	8 (18.6%)	10 (23.3%)		28 (48.3%)	40 (69.0%)											44(49.4%)	60(66.7%)		25(47.2%)	40(74.1%)
Dead	35 (81.4%)	33 (76.7%)		30 (51.7%)	18 (31.0%)		50 (100%)	51 (100%)								45(50.6%)	30(33.3%)		28(52.8%)	14(25.9%)
PFS.time										43.0 [28.0;95.0]	69.0 [39.5;197]	0.234	84.0 [49.0;198]	104 [44.0;147]	0.974
PFS_status:												0.648			0.361
Alive										2 (15.4%)	4 (28.6%)		2 (18.2%)	5 (45.5%)
Dead										11 (84.6%)	10 (71.4%)		9 (81.8%)	6 (54.5%)
Response:									0.002						0.635
CR/PR							4 (8.00%)	16 (31.4%)					4 (36.4%)	2 (18.2%)
NE							3 (6.00%)	0 (0.00%)
SD/PD							43 (86.0%)	35 (68.6%)					7 (63.6%)	9 (81.8%)
Clinical.benefit:												0.678
DCB										3 (23.1%)	5 (35.7%)
NDB										10 (76.9%)	9 (64.3%)
