# Supplementary material for: Revealing prognostic insights of programmed cell death (PCD)-associated genes in advanced non-small cell lung cancer
Source: Aging (Albany NY). 2024 May 8;16(9):8110–41. doi: 10.18632/aging.205807 (PMC11131998; doi:10.18632/aging.205807)
Supplement: Supplementary Table 9 [file aging-16-205807-s010.xlsx]

## Sheet: Sheet1
Supplementary Table 9. The RNA expression data of seven PRAN model genes using RT-qPCR.
Cell	Gene	Ct	2 - △△ CT
Beas-2b	GAPDH	20.18
Beas-2b	GAPDH	20.32
Beas-2b	GAPDH	20.11
Beas-2b	IKZF3	35.15	1.00928
Beas-2b	IKZF3	35.05	1.08172
Beas-2b	IKZF3	35.29	0.915945
H1299	GAPDH	17.09
H1299	GAPDH	17.04
H1299	GAPDH	17.15
H1299	IKZF3	31.32	1.67404
H1299	IKZF3	31.18	1.84463
H1299	IKZF3	31.47	1.50873
A549	GAPDH	18.26
A549	GAPDH	18.48
A549	GAPDH	18.43
A549	IKZF3	35.48	0.228986
A549	IKZF3	35.19	0.279968
A549	IKZF3	35.06	0.306367
Beas-2b	GAPDH	20.18
Beas-2b	GAPDH	20.32
Beas-2b	GAPDH	20.11
Beas-2b	KIF21B	29.47	1.04247
Beas-2b	KIF21B	29.5	1.02101
Beas-2b	KIF21B	29.62	0.939523
H1299	GAPDH	17.09
H1299	GAPDH	17.04
H1299	GAPDH	17.15
H1299	KIF21B	28.85	0.186856
H1299	KIF21B	29.03	0.164938
H1299	KIF21B	28.99	0.169576
A549	GAPDH	18.26
A549	GAPDH	18.48
A549	GAPDH	18.43
A549	KIF21B	26.68	2.05623
A549	KIF21B	26.51	2.31338
A549	KIF21B	26.37	2.54912
Beas-2b	GAPDH	20.18
Beas-2b	GAPDH	20.32
Beas-2b	GAPDH	20.11
Beas-2b	SLC16A4	31.32	0.993092
Beas-2b	SLC16A4	31.16	1.10957
Beas-2b	SLC16A4	31.45	0.907519
H1299	GAPDH	17.09
H1299	GAPDH	17.04
H1299	GAPDH	17.15
H1299	SLC16A4	31.15	0.130308
H1299	SLC16A4	30.64	0.185565
H1299	SLC16A4	31.16	0.129408
A549	GAPDH	18.26
A549	GAPDH	18.48
A549	GAPDH	18.43
A549	SLC16A4	24.72	27.4741
A549	SLC16A4	24.6	29.8571
A549	SLC16A4	24.68	28.2465
Beas-2b	GAPDH	20.18
Beas-2b	GAPDH	20.32
Beas-2b	GAPDH	20.11
Beas-2b	CPA3	29.65	1.08925
Beas-2b	CPA3	29.65	1.08925
Beas-2b	CPA3	30.02	0.842842
H1299	GAPDH	17.09
H1299	GAPDH	17.04
H1299	GAPDH	17.15
H1299	CPA3	32.37	0.0192811
H1299	CPA3	32.32	0.0199611
H1299	CPA3	32.35	0.0195503
A549	GAPDH	18.26
A549	GAPDH	18.48
A549	GAPDH	18.43
A549	CPA3	31.82	0.0690284
A549	CPA3	30.7	0.150031
A549	CPA3	31.38	0.0936442
Beas-2b	GAPDH	20.18
Beas-2b	GAPDH	20.32
Beas-2b	GAPDH	20.11
Beas-2b	CX3CR1	33.09	0.6846
Beas-2b	CX3CR1	31.55	1.99078
Beas-2b	CX3CR1	32.99	0.733736
H1299	GAPDH	17.09
H1299	GAPDH	17.04
H1299	GAPDH	17.15
H1299	CX3CR1	32.06	0.163044
H1299	CX3CR1	32.03	0.16647
H1299	CX3CR1	32.25	0.142925
A549	GAPDH	18.26
A549	GAPDH	18.48
A549	GAPDH	18.43
A549	CX3CR1	28.63	4.29701
A549	CX3CR1	28.98	3.37137
A549	CX3CR1	29.08	3.1456
Beas-2b	GAPDH	20.18
Beas-2b	GAPDH	20.32
Beas-2b	GAPDH	20.11
Beas-2b	CCL14	31.25	1.82344
Beas-2b	CCL14	32.24	0.918064
Beas-2b	CCL14	32.86	0.597358
H1299	GAPDH	17.09
H1299	GAPDH	17.04
H1299	GAPDH	17.15
H1299	CCL14	32.28	0.104145
H1299	CCL14	32.21	0.109323
H1299	CCL14	31.44	0.186425
A549	GAPDH	18.26
A549	GAPDH	18.48
A549	GAPDH	18.43
A549	CCL14	29.62	1.60956
A549	CCL14	29.54	1.70133
A549	CCL14	29.38	1.90088
Beas-2b	GAPDH	20.18
Beas-2b	GAPDH	20.32
Beas-2b	GAPDH	20.11
Beas-2b	LINC00528	32.21	0.571701
Beas-2b	LINC00528	31.78	0.770215
Beas-2b	LINC00528	30.22	2.27101
H1299	GAPDH	17.09
H1299	GAPDH	17.04
H1299	GAPDH	17.15
H1299	LINC00528	28.27	1.02337
H1299	LINC00528	28.69	0.764895
H1299	LINC00528	29.07	0.587774
A549	GAPDH	18.26
A549	GAPDH	18.48
A549	GAPDH	18.43
A549	LINC00528	31.26	0.31498
A549	LINC00528	31.31	0.304251
A549	LINC00528	31.62	0.245421
